# Supplementary material for: Exploration of linear and third-order nonlinear optical properties for donor–π-linker–acceptor chromophores derived from ATT-2 based non-fullerene molecule
Source: Royal Society of Chemistry journal article supplement (doi:10.1039/d3ra04580c), 2023-01-01
Supplement: d3ra04580c1.pdf [file d3ra04580c1.pdf]

## Supplementary Information

### Exploration of Linear and Third-order Nonlinear Optical Properties for Donor- $\pi$ linker-Acceptor Chromophores Derived from ATT-2 Based Non-fullerene Molecule

Muhammad Sagir,<sup>1</sup> Kalsoom Mushtaq,<sup>2,3</sup> Muhammad Khalid,<sup>\*2,3</sup> Mashal Khan,<sup>2,3</sup> Muhammad Bilal Tahir,<sup>4</sup> Ataulpa A. C. Braga,<sup>5</sup>

<sup>1</sup>Institute of Chemical and Environmental Engineering, Khwaja Fareed University of Engineering & Information Technology, Rahim Yar Khan, 64200, Pakistan

<sup>2</sup>Institute of Chemistry, Khwaja Fareed University of Engineering & Information Technology, Rahim Yar Khan, 64200, Pakistan

<sup>3</sup>Centre for Theoretical and Computational Research, Khwaja Fareed University of Engineering & Information Technology, Rahim Yar Khan, 64200, Pakistan

<sup>4</sup>Institute of Physics, Khwaja Fareed University of Engineering & Information Technology, Rahim Yar Khan, 64200, Pakistan

<sup>5</sup>Departamento de Química Fundamental, Instituto de Química, Universidade de São Paulo, Av. Prof. Lineu Prestes, 748, São Paulo, 05508-000, Brazil

\*Corresponding author's E-mail address:

Dr. Muhammad Khalid (khalid@iq.usp.br)

**Table S1:** Cartesian coordinates of **ATTR1**.

| Atom | X-axis   | Y-axis   | Z-axis   |
|------|----------|----------|----------|
| C    | -0.32841 | -1.38659 | 0.071583 |
| C    | 0.987857 | -0.97567 | 0.071205 |
| C    | 1.314433 | 0.399344 | 0.072734 |
| C    | 0.328379 | 1.386507 | 0.071646 |
| C    | -0.98788 | 0.975588 | 0.07121  |
| C    | -1.31446 | -0.39943 | 0.072669 |
| H    | -0.59179 | -2.44215 | 0.071861 |
| H    | 0.591763 | 2.442065 | 0.071957 |
| C    | -2.75294 | -0.47503 | 0.076341 |
| C    | -3.3118  | 0.784515 | 0.073734 |
| C    | -4.70572 | 0.771678 | 0.083639 |
| H    | -5.33353 | 1.657391 | 0.093914 |
| C    | 3.311776 | -0.7846  | 0.073786 |
| C    | 4.705695 | -0.77175 | 0.083693 |
| C    | 5.222884 | 0.513981 | 0.09422  |
| H    | 5.333518 | -1.65745 | 0.093934 |
| S    | -3.9363  | -1.71879 | 0.088532 |
| S    | 3.936247 | 1.718716 | 0.088625 |
| C    | 2.752906 | 0.474947 | 0.076424 |

|   |          |          |          |
|---|----------|----------|----------|
| C | -5.22292 | -0.51404 | 0.09416  |
| C | -2.23735 | 1.841134 | 0.071518 |
| C | 2.23732  | -1.84122 | 0.071514 |
| C | -8.5806  | -2.13978 | 0.228462 |
| C | -7.17471 | -2.14801 | 0.256742 |
| C | -6.59723 | -0.89675 | 0.103412 |
| S | -7.82843 | 0.323573 | -0.09209 |
| C | 9.132428 | 0.853809 | 0.048027 |
| C | 8.580556 | 2.139758 | 0.228311 |
| C | 7.174667 | 2.147965 | 0.256769 |
| S | 7.828384 | -0.3236  | -0.09223 |
| C | -9.13248 | -0.85381 | 0.048323 |
| C | 6.597179 | 0.896704 | 0.103452 |
| C | -10.5141 | -0.66275 | -0.00671 |
| C | 10.51402 | 0.662733 | -0.00696 |
| C | 11.33509 | -0.43662 | -0.16559 |
| H | 11.02439 | 1.614006 | 0.105084 |
| C | 12.78172 | -0.43934 | -0.20011 |
| C | 13.64621 | 0.631379 | -0.0948  |
| C | 13.40661 | -4.60411 | -0.7195  |
| C | 14.5477  | -3.81216 | -0.64905 |
| C | 14.47201 | -2.43232 | -0.47902 |
| C | 13.21618 | -1.84364 | -0.37936 |
| C | 12.0805  | -2.6555  | -0.45255 |
| C | 12.1485  | -4.02234 | -0.62011 |
| H | 15.38704 | -1.85801 | -0.42875 |
| H | 11.23745 | -4.61052 | -0.67091 |
| C | 10.87417 | -1.81918 | -0.32631 |
| C | 15.05957 | 0.504365 | -0.14774 |
| N | 16.21402 | 0.453526 | -0.18501 |
| C | 13.22982 | 1.978088 | 0.077059 |
| N | 12.92553 | 3.085118 | 0.218368 |
| O | 9.725823 | -2.22136 | -0.35332 |
| H | -11.0245 | -1.61401 | 0.105355 |
| C | -11.3351 | 0.436628 | -0.16536 |
| C | -10.8741 | 1.81918  | -0.3259  |
| C | -12.7817 | 0.439425 | -0.20004 |
| C | -13.6463 | -0.63123 | -0.09487 |
| O | -9.72569 | 2.221298 | -0.35265 |
| C | -13.2161 | 1.843739 | -0.37942 |
| C | -12.0803 | 2.655549 | -0.45245 |
| C | -12.1483 | 4.022385 | -0.62002 |
| C | -13.4064 | 4.604189 | -0.71959 |
| C | -14.5475 | 3.812288 | -0.64928 |
| C | -14.4719 | 2.432447 | -0.47922 |
| H | -11.2372 | 4.610566 | -0.67069 |
| H | -15.3869 | 1.858128 | -0.42901 |
| C | -13.23   | -1.97794 | 0.077252 |

|   |          |          |          |
|---|----------|----------|----------|
| N | -12.9257 | -3.08495 | 0.218797 |
| C | -15.0596 | -0.50418 | -0.1483  |
| N | -16.214  | -0.4533  | -0.18598 |
| C | 2.311373 | -2.70961 | 1.327119 |
| H | 1.484149 | -3.42744 | 1.347644 |
| H | 3.250703 | -3.27365 | 1.345095 |
| H | 2.259441 | -2.09625 | 2.232511 |
| C | 2.313412 | -2.70842 | -1.18471 |
| H | 1.486173 | -3.42618 | -1.20733 |
| H | 2.263115 | -2.09424 | -2.08963 |
| H | 3.252873 | -3.2723  | -1.20144 |
| C | -2.31142 | 2.709448 | 1.327183 |
| H | -1.4842  | 3.427286 | 1.347766 |
| H | -3.25076 | 3.273482 | 1.34518  |
| H | -2.2595  | 2.09603  | 2.232534 |
| C | -2.31342 | 2.708412 | -1.18464 |
| H | -2.2631  | 2.094301 | -2.0896  |
| H | -3.25288 | 3.272282 | -1.20135 |
| H | -1.48619 | 3.426186 | -1.20721 |
| C | -9.14007 | -3.43563 | 0.401992 |
| H | -10.2019 | -3.66233 | 0.413542 |
| C | -8.19354 | -4.39659 | 0.558506 |
| C | 9.140036 | 3.435601 | 0.401816 |
| H | 10.20184 | 3.662307 | 0.413288 |
| C | 8.193516 | 4.396548 | 0.55848  |
| C | 8.396431 | 5.85167  | 0.763727 |
| H | 7.962151 | 6.18506  | 1.711959 |
| H | 9.464016 | 6.082102 | 0.774941 |
| H | 7.926538 | 6.436645 | -0.03361 |
| C | -8.39645 | -5.85172 | 0.763729 |
| H | -7.92648 | -6.43668 | -0.03357 |
| H | -7.96224 | -6.1851  | 1.711994 |
| H | -9.46403 | -6.08216 | 0.77486  |
| S | -6.55297 | -3.76241 | 0.502303 |
| S | 6.552938 | 3.762369 | 0.502405 |
| H | 15.52486 | -4.27749 | -0.7279  |
| H | 13.50365 | -5.67657 | -0.85172 |
| H | -15.5246 | 4.277651 | -0.72824 |
| H | -13.5033 | 5.676658 | -0.85184 |

**Table S2:** Cartesian coordinates of ATTD2.

| Atom | X-axis   | Y-axis   | Z-axis   |
|------|----------|----------|----------|
| C    | 1.552638 | 1.449256 | 0.125102 |
| C    | 2.866492 | 1.025011 | 0.111581 |
| C    | 3.180835 | -0.34947 | 0.041245 |
| C    | 2.182847 | -1.32536 | -0.01368 |
| C    | 0.872378 | -0.90209 | -0.0016  |
| C    | 0.555646 | 0.475533 | 0.065535 |

|   |          |          |          |
|---|----------|----------|----------|
| H | 1.300415 | 2.50642  | 0.176608 |
| H | 2.435653 | -2.38246 | -0.06769 |
| C | -0.88253 | 0.561947 | 0.052683 |
| C | -1.45114 | -0.68503 | -0.02196 |
| C | -2.8515  | -0.66347 | -0.06818 |
| H | -3.48434 | -1.54225 | -0.14699 |
| C | 5.190608 | 0.814685 | 0.100357 |
| C | 6.582752 | 0.787248 | 0.080825 |
| C | 7.088443 | -0.50197 | -0.00383 |
| H | 7.220462 | 1.66555  | 0.112809 |
| S | -2.06846 | 1.814818 | 0.082159 |
| S | 5.786094 | -1.69141 | -0.05438 |
| C | 4.617218 | -0.43829 | 0.033108 |
| C | -3.35909 | 0.620157 | -0.0243  |
| C | -0.38716 | -1.75161 | -0.05885 |
| C | 4.124111 | 1.878555 | 0.157507 |
| C | -6.73468 | 2.270868 | -0.23752 |
| C | -5.30874 | 2.264617 | -0.2291  |
| C | -4.73273 | 1.02902  | -0.04929 |
| S | -6.00397 | -0.15756 | 0.150069 |
| C | 10.99425 | -0.89593 | -0.04179 |
| C | 10.417   | -2.16408 | -0.27458 |
| C | 9.012586 | -2.15028 | -0.27454 |
| S | 9.709472 | 0.292155 | 0.187023 |
| C | -7.27702 | 1.014355 | -0.05399 |
| C | 8.454695 | -0.89862 | -0.05124 |
| C | 12.37649 | -0.72531 | -0.0303  |
| C | 13.22207 | 0.353345 | 0.159019 |
| H | 12.86967 | -1.67452 | -0.21567 |
| C | 14.66544 | 0.334395 | 0.111932 |
| C | 15.50487 | -0.73142 | -0.14872 |
| C | 15.39837 | 4.423071 | 0.973867 |
| C | 16.51845 | 3.624158 | 0.771348 |
| C | 16.40561 | 2.267081 | 0.480629 |
| C | 15.13471 | 1.710705 | 0.393958 |
| C | 14.01951 | 2.528672 | 0.599434 |
| C | 14.12472 | 3.872834 | 0.887035 |
| H | 17.30476 | 1.684323 | 0.330982 |
| H | 13.23058 | 4.469402 | 1.039214 |
| C | 12.79294 | 1.722053 | 0.457321 |
| C | 16.92033 | -0.62606 | -0.17391 |
| N | 18.0758  | -0.59337 | -0.20648 |
| C | 15.05728 | -2.0503  | -0.4238  |
| N | 14.72858 | -3.13598 | -0.65119 |
| O | 11.65357 | 2.134828 | 0.573483 |
| C | 4.207425 | 2.810281 | -1.05122 |
| H | 3.38692  | 3.535997 | -1.0351  |
| H | 5.152133 | 3.365684 | -1.04016 |

|   |          |          |          |
|---|----------|----------|----------|
| H | 4.150105 | 2.245056 | -1.98717 |
| C | 4.205322 | 2.679305 | 1.456667 |
| H | 3.382801 | 3.400475 | 1.515948 |
| H | 4.149517 | 2.019342 | 2.328481 |
| H | 5.148757 | 3.235037 | 1.503628 |
| C | -0.45519 | -2.55825 | -1.35505 |
| H | 0.362651 | -3.28589 | -1.4009  |
| H | -1.40189 | -3.10757 | -1.41267 |
| H | -0.38372 | -1.90244 | -2.22892 |
| C | -0.48809 | -2.67814 | 1.152485 |
| H | -0.43809 | -2.10902 | 2.08655  |
| H | -1.43645 | -3.22729 | 1.133528 |
| H | 0.328273 | -3.40892 | 1.148727 |
| C | -7.26395 | 3.578456 | -0.50728 |
| H | -8.32029 | 3.810087 | -0.58732 |
| C | -6.30993 | 4.517204 | -0.67562 |
| C | 10.95307 | -3.45641 | -0.52752 |
| H | 12.01083 | -3.69732 | -0.57293 |
| C | 9.988775 | -4.39427 | -0.71507 |
| C | 10.16771 | -5.83972 | -0.99759 |
| H | 9.712899 | -6.11931 | -1.9535  |
| H | 11.2318  | -6.08248 | -1.03984 |
| H | 9.704067 | -6.45865 | -0.2225  |
| C | -6.47932 | 5.963309 | -0.9639  |
| H | -6.03538 | 6.584622 | -0.17847 |
| H | -6.00216 | 6.24447  | -1.90892 |
| H | -7.54226 | 6.208137 | -1.03184 |
| S | -4.6657  | 3.867456 | -0.52335 |
| S | 8.360935 | -3.74036 | -0.59348 |
| H | 17.50736 | 4.065453 | 0.841342 |
| H | 15.52311 | 5.477131 | 1.199073 |
| C | -8.66943 | 0.601024 | -0.01114 |
| C | -9.07606 | -0.65835 | -0.469   |
| C | -9.66179 | 1.452098 | 0.491666 |
| C | -10.4008 | -1.04462 | -0.44523 |
| H | -8.33998 | -1.33872 | -0.88949 |
| C | -10.989  | 1.072936 | 0.521083 |
| H | -9.38186 | 2.414837 | 0.909115 |
| C | -11.3896 | -0.18189 | 0.044401 |
| H | -10.6828 | -2.01982 | -0.82944 |
| H | -11.7311 | 1.748596 | 0.93464  |
| N | -12.7346 | -0.56051 | 0.059004 |
| C | -13.1039 | -1.92681 | 0.169976 |
| C | -14.0071 | -2.4877  | -0.73508 |
| C | -12.5879 | -2.72562 | 1.182358 |
| C | -14.3783 | -3.81171 | -0.62581 |
| H | -14.4188 | -1.86896 | -1.52761 |
| C | -12.9397 | -4.06541 | 1.287824 |

|   |          |          |          |
|---|----------|----------|----------|
| H | -11.8917 | -2.29576 | 1.897226 |
| C | -13.843  | -4.61572 | 0.38255  |
| H | -15.0794 | -4.25862 | -1.32355 |
| H | -12.5144 | -4.66253 | 2.086282 |
| C | -13.7637 | 0.409532 | -0.0577  |
| C | -14.8477 | 0.396244 | 0.810293 |
| C | -13.7207 | 1.378365 | -1.06384 |
| C | -15.8738 | 1.326026 | 0.691774 |
| H | -14.8931 | -0.35803 | 1.59094  |
| C | -14.7241 | 2.317425 | -1.17614 |
| H | -12.8852 | 1.390341 | -1.75793 |
| C | -15.8117 | 2.300135 | -0.30035 |
| H | -16.7074 | 1.286986 | 1.383842 |
| H | -14.6989 | 3.075921 | -1.95215 |
| O | -16.7453 | 3.259498 | -0.49803 |
| O | -14.2599 | -5.90276 | 0.397939 |
| C | -17.8578 | 3.28498  | 0.367934 |
| H | -17.5532 | 3.444296 | 1.40988  |
| H | -18.4805 | 4.119672 | 0.04734  |
| H | -18.4404 | 2.35746  | 0.303008 |
| C | -13.7429 | -6.7523  | 1.397871 |
| H | -14.1936 | -7.73093 | 1.235734 |
| H | -12.6519 | -6.84272 | 1.324175 |
| H | -14.0059 | -6.39841 | 2.402507 |

**Table S3:** Cartesian coordinates of ATTD3.

| <b>Atom</b> | <b>X-axis</b> | <b>Y-axis</b> | <b>Z-axis</b> |
|-------------|---------------|---------------|---------------|
| C           | 0.456422      | -0.98066      | -0.40025      |
| C           | -0.83451      | -0.49166      | -0.39732      |
| C           | -1.08171      | 0.896051      | -0.47598      |
| C           | -0.03741      | 1.82085       | -0.55636      |
| C           | 1.250637      | 1.333283      | -0.55579      |
| C           | 1.49885       | -0.05775      | -0.47947      |
| H           | 0.6568        | -2.04835      | -0.34031      |
| H           | -0.23796      | 2.888845      | -0.61426      |
| C           | 2.929901      | -0.21655      | -0.49363      |
| C           | 3.562057      | 0.998874      | -0.57322      |
| C           | 4.961027      | 0.902787      | -0.60101      |
| H           | 5.64195       | 1.745019      | -0.67942      |
| C           | -3.14441      | -0.16576      | -0.34602      |
| C           | -4.53298      | -0.06697      | -0.30753      |
| C           | -4.97493      | 1.246603      | -0.37837      |
| H           | -5.21195      | -0.91205      | -0.24392      |
| S           | 4.046099      | -1.52954      | -0.43686      |
| S           | -3.61708      | 2.367209      | -0.49381      |
| C           | -2.51156      | 1.056318      | -0.44529      |
| C           | 5.398549      | -0.40552      | -0.53697      |
| C           | 2.552423      | 2.117118      | -0.62526      |

|   |          |          |          |
|---|----------|----------|----------|
| C | -2.13142 | -1.28117 | -0.3127  |
| C | 8.673282 | -2.25656 | -0.64042 |
| C | 7.253882 | -2.1548  | -0.72218 |
| C | 6.746868 | -0.89319 | -0.517   |
| S | 8.074541 | 0.195722 | -0.1798  |
| C | -8.84684 | 1.861525 | -0.15819 |
| C | -8.22138 | 3.080615 | -0.50445 |
| C | -6.8239  | 2.984924 | -0.60477 |
| S | -7.61238 | 0.617047 | 0.051792 |
| C | 9.280993 | -1.04889 | -0.35761 |
| C | -6.31821 | 1.71614  | -0.35316 |
| C | -10.2305 | 1.769864 | -0.03652 |
| C | -11.1131 | 0.752756 | 0.279955 |
| H | -10.6908 | 2.726124 | -0.26557 |
| C | -12.5582 | 0.857602 | 0.368462 |
| C | -13.3175 | 2.008494 | 0.368046 |
| C | -14.0498 | -2.60943 | 0.948043 |
| C | -14.3052 | -1.25542 | 0.608498 |
| C | -13.0773 | -0.5096  | 0.595521 |
| C | -12.0054 | -1.32519 | 0.827879 |
| C | -10.7301 | -0.61402 | 0.629118 |
| C | -14.695  | 2.052852 | 0.702302 |
| N | -15.8082 | 2.160656 | 0.995434 |
| C | -12.7886 | 3.309299 | 0.145577 |
| N | -12.4059 | 4.384492 | -0.03973 |
| O | -9.62013 | -1.09529 | 0.732485 |
| C | -2.29271 | -2.2138  | -1.51289 |
| H | -1.50695 | -2.97697 | -1.51399 |
| H | -3.26199 | -2.72355 | -1.47232 |
| H | -2.23425 | -1.65714 | -2.45389 |
| C | -2.21714 | -2.07066 | 0.993253 |
| H | -1.43251 | -2.83398 | 1.034087 |
| H | -2.1016  | -1.41055 | 1.859026 |
| H | -3.18662 | -2.57586 | 1.070734 |
| C | 2.659454 | 2.899187 | -1.93422 |
| H | 1.879133 | 3.666217 | -1.99108 |
| H | 3.632704 | 3.398839 | -2.00123 |
| H | 2.553551 | 2.234015 | -2.79745 |
| C | 2.70027  | 3.056386 | 0.57111  |
| H | 2.623831 | 2.505638 | 1.514373 |
| H | 3.674166 | 3.558297 | 0.54272  |
| H | 1.920562 | 3.825874 | 0.556089 |
| C | 9.133809 | -3.58473 | -0.9368  |
| H | 10.17545 | -3.88454 | -0.96319 |
| C | 8.134303 | -4.44894 | -1.20765 |
| C | -8.70345 | 4.388145 | -0.78442 |
| H | -9.74558 | 4.690578 | -0.75742 |
| C | -7.70609 | 5.257667 | -1.09084 |

|   |          |          |          |
|---|----------|----------|----------|
| C | -7.82697 | 6.696379 | -1.43239 |
| H | -7.43419 | 6.903647 | -2.43313 |
| H | -8.87602 | 6.999151 | -1.40595 |
| H | -7.26996 | 7.322306 | -0.72772 |
| C | 8.228797 | -5.88958 | -1.55274 |
| H | 7.692155 | -6.51245 | -0.82888 |
| H | 7.800077 | -6.09637 | -2.53926 |
| H | 9.275573 | -6.20339 | -1.56271 |
| S | 6.52981  | -3.69792 | -1.12889 |
| S | -6.11263 | 4.516972 | -1.05453 |
| C | 10.68955 | -0.74357 | -0.17393 |
| C | 11.22567 | 0.508864 | -0.50006 |
| C | 11.56641 | -1.7003  | 0.352995 |
| C | 12.56502 | 0.789359 | -0.32209 |
| H | 10.58348 | 1.270108 | -0.93568 |
| C | 12.90741 | -1.42827 | 0.533497 |
| H | 11.17794 | -2.66382 | 0.669512 |
| C | 13.43753 | -0.17668 | 0.194874 |
| H | 12.95343 | 1.763642 | -0.60197 |
| H | 13.55637 | -2.18517 | 0.96255  |
| N | 14.79591 | 0.101642 | 0.368847 |
| C | 15.23495 | 1.417488 | 0.670522 |
| C | 16.28208 | 1.992484 | -0.05242 |
| C | 14.65426 | 2.146667 | 1.700691 |
| C | 16.73336 | 3.25941  | 0.254098 |
| H | 16.74436 | 1.429632 | -0.85844 |
| C | 15.0875  | 3.431736 | 2.002279 |
| H | 13.84522 | 1.705662 | 2.276194 |
| C | 16.13733 | 3.993969 | 1.281321 |
| H | 17.54818 | 3.715245 | -0.29953 |
| H | 14.60811 | 3.973133 | 2.809213 |
| C | 15.76491 | -0.93185 | 0.292275 |
| C | 16.73425 | -1.06604 | 1.277463 |
| C | 15.78093 | -1.81565 | -0.79037 |
| C | 17.70829 | -2.05411 | 1.196566 |
| H | 16.73231 | -0.38159 | 2.121149 |
| C | 16.72934 | -2.81374 | -0.86681 |
| H | 15.03589 | -1.71321 | -1.57437 |
| C | 17.70488 | -2.94124 | 0.124314 |
| H | 18.45474 | -2.12833 | 1.979326 |
| H | 16.74925 | -3.50622 | -1.70243 |
| O | 18.5954  | -3.94557 | -0.04699 |
| O | 16.64678 | 5.228668 | 1.497894 |
| C | 19.59122 | -4.11607 | 0.936764 |
| H | 19.15278 | -4.32654 | 1.920267 |
| H | 20.19237 | -4.96937 | 0.624332 |
| H | 20.23617 | -3.23182 | 1.013912 |
| C | 16.08619 | 6.004239 | 2.533885 |



|   |          |          |          |
|---|----------|----------|----------|
| H | 16.63653 | 6.944486 | 2.548065 |
| H | 15.02452 | 6.212925 | 2.351634 |
| H | 16.19242 | 5.511308 | 3.508391 |
| C | -15.0581 | -3.56241 | 1.028036 |
| H | -14.8494 | -4.59783 | 1.271525 |
| C | -15.6267 | -0.90941 | 0.289963 |
| H | -15.9046 | 0.094024 | 0.001121 |
| C | -16.6173 | -1.85338 | 0.365843 |
| C | -16.3427 | -3.17668 | 0.737429 |
| S | -12.3537 | -2.96066 | 1.162442 |
| N | -17.9977 | -1.37259 | 0.172406 |
| O | -18.1856 | -0.58006 | -0.72181 |
| O | -18.8288 | -1.76979 | 0.956658 |
| N | -17.3603 | -4.23615 | 0.669294 |
| O | -18.1739 | -4.15911 | -0.22375 |
| O | -17.2807 | -5.13128 | 1.480468 |

**Table S4:** Cartesian coordinates of ATTD4.

| Atom | X-axis   | Y-axis   | Z-axis   |
|------|----------|----------|----------|
| C    | 0.116887 | -1.02876 | 0.153791 |
| C    | -1.17577 | -0.54446 | 0.133566 |
| C    | -1.42754 | 0.839265 | 0.012643 |
| C    | -0.38601 | 1.764495 | -0.08919 |
| C    | 0.903994 | 1.281166 | -0.07073 |
| C    | 1.156841 | -0.10548 | 0.049615 |
| H    | 0.32002  | -2.09382 | 0.244795 |
| H    | -0.58962 | 2.829453 | -0.18239 |
| C    | 2.588837 | -0.26012 | 0.032192 |
| C    | 3.216376 | 0.953405 | -0.09585 |
| C    | 4.614758 | 0.859893 | -0.14517 |
| H    | 5.290491 | 1.701808 | -0.26231 |
| C    | -3.48787 | -0.22748 | 0.137852 |
| C    | -4.87865 | -0.13594 | 0.138381 |
| C    | -5.32567 | 1.171095 | 0.017603 |
| H    | -5.55402 | -0.98283 | 0.214651 |
| S    | 3.709939 | -1.56758 | 0.111504 |
| S    | -3.97121 | 2.295771 | -0.0956  |
| C    | -2.85914 | 0.993537 | 0.01782  |
| C    | 5.058295 | -0.44457 | -0.04898 |
| C    | 2.202719 | 2.066688 | -0.17179 |
| C    | -2.4708  | -1.33647 | 0.224537 |
| C    | 8.334814 | -2.2921  | -0.18511 |
| C    | 6.911865 | -2.20153 | -0.18304 |
| C    | 6.408225 | -0.92805 | -0.05774 |
| S    | 7.746694 | 0.189702 | 0.096107 |
| C    | -9.21007 | 1.753175 | 0.035527 |
| C    | -8.57865 | 2.989763 | -0.20807 |
| C    | -7.17498 | 2.907703 | -0.2341  |

|   |          |          |          |
|---|----------|----------|----------|
| S | -7.98131 | 0.506181 | 0.245534 |
| C | 8.949457 | -1.06274 | -0.05125 |
| C | -6.67347 | 1.632938 | -0.01629 |
| C | -10.6025 | 1.645484 | 0.072482 |
| C | -11.4891 | 0.608541 | 0.267414 |
| H | -11.0578 | 2.611352 | -0.12443 |
| C | -12.9408 | 0.695178 | 0.270902 |
| C | -13.7103 | 1.837431 | 0.341467 |
| C | -14.4376 | -2.80921 | 0.371091 |
| C | -14.6755 | -1.42847 | 0.158502 |
| C | -13.4541 | -0.68664 | 0.323638 |
| C | -12.3938 | -1.51688 | 0.561572 |
| C | -11.1192 | -0.78663 | 0.526584 |
| C | -15.1022 | 1.842492 | 0.616385 |
| N | -16.2267 | 1.918475 | 0.874209 |
| C | -13.1786 | 3.154557 | 0.277579 |
| N | -12.7904 | 4.242131 | 0.218176 |
| O | -10.0107 | -1.26192 | 0.669007 |
| C | -2.60968 | -2.31034 | -0.94492 |
| H | -1.82213 | -3.07083 | -0.90709 |
| H | -3.57816 | -2.82151 | -0.90269 |
| H | -2.53735 | -1.78596 | -1.90337 |
| C | -2.5741  | -2.08067 | 1.555684 |
| H | -1.78812 | -2.83968 | 1.635186 |
| H | -2.47365 | -1.38997 | 2.399266 |
| H | -3.54346 | -2.58573 | 1.636267 |
| C | 2.297983 | 2.811389 | -1.50318 |
| H | 1.517107 | 3.576573 | -1.57567 |
| H | 3.270412 | 3.309149 | -1.59285 |
| H | 2.185095 | 2.121656 | -2.34605 |
| C | 2.356098 | 3.039898 | 0.996335 |
| H | 2.287504 | 2.515776 | 1.955254 |
| H | 3.328317 | 3.543507 | 0.947123 |
| H | 1.573817 | 3.806315 | 0.964687 |
| C | 8.786491 | -3.63994 | -0.39283 |
| H | 9.827265 | -3.93696 | -0.45867 |
| C | 7.779216 | -4.52766 | -0.52073 |
| C | -9.05474 | 4.31091  | -0.43843 |
| H | -10.0994 | 4.605599 | -0.44976 |
| C | -8.0502  | 5.201604 | -0.63668 |
| C | -8.16259 | 6.657213 | -0.90161 |
| H | -7.72316 | 6.922254 | -1.86885 |
| H | -9.21339 | 6.955194 | -0.90919 |
| H | -7.64402 | 7.244081 | -0.13651 |
| C | 7.863541 | -5.99316 | -0.74143 |
| H | 7.376018 | -6.55017 | 0.066066 |
| H | 7.378402 | -6.28833 | -1.67809 |
| H | 8.910224 | -6.30436 | -0.786   |

|   |          |          |          |
|---|----------|----------|----------|
| S | 6.176785 | -3.77632 | -0.40596 |
| S | -6.45318 | 4.46815  | -0.55331 |
| C | 10.3646  | -0.7344  | -0.01212 |
| C | 10.85532 | 0.475228 | -0.51883 |
| C | 11.29619 | -1.62473 | 0.53708  |
| C | 12.20219 | 0.775707 | -0.49874 |
| H | 10.16765 | 1.183157 | -0.9744  |
| C | 12.64469 | -1.33259 | 0.561975 |
| H | 10.95133 | -2.54783 | 0.993396 |
| C | 13.12953 | -0.12777 | 0.036379 |
| H | 12.54984 | 1.713263 | -0.92088 |
| H | 13.33826 | -2.0365  | 1.010847 |
| N | 14.49668 | 0.156651 | 0.046519 |
| C | 14.97122 | 1.494113 | 0.056845 |
| C | 15.94413 | 1.900825 | -0.85887 |
| C | 14.50113 | 2.415766 | 0.983929 |
| C | 16.42961 | 3.191825 | -0.84193 |
| H | 16.32084 | 1.187505 | -1.58646 |
| C | 14.96765 | 3.724251 | 0.993697 |
| H | 13.75241 | 2.10913  | 1.70894  |
| C | 15.94148 | 4.119098 | 0.080052 |
| H | 17.18643 | 3.51663  | -1.54906 |
| H | 14.57458 | 4.418354 | 1.727397 |
| C | 15.45354 | -0.89228 | -0.00334 |
| C | 16.49382 | -0.93996 | 0.914703 |
| C | 15.38432 | -1.87423 | -0.99454 |
| C | 17.45633 | -1.94095 | 0.856583 |
| H | 16.55685 | -0.1765  | 1.685245 |
| C | 16.32345 | -2.88245 | -1.04847 |
| H | 14.58058 | -1.83933 | -1.72471 |
| C | 17.37044 | -2.92425 | -0.12481 |
| H | 18.25852 | -1.94908 | 1.585854 |
| H | 16.27971 | -3.65133 | -1.81333 |
| O | 18.2436  | -3.94723 | -0.26844 |
| O | 16.47093 | 5.362361 | 0.008478 |
| C | 19.30873 | -4.03976 | 0.651153 |
| H | 18.94328 | -4.16344 | 1.678196 |
| H | 19.88475 | -4.92068 | 0.369524 |
| H | 19.95896 | -3.15721 | 0.605566 |
| C | 16.00149 | 6.333428 | 0.917177 |
| H | 16.54123 | 7.252959 | 0.69266  |
| H | 14.92528 | 6.509918 | 0.796624 |
| H | 16.20248 | 6.043888 | 1.956217 |
| C | -15.4423 | -3.76022 | 0.263927 |
| H | -15.2444 | -4.81169 | 0.438655 |
| C | -15.9618 | -1.04977 | -0.24273 |
| H | -16.2013 | -0.02239 | -0.47478 |
| C | -16.9597 | -1.99196 | -0.35866 |

|    |          |          |          |
|----|----------|----------|----------|
| C  | -16.7087 | -3.34833 | -0.0934  |
| S  | -12.7561 | -3.17993 | 0.698036 |
| Cl | -17.9638 | -4.53564 | -0.23777 |
| Cl | -18.5399 | -1.46414 | -0.84749 |

**Table S5:** Cartesian coordinates of ATTD5.

| Atom | X-axis   | Y-axis   | Z-axis   |
|------|----------|----------|----------|
| C    | 0.991879 | -1.00829 | -0.22681 |
| C    | -0.29273 | -0.50253 | -0.21442 |
| C    | -0.52014 | 0.890271 | -0.24209 |
| C    | 0.536392 | 1.803169 | -0.28631 |
| C    | 1.817826 | 1.29877  | -0.29788 |
| C    | 2.047261 | -0.09718 | -0.26618 |
| H    | 1.178054 | -2.08    | -0.2037  |
| H    | 0.349902 | 2.875079 | -0.30736 |
| C    | 3.476233 | -0.27388 | -0.27754 |
| C    | 4.124847 | 0.934783 | -0.31587 |
| C    | 5.522254 | 0.822288 | -0.31741 |
| H    | 6.211649 | 1.660854 | -0.34487 |
| C    | -2.59943 | -0.14412 | -0.16135 |
| C    | -3.98693 | -0.02373 | -0.11423 |
| C    | -4.40726 | 1.298964 | -0.12256 |
| H    | -4.67889 | -0.85972 | -0.07378 |
| S    | 4.575352 | -1.60137 | -0.23989 |
| S    | -3.02977 | 2.399749 | -0.19353 |
| C    | -1.94713 | 1.070155 | -0.20742 |
| C    | 5.944784 | -0.49284 | -0.27649 |
| C    | 3.130017 | 2.067221 | -0.33569 |
| C    | -1.60236 | -1.27512 | -0.16821 |
| C    | 9.191421 | -2.39667 | -0.19835 |
| C    | 7.770258 | -2.28372 | -0.22142 |
| C    | 7.286934 | -0.99621 | -0.25098 |
| S    | 8.644229 | 0.109973 | -0.23301 |
| C    | -8.2707  | 1.986501 | 0.065745 |
| C    | -7.60138 | 3.226247 | -0.0134  |
| C    | -6.2034  | 3.104384 | -0.08831 |
| S    | -7.0819  | 0.682755 | 0.043406 |
| C    | 9.825747 | -1.17104 | -0.20614 |
| C    | -5.74115 | 1.795349 | -0.07093 |
| C    | -9.65986 | 1.921442 | 0.16849  |
| C    | -10.581  | 0.898934 | 0.276925 |
| H    | -10.083  | 2.920489 | 0.139508 |
| C    | -12.0187 | 1.041295 | 0.429568 |
| C    | -12.7192 | 2.188993 | 0.735693 |
| C    | -13.677  | -2.38351 | 0.19302  |
| C    | -13.8649 | -0.98366 | 0.20828  |
| C    | -12.598  | -0.31481 | 0.336288 |
| C    | -11.5647 | -1.20967 | 0.335255 |

|   |          |          |          |
|---|----------|----------|----------|
| C | -10.2604 | -0.53009 | 0.283814 |
| C | -14.081  | 2.208892 | 1.132756 |
| N | -15.1743 | 2.294105 | 1.499032 |
| C | -12.1306 | 3.481196 | 0.810673 |
| N | -11.6971 | 4.551419 | 0.87072  |
| O | -9.17125 | -1.06572 | 0.240656 |
| C | -1.77011 | -2.15493 | -1.40697 |
| H | -0.99519 | -2.92863 | -1.4367  |
| H | -2.7469  | -2.65164 | -1.3926  |
| H | -1.69893 | -1.56009 | -2.32343 |
| C | -1.70731 | -2.11642 | 1.103324 |
| H | -0.93203 | -2.89016 | 1.11792  |
| H | -1.59027 | -1.49411 | 1.996453 |
| H | -2.68323 | -2.61258 | 1.153256 |
| C | 3.252902 | 2.892847 | -1.61602 |
| H | 2.481727 | 3.670397 | -1.64977 |
| H | 4.232304 | 3.382868 | -1.66084 |
| H | 3.143634 | 2.259581 | -2.50248 |
| C | 3.28493  | 2.962371 | 0.893407 |
| H | 3.198888 | 2.379563 | 1.816363 |
| H | 4.264782 | 3.453385 | 0.88591  |
| H | 2.514495 | 3.741237 | 0.903638 |
| C | 9.623331 | -3.76615 | -0.22276 |
| H | 10.66034 | -4.08302 | -0.23771 |
| C | 8.602981 | -4.64763 | -0.24395 |
| C | -8.03471 | 4.581073 | -0.01751 |
| H | -9.06794 | 4.908002 | 0.043652 |
| C | -7.00259 | 5.459435 | -0.0945  |
| C | -7.06894 | 6.941435 | -0.11902 |
| H | -6.62592 | 7.346315 | -1.03484 |
| H | -8.10971 | 7.268666 | -0.06705 |
| H | -6.52794 | 7.379609 | 0.726047 |
| C | 8.664891 | -6.13036 | -0.27369 |
| H | 8.167846 | -6.57162 | 0.59711  |
| H | 8.176552 | -6.53604 | -1.16639 |
| H | 9.706889 | -6.45979 | -0.27458 |
| S | 7.011809 | -3.86307 | -0.24306 |
| S | -5.4324  | 4.671161 | -0.16704 |
| C | 11.24466 | -0.86025 | -0.16656 |
| C | 11.7711  | 0.267029 | -0.80954 |
| C | 12.14008 | -1.67663 | 0.535632 |
| C | 13.11798 | 0.562361 | -0.76248 |
| H | 11.11203 | 0.910214 | -1.38722 |
| C | 13.48907 | -1.38753 | 0.590333 |
| H | 11.76253 | -2.53153 | 1.08916  |
| C | 14.00848 | -0.26019 | -0.05927 |
| H | 13.49642 | 1.434474 | -1.28642 |
| H | 14.15198 | -2.02815 | 1.16333  |

|   |          |          |          |
|---|----------|----------|----------|
| N | 15.3705  | 0.042408 | -0.00524 |
| C | 15.8189  | 1.388412 | -0.07862 |
| C | 16.82517 | 1.743882 | -0.97871 |
| C | 15.28961 | 2.365808 | 0.75425  |
| C | 17.28738 | 3.04225  | -1.03745 |
| H | 17.24574 | 0.984644 | -1.63226 |
| C | 15.73362 | 3.680466 | 0.687891 |
| H | 14.51254 | 2.09769  | 1.464661 |
| C | 16.74243 | 4.024526 | -0.20804 |
| H | 18.07042 | 3.329782 | -1.73199 |
| H | 15.29684 | 4.420366 | 1.348468 |
| C | 16.34109 | -0.97413 | 0.192342 |
| C | 17.31702 | -0.83467 | 1.170282 |
| C | 16.35491 | -2.11632 | -0.61232 |
| C | 18.29596 | -1.80394 | 1.350249 |
| H | 17.31662 | 0.052069 | 1.798091 |
| C | 17.31047 | -3.09362 | -0.42666 |
| H | 15.60362 | -2.23259 | -1.38836 |
| C | 18.29317 | -2.94563 | 0.554729 |
| H | 19.04605 | -1.65998 | 2.119027 |
| H | 17.33004 | -3.98467 | -1.04627 |
| O | 19.19206 | -3.95253 | 0.652622 |
| O | 17.25529 | 5.268867 | -0.34602 |
| C | 20.19874 | -3.84283 | 1.634296 |
| H | 19.7721  | -3.79226 | 2.643846 |
| H | 20.81142 | -4.73987 | 1.55073  |
| H | 20.82919 | -2.96066 | 1.467134 |
| C | 16.74311 | 6.288717 | 0.48273  |
| H | 17.28331 | 7.198571 | 0.222963 |
| H | 15.67083 | 6.445816 | 0.311238 |
| H | 16.90664 | 6.064146 | 1.54415  |
| C | -14.7404 | -3.26901 | 0.080168 |
| H | -14.5636 | -4.33783 | 0.086841 |
| C | -15.1715 | -0.51491 | 0.020746 |
| H | -15.3652 | 0.545691 | -0.03279 |
| C | -16.2355 | -1.38396 | -0.09718 |
| C | -16.0236 | -2.78235 | -0.05895 |
| S | -11.9967 | -2.85983 | 0.270487 |
| C | -17.1342 | -3.79961 | -0.1206  |
| C | -17.5917 | -0.76241 | -0.31714 |
| F | -16.6597 | -5.02232 | -0.37382 |
| F | -18.0248 | -3.52842 | -1.07439 |
| F | -17.793  | -3.87881 | 1.038354 |
| F | -17.9804 | -0.86199 | -1.59194 |
| F | -18.5347 | -1.32978 | 0.437048 |
| F | -17.5901 | 0.537026 | -0.01852 |

**Table S6:** Cartesian coordinates of ATTD6.

| <b>Atom</b> | <b>X-axis</b> | <b>Y-axis</b> | <b>Z-axis</b> |
|-------------|---------------|---------------|---------------|
| C           | -1.38674      | -0.84903      | 0.381327      |
| C           | -0.10479      | -0.33691      | 0.369936      |
| C           | 0.116917      | 1.055944      | 0.43008       |
| C           | -0.94361      | 1.962778      | 0.500365      |
| C           | -2.22265      | 1.452109      | 0.508582      |
| C           | -2.44552      | 0.055928      | 0.450369      |
| H           | -1.56811      | -1.92083      | 0.335652      |
| H           | -0.76197      | 3.034834      | 0.544133      |
| C           | -3.87329      | -0.12899      | 0.469608      |
| C           | -4.52775      | 1.075215      | 0.535278      |
| C           | -5.92478      | 0.953289      | 0.566125      |
| H           | -6.62094      | 1.783867      | 0.634325      |
| C           | 2.199144      | 0.031759      | 0.311222      |
| C           | 3.585821      | 0.157149      | 0.270515      |
| C           | 4.002218      | 1.480121      | 0.323022      |
| H           | 4.281266      | -0.6752       | 0.218393      |
| S           | -4.96438      | -1.4632       | 0.431103      |
| S           | 2.622494      | 2.575164      | 0.423976      |
| C           | 1.543246      | 1.242546      | 0.394802      |
| C           | -6.33798      | -0.36389      | 0.518391      |
| C           | -3.53871      | 2.21247       | 0.570622      |
| C           | 1.206927      | -1.10282      | 0.294121      |
| C           | -9.5751       | -2.27947      | 0.634367      |
| C           | -8.15774      | -2.15008      | 0.710352      |
| C           | -7.67667      | -0.87802      | 0.505478      |
| S           | -9.02778      | 0.185113      | 0.176769      |
| C           | 7.862493      | 2.168138      | 0.112891      |
| C           | 7.211632      | 3.379799      | 0.435421      |
| C           | 5.815551      | 3.259055      | 0.527296      |
| S           | 6.654271      | 0.897403      | -0.08846      |
| C           | -10.2079      | -1.08405      | 0.356452      |
| C           | 5.336144      | 1.976363      | 0.294182      |
| C           | 9.249179      | 2.099309      | 0.012645      |
| C           | 10.15411      | 1.095333      | -0.28007      |
| H           | 9.690242      | 3.065236      | 0.23979       |
| C           | 11.59773      | 1.227134      | -0.34029      |
| C           | 12.34173      | 2.388096      | -0.33953      |
| C           | 13.17624      | -2.19963      | -0.89186      |
| C           | 13.38546      | -0.84885      | -0.53104      |
| C           | 12.14402      | -0.12963      | -0.5513       |
| C           | 11.09693      | -0.96495      | -0.82013      |
| C           | 9.803247      | -0.27844      | -0.64126      |
| C           | 13.72095      | 2.441875      | -0.66818      |
| N           | 14.83402      | 2.548691      | -0.96241      |
| C           | 11.7921       | 3.682801      | -0.13425      |
| N           | 11.38898      | 4.752555      | 0.038618      |
| O           | 8.704131      | -0.77838      | -0.76608      |

|   |          |          |          |
|---|----------|----------|----------|
| C | 1.38717  | -2.0156  | 1.50691  |
| H | 0.615688 | -2.79309 | 1.520428 |
| H | 2.365681 | -2.50782 | 1.471783 |
| H | 1.320021 | -1.44689 | 2.440121 |
| C | 1.305944 | -1.90835 | -1.00101 |
| H | 0.535023 | -2.68599 | -1.03076 |
| H | 1.17791  | -1.26226 | -1.87554 |
| H | 2.284264 | -2.39708 | -1.07255 |
| C | -3.65767 | 3.010012 | 1.869125 |
| H | -2.89118 | 3.791622 | 1.914257 |
| H | -4.63965 | 3.492914 | 1.931244 |
| H | -3.5383  | 2.358586 | 2.741008 |
| C | -3.70632 | 3.13258  | -0.63809 |
| H | -3.62224 | 2.5704   | -1.57394 |
| H | -4.68911 | 3.617092 | -0.61407 |
| H | -2.94069 | 3.916209 | -0.63589 |
| C | -10.0091 | -3.61665 | 0.930377 |
| H | -11.0449 | -3.93586 | 0.961046 |
| C | -8.9923  | -4.46212 | 1.195132 |
| C | 7.667311 | 4.700336 | 0.69856  |
| H | 8.704072 | 5.021139 | 0.674526 |
| C | 6.65168  | 5.555757 | 0.983374 |
| C | 6.743081 | 7.001945 | 1.302074 |
| H | 6.335912 | 7.218771 | 2.294979 |
| H | 7.786735 | 7.323263 | 1.281459 |
| H | 6.182701 | 7.605963 | 0.58113  |
| C | -9.05747 | -5.90461 | 1.539354 |
| H | -8.51317 | -6.51667 | 0.812037 |
| H | -8.61944 | -6.1039  | 2.523328 |
| H | -10.098  | -6.23833 | 1.554953 |
| S | -7.40276 | -3.68039 | 1.109868 |
| S | 5.072411 | 4.7849   | 0.946372 |
| C | -11.6239 | -0.80914 | 0.180378 |
| C | -12.1888 | 0.424878 | 0.526415 |
| C | -12.479  | -1.77943 | -0.35742 |
| C | -13.5357 | 0.674534 | 0.358617 |
| H | -11.5633 | 1.195308 | 0.970099 |
| C | -13.8271 | -1.53803 | -0.52851 |
| H | -12.0682 | -2.72855 | -0.68906 |
| C | -14.3867 | -0.3055  | -0.16842 |
| H | -13.9467 | 1.634596 | 0.654913 |
| H | -14.4589 | -2.30467 | -0.96579 |
| N | -15.7525 | -0.05928 | -0.33103 |
| C | -16.2281 | 1.24908  | -0.6102  |
| C | -17.2877 | 1.782532 | 0.126537 |
| C | -15.675  | 2.008829 | -1.63322 |
| C | -17.7798 | 3.038468 | -0.16136 |
| H | -17.7275 | 1.195203 | 0.927605 |



|   |          |          |          |
|---|----------|----------|----------|
| C | -16.1498 | 3.283574 | -1.9163  |
| H | -14.856  | 1.599858 | -2.2182  |
| C | -17.213  | 3.80306  | -1.18302 |
| H | -18.6052 | 3.462036 | 0.402176 |
| H | -15.6936 | 3.851415 | -2.71875 |
| C | -16.6948 | -1.11852 | -0.27321 |
| C | -17.6636 | -1.25595 | -1.25844 |
| C | -16.6869 | -2.02414 | 0.791458 |
| C | -18.615  | -2.26708 | -1.19445 |
| H | -17.6801 | -0.5547  | -2.08807 |
| C | -17.6122 | -3.04482 | 0.850534 |
| H | -15.9423 | -1.92017 | 1.575741 |
| C | -18.5885 | -3.1744  | -0.13955 |
| H | -19.3619 | -2.34261 | -1.97665 |
| H | -17.6138 | -3.75387 | 1.672397 |
| O | -19.4572 | -4.20019 | 0.016164 |
| O | -17.7625 | 5.02332  | -1.38262 |
| C | -20.4564 | -4.3707  | -0.96412 |
| H | -20.0212 | -4.55674 | -1.95397 |
| H | -21.0407 | -5.23957 | -0.66277 |
| H | -21.1171 | -3.49667 | -1.0215  |
| C | -17.2338 | 5.825467 | -2.41493 |
| H | -17.8099 | 6.750206 | -2.41374 |
| H | -16.1765 | 6.061049 | -2.24041 |
| H | -17.3359 | 5.340045 | -3.39365 |
| C | 14.21594 | -3.12003 | -0.95105 |
| H | 14.02948 | -4.14968 | -1.23655 |
| C | 14.68289 | -0.48354 | -0.15213 |
| H | 14.8935  | 0.518243 | 0.194439 |
| C | 15.71632 | -1.39424 | -0.19271 |
| C | 15.49566 | -2.72447 | -0.62344 |
| S | 11.49628 | -2.58938 | -1.16159 |
| S | 16.65396 | -4.09638 | -0.52644 |
| O | 16.95393 | -4.32994 | 0.867008 |
| O | 16.132   | -5.15308 | -1.34908 |
| O | 17.96258 | -3.58557 | -1.27876 |
| H | 18.52165 | -3.07504 | -0.66175 |
| S | 17.30526 | -0.62052 | 0.090205 |
| O | 17.95686 | -0.40522 | -1.17183 |
| O | 17.12832 | 0.441729 | 1.042612 |
| O | 18.18782 | -1.79336 | 0.76615  |
| H | 17.93078 | -1.99047 | 1.681208 |

**Table S7:** Cartesian coordinates of ATTD7.

| <b>Atom</b> | <b>X-axis</b> | <b>Y-axis</b> | <b>Z-axis</b> |
|-------------|---------------|---------------|---------------|
| C           | 0.101856      | -1.03693      | -0.04097      |
| C           | 1.3965        | -0.55828      | -0.03027      |
| C           | 1.654513      | 0.827115      | 0.055888      |

|   |          |          |          |
|---|----------|----------|----------|
| C | 0.616698 | 1.759833 | 0.130953 |
| C | -0.67517 | 1.28237  | 0.12077  |
| C | -0.93382 | -0.10632 | 0.036344 |
| H | -0.10632 | -2.10289 | -0.10522 |
| H | 0.825252 | 2.825842 | 0.196639 |
| C | -2.36573 | -0.25457 | 0.051701 |
| C | -2.98911 | 0.964616 | 0.143469 |
| C | -4.38799 | 0.877752 | 0.186392 |
| H | -5.0613  | 1.724979 | 0.2759   |
| C | 3.709296 | -0.25338 | -0.04091 |
| C | 5.0989   | -0.16897 | -0.04366 |
| C | 5.553118 | 1.139306 | 0.045565 |
| H | 5.769748 | -1.02121 | -0.09652 |
| S | -3.49131 | -1.55961 | 0.001072 |
| S | 4.204235 | 2.273523 | 0.131077 |
| C | 3.086204 | 0.974548 | 0.049044 |
| C | -4.83576 | -0.42753 | 0.122398 |
| C | -1.97119 | 2.075564 | 0.194029 |
| C | 2.687121 | -1.35912 | -0.09877 |
| C | -8.11771 | -2.26285 | 0.275498 |
| C | -6.6949  | -2.17475 | 0.290478 |
| C | -6.18699 | -0.90654 | 0.131599 |
| S | -7.52131 | 0.208261 | -0.07531 |
| C | 9.440298 | 1.6904   | -0.00518 |
| C | 8.818997 | 2.932871 | 0.251916 |
| C | 7.416515 | 2.86175  | 0.287211 |
| S | 8.197353 | 0.455128 | -0.21785 |
| C | -8.72792 | -1.03729 | 0.094301 |
| C | 6.902534 | 1.590689 | 0.066864 |
| C | 10.82697 | 1.569483 | -0.04767 |
| C | 11.70371 | 0.521324 | -0.25959 |
| H | 11.29455 | 2.527623 | 0.158127 |
| C | 13.15367 | 0.592579 | -0.26892 |
| C | 13.94031 | 1.724078 | -0.30989 |
| C | 14.59957 | -2.93259 | -0.49216 |
| C | 14.86189 | -1.56092 | -0.23359 |
| C | 13.65341 | -0.79528 | -0.36965 |
| C | 12.58199 | -1.60385 | -0.62476 |
| C | 11.31371 | -0.85695 | -0.55446 |
| C | 15.32933 | 1.708931 | -0.59629 |
| N | 16.45326 | 1.761818 | -0.86186 |
| C | 13.4305  | 3.046717 | -0.20145 |
| N | 13.05818 | 4.137129 | -0.10565 |
| O | 10.20173 | -1.32137 | -0.70273 |
| C | 2.820205 | -2.30102 | 1.097528 |
| H | 2.028052 | -3.0574  | 1.080556 |
| H | 3.785514 | -2.81909 | 1.069589 |
| H | 2.750999 | -1.75    | 2.041118 |

|   |          |          |          |
|---|----------|----------|----------|
| C | 2.787523 | -2.1407  | -1.40847 |
| H | 1.996241 | -2.89593 | -1.46784 |
| H | 2.693409 | -1.47359 | -2.27149 |
| H | 3.753286 | -2.65482 | -1.47276 |
| C | -2.06967 | 2.85809  | 1.503226 |
| H | -1.28432 | 3.62008  | 1.558368 |
| H | -3.03939 | 3.364237 | 1.572679 |
| H | -1.96613 | 2.192206 | 2.366187 |
| C | -2.11488 | 3.016155 | -1.00193 |
| H | -2.0445  | 2.464941 | -1.94539 |
| H | -3.08505 | 3.525126 | -0.97138 |
| H | -1.32931 | 3.779715 | -0.98837 |
| C | -8.57545 | -3.60223 | 0.521216 |
| H | -9.61768 | -3.89532 | 0.581592 |
| C | -7.5721  | -4.48682 | 0.693687 |
| C | 9.307617 | 4.24638  | 0.490712 |
| H | 10.3547  | 4.53259  | 0.498413 |
| C | 8.310693 | 5.143816 | 0.703959 |
| C | 8.437229 | 6.596074 | 0.980053 |
| H | 8.005416 | 6.856823 | 1.951825 |
| H | 9.490539 | 6.884893 | 0.98407  |
| H | 7.919375 | 7.193341 | 0.222616 |
| C | -7.66238 | -5.94369 | 0.963539 |
| H | -7.16388 | -6.52898 | 0.183244 |
| H | -7.19171 | -6.20674 | 1.917011 |
| H | -8.71016 | -6.25175 | 1.003582 |
| S | -5.96657 | -3.74246 | 0.576278 |
| S | 6.709037 | 4.423668 | 0.625672 |
| C | -10.1421 | -0.7107  | 0.023614 |
| C | -10.6426 | 0.511072 | 0.489949 |
| C | -11.0634 | -1.61699 | -0.51676 |
| C | -11.9896 | 0.807616 | 0.440845 |
| H | -9.96307 | 1.232126 | 0.937157 |
| C | -12.4116 | -1.32884 | -0.57115 |
| H | -10.7094 | -2.55105 | -0.94282 |
| C | -12.9071 | -0.11184 | -0.08427 |
| H | -12.3456 | 1.755034 | 0.832825 |
| H | -13.0965 | -2.04582 | -1.01251 |
| N | -14.2742 | 0.168629 | -0.12238 |
| C | -14.7516 | 1.504843 | -0.15947 |
| C | -15.7306 | 1.925418 | 0.743235 |
| C | -14.278  | 2.410841 | -1.09989 |
| C | -16.2185 | 3.214941 | 0.700825 |
| H | -16.1103 | 1.224189 | 1.48097  |
| C | -14.7473 | 3.717876 | -1.13574 |
| H | -13.5242 | 2.092704 | -1.81464 |
| C | -15.7271 | 4.126905 | -0.23471 |
| H | -16.98   | 3.550685 | 1.397744 |

|   |          |          |          |
|---|----------|----------|----------|
| H | -14.3511 | 4.399086 | -1.87979 |
| C | -15.2305 | -0.88072 | -0.06872 |
| C | -16.2565 | -0.94486 | -1.0016  |
| C | -15.1766 | -1.84495 | 0.94077  |
| C | -17.2195 | -1.94525 | -0.94109 |
| H | -16.3079 | -0.19484 | -1.78609 |
| C | -16.1159 | -2.85292 | 0.997333 |
| H | -14.385  | -1.79641 | 1.683342 |
| C | -17.1481 | -2.91169 | 0.058139 |
| H | -18.0104 | -1.96642 | -1.68228 |
| H | -16.0838 | -3.6083  | 1.776098 |
| O | -18.0227 | -3.9328  | 0.205557 |
| O | -16.2597 | 5.369831 | -0.18808 |
| C | -19.0732 | -4.04191 | -0.72905 |
| H | -18.6914 | -4.18191 | -1.74799 |
| H | -19.6526 | -4.91881 | -0.44202 |
| H | -19.7248 | -3.15945 | -0.7081  |
| C | -15.7885 | 6.326114 | -1.1116  |
| H | -16.3321 | 7.247773 | -0.90602 |
| H | -14.7135 | 6.508221 | -0.98883 |
| H | -15.9836 | 6.017749 | -2.14631 |
| C | 15.58546 | -3.90715 | -0.43183 |
| H | 15.36144 | -4.94469 | -0.65206 |
| C | 16.15484 | -1.21678 | 0.181148 |
| H | 16.40633 | -0.20103 | 0.45131  |
| C | 17.13982 | -2.18314 | 0.263629 |
| C | 16.86476 | -3.53455 | -0.06207 |
| S | 12.91545 | -3.2656  | -0.8171  |
| C | 18.44881 | -1.81133 | 0.691865 |
| N | 19.5083  | -1.51685 | 1.039679 |
| C | 17.89181 | -4.51916 | 0.014025 |
| N | 18.72035 | -5.31956 | 0.073742 |

**Table S8:** Cartesian coordinates of ATTD8.

| <b>Atom</b> | <b>X-axis</b> | <b>Y-axis</b> | <b>Z-axis</b> |
|-------------|---------------|---------------|---------------|
| C           | -0.93259      | -0.95893      | 0.477394      |
| C           | 0.357253      | -0.46669      | 0.471895      |
| C           | 0.599775      | 0.923328      | 0.508118      |
| C           | -0.44732      | 1.846784      | 0.55115       |
| C           | -1.73452      | 1.355727      | 0.554192      |
| C           | -1.97832      | -0.0371       | 0.5172        |
| H           | -1.12975      | -2.02856      | 0.448577      |
| H           | -0.24995      | 2.916622      | 0.577847      |
| C           | -3.40964      | -0.199        | 0.520209      |
| C           | -4.04556      | 1.016144      | 0.557794      |
| C           | -5.44475      | 0.917158      | 0.567892      |
| H           | -6.12786      | 1.760247      | 0.610758      |

|   |          |          |          |
|---|----------|----------|----------|
| C | 2.667367 | -0.13389 | 0.428671 |
| C | 4.057617 | -0.03087 | 0.393873 |
| C | 4.493401 | 1.285133 | 0.419098 |
| H | 4.740331 | -0.87476 | 0.361917 |
| S | -4.52188 | -1.51569 | 0.483192 |
| S | 3.13083  | 2.403306 | 0.487085 |
| C | 2.029977 | 1.087049 | 0.481715 |
| C | -5.87897 | -0.39334 | 0.531771 |
| C | -3.03881 | 2.137929 | 0.587709 |
| C | 1.658052 | -1.25358 | 0.425187 |
| C | -9.14709 | -2.25825 | 0.594469 |
| C | -7.72893 | -2.15137 | 0.690005 |
| C | -7.22571 | -0.8854  | 0.502465 |
| S | -8.5565  | 0.202048 | 0.169509 |
| C | 8.361314 | 1.924455 | 0.174252 |
| C | 7.726727 | 3.150211 | 0.460823 |
| C | 6.328712 | 3.046105 | 0.569735 |
| S | 7.142062 | 0.658439 | 0.035582 |
| C | -9.75782 | -1.05064 | 0.321372 |
| C | 5.835483 | 1.764165 | 0.378037 |
| C | 9.747762 | 1.84822  | 0.020711 |
| C | 10.63889 | 0.834927 | -0.25831 |
| H | 10.19434 | 2.824795 | 0.179342 |
| C | 12.07806 | 0.964369 | -0.42388 |
| C | 12.79937 | 2.127015 | -0.59418 |
| C | 13.66282 | -2.49258 | -0.68306 |
| C | 13.87869 | -1.10345 | -0.50804 |
| C | 12.62296 | -0.40264 | -0.52531 |
| C | 11.56891 | -1.26666 | -0.63257 |
| C | 10.28395 | -0.57346 | -0.46185 |
| C | 14.15115 | 2.173511 | -1.02445 |
| N | 15.23441 | 2.292301 | -1.41055 |
| C | 12.23851 | 3.429136 | -0.48583 |
| N | 11.82796 | 4.506381 | -0.39594 |
| O | 9.180878 | -1.08153 | -0.47364 |
| C | 1.811989 | -2.14333 | 1.658575 |
| H | 1.028233 | -2.90834 | 1.680641 |
| H | 2.783049 | -2.65118 | 1.643913 |
| H | 1.744634 | -1.55382 | 2.578764 |
| C | 1.757897 | -2.08791 | -0.8514  |
| H | 0.974813 | -2.85361 | -0.87332 |
| H | 1.650023 | -1.45865 | -1.74083 |
| H | 2.728919 | -2.5936  | -0.90169 |
| C | -3.16041 | 2.958521 | 1.871478 |
| H | -2.38071 | 3.727117 | 1.91386  |
| H | -4.13444 | 3.459477 | 1.912917 |
| H | -3.0638  | 2.319562 | 2.755339 |
| C | -3.17685 | 3.040871 | -0.63757 |

|   |          |          |          |
|---|----------|----------|----------|
| H | -3.0911  | 2.461994 | -1.56302 |
| H | -4.15162 | 3.541972 | -0.6334  |
| H | -2.39826 | 3.811672 | -0.6389  |
| C | -9.60568 | -3.59151 | 0.869363 |
| H | -10.6468 | -3.89437 | 0.881176 |
| C | -8.60554 | -4.4553  | 1.138673 |
| C | 8.195698 | 4.477212 | 0.669975 |
| H | 9.234712 | 4.787732 | 0.622453 |
| C | 7.191435 | 5.351028 | 0.933568 |
| C | 7.298029 | 6.806598 | 1.201127 |
| H | 6.90171  | 7.061278 | 2.189533 |
| H | 8.344192 | 7.117889 | 1.160308 |
| H | 6.736448 | 7.390624 | 0.464709 |
| C | -8.69766 | -5.90034 | 1.465644 |
| H | -8.15363 | -6.5128  | 0.738439 |
| H | -8.2756  | -6.11754 | 2.45281  |
| H | -9.74345 | -6.21761 | 1.46411  |
| S | -7.00302 | -3.69747 | 1.083629 |
| S | 5.603272 | 4.593901 | 0.940065 |
| C | -11.1674 | -0.75415 | 0.12894  |
| C | -11.7258 | 0.475817 | 0.497884 |
| C | -12.0224 | -1.70167 | -0.44814 |
| C | -13.0677 | 0.743003 | 0.315394 |
| H | -11.1001 | 1.227547 | 0.972366 |
| C | -13.3644 | -1.44156 | -0.63679 |
| H | -11.6147 | -2.64683 | -0.79484 |
| C | -13.9185 | -0.21344 | -0.25297 |
| H | -13.4737 | 1.698254 | 0.632666 |
| H | -13.9965 | -2.1899  | -1.10453 |
| N | -15.2809 | 0.043647 | -0.43132 |
| C | -15.7598 | 1.362716 | -0.64047 |
| C | -16.8577 | 1.833203 | 0.083871 |
| C | -15.173  | 2.200457 | -1.58093 |
| C | -17.3525 | 3.10208  | -0.13437 |
| H | -17.3259 | 1.185079 | 0.81924  |
| C | -15.6501 | 3.488462 | -1.79053 |
| H | -14.3248 | 1.843968 | -2.15839 |
| C | -16.7505 | 3.944746 | -1.07038 |
| H | -18.2073 | 3.474975 | 0.421046 |
| H | -15.1661 | 4.117686 | -2.52856 |
| C | -16.2261 | -1.01478 | -0.38617 |
| C | -17.1841 | -1.1477  | -1.38234 |
| C | -16.2316 | -1.92171 | 0.676959 |
| C | -18.1389 | -2.15609 | -1.33011 |
| H | -17.1895 | -0.44456 | -2.21054 |
| C | -17.1603 | -2.93992 | 0.724881 |
| H | -15.4944 | -1.82072 | 1.468525 |
| C | -18.1262 | -3.06484 | -0.27588 |

|   |          |          |          |
|---|----------|----------|----------|
| H | -18.8777 | -2.22888 | -2.1203  |
| H | -17.1727 | -3.65058 | 1.545229 |
| O | -18.999  | -4.08834 | -0.13091 |
| O | -17.3041 | 5.17247  | -1.20565 |
| C | -19.9895 | -4.25437 | -1.12082 |
| H | -19.5457 | -4.44096 | -2.10668 |
| H | -20.5796 | -5.12151 | -0.82583 |
| H | -20.6466 | -3.37794 | -1.1834  |
| C | -16.7397 | 6.049623 | -2.15452 |
| H | -17.3258 | 6.967283 | -2.11466 |
| H | -15.6939 | 6.281468 | -1.9171  |
| H | -16.793  | 5.633427 | -3.16834 |
| C | 14.70876 | -3.40782 | -0.70364 |
| H | 14.52417 | -4.46606 | -0.85971 |
| C | 15.18981 | -0.68277 | -0.2523  |
| H | 15.40648 | 0.348566 | -0.01525 |
| C | 16.23476 | -1.58691 | -0.26214 |
| C | 15.99742 | -2.95172 | -0.52556 |
| S | 11.96962 | -2.91837 | -0.80369 |
| C | 17.59632 | -1.15002 | 0.148885 |
| O | 18.43711 | -1.89013 | 0.594937 |
| O | 17.76488 | 0.161499 | 0.000732 |
| C | 17.09847 | -3.9554  | -0.61688 |
| O | 17.14508 | -4.96238 | 0.037245 |
| O | 17.97131 | -3.62274 | -1.56482 |
| C | 19.02076 | 0.683063 | 0.435342 |
| H | 19.15806 | 0.508182 | 1.504905 |
| H | 19.83972 | 0.21257  | -0.11292 |
| H | 18.98819 | 1.75019  | 0.226625 |
| C | 19.14914 | -4.42713 | -1.61937 |
| H | 19.71335 | -4.30848 | -0.69019 |
| H | 18.89583 | -5.47978 | -1.76044 |
| H | 19.72871 | -4.05804 | -2.46294 |

**Table S9:** Calculated energies ( $E$ ) and energy gap ( $\Delta E$ ) of HOMO-1, LUMO+1, HOMO-2 and LUMO+2 for ATTR1 and ATTD2-ATTD8 at M06/6-31G (d,p).

| Compounds | HOMO-1 | LUMO+1 | $\Delta E$ | HOMO-2 | LUMO+2 | $\Delta E$ |
|-----------|--------|--------|------------|--------|--------|------------|
| ATTR1     | -6.071 | -3.217 | 2.854      | -6.713 | -2.604 | 4.109      |
| ATTD2     | -5.588 | -2.517 | 3.071      | -5.95  | -2.034 | 3.916      |
| ATTD3     | -5.629 | -3.27  | 2.359      | -6.009 | -2.836 | 3.173      |
| ATTD4     | -5.586 | -2.957 | 2.629      | -5.948 | -2.033 | 3.915      |
| ATTD5     | -5.604 | -3.047 | 2.557      | -5.974 | -2.074 | 3.9        |
| ATTD6     | -5.624 | -3.169 | 2.455      | -6.004 | -2.204 | 3.8        |
| ATTD7     | -5.631 | -3.177 | 2.454      | -6.003 | -2.281 | 3.722      |
| ATTD8     | -5.575 | -2.959 | 2.616      | -5.943 | -2.040 | 3.903      |

$E$ =energy,  $\Delta E$  (eV) =  $E_{\text{LUMO}} - E_{\text{HOMO}}$ ; HOMO=highest occupied molecular orbital; LUMO=lowest unoccupied molecular orbital, MO=molecular orbital, Units in eV

**Table S10:** Wavelength, excitation energy and oscillator strength of **ATTR1** in chloroform solvent at M06/6-311G (d,p) level.

| NO | DFT<br>$\lambda$ (nm) | $E$ (eV) | $f_{os}$ | MO contributions                                               |
|----|-----------------------|----------|----------|----------------------------------------------------------------|
| 1  | 751.510               | 1.650    | 3.297    | H→L (93%), H-1→L+1 (5%)                                        |
| 2  | 620.666               | 1.998    | 0.003    | H→L+1 (90%), H-1→L (8%)                                        |
| 3  | 559.394               | 2.216    | 0.002    | H-1→L (88%), H-2→L+1 (3%), H→L+1 (8%)                          |
| 4  | 507.176               | 2.445    | 0.053    | H-1→L+1 (54%), H→L+2 (32%), H-2→L (3%), H-1→L+3 (6%), H→L (2%) |
| 5  | 498.429               | 2.488    | 0.272    | H-1→L+1 (35%), H→L+2 (50%), H-1→L+3 (8%), H→L (3%)             |
| 6  | 491.708               | 2.522    | 0.001    | H-1→L+2 (16%), H→L+3 (79%)                                     |

MO=molecular orbital, H=HOMO, L=LUMO,  $f_{os}$ = oscillator strength, wavelength= $\lambda$  (nm)

**Table S11:** Wavelength, excitation energy and oscillator strength of **ATTD2** in chloroform solvent at M06/6-311G (d,p) level.

| NO | DFT<br>$\lambda$ (nm) | $E$ (eV) | $f_{os}$ | MO contributions                                     |
|----|-----------------------|----------|----------|------------------------------------------------------|
| 1  | 818.864               | 1.514    | 1.578    | H→L (92%), H-1→L (6%)                                |
| 2  | 637.385               | 1.945    | 0.871    | H-2→L (12%), H-1→L (78%), H→L (7%)                   |
| 3  | 551.580               | 2.248    | 0.249    | H-1→L+1 (10%), H→L+1 (79%), H-2→L+1 (3%), H→L+2 (5%) |
| 4  | 531.984               | 2.331    | 0.115    | H-2→L (82%), H-1→L (13%), H-3→L (4%)                 |
| 5  | 499.775               | 2.481    | 0.700    | H→L+2 (85%), H-1→L+1 (3%), H→L+1 (3%), H→L+3 (3%)    |
| 6  | 472.789               | 2.622    | 0.043    | H-2→L+1 (19%), H-1→L+1 (59%), H→L+1 (17%)            |

MO=molecular orbital, H=HOMO, L=LUMO,  $f_{os}$ = oscillator strength, wavelength= $\lambda$  (nm)

**Table S12:** Wavelength, excitation energy and oscillator strength of **ATTD3** in chloroform solvent at M06/6-311G (d,p) level.

| NO | DFT<br>$\lambda$ (nm) | $E$ (eV) | $f_{os}$ | MO contributions                                                                |
|----|-----------------------|----------|----------|---------------------------------------------------------------------------------|
| 1  | 846.944               | 1.464    | 1.399    | H→L (92%), H-1→L (5%)                                                           |
| 2  | 781.052               | 1.587    | 0.035    | H→L+1 (88%), H-2→L+1 (3%), H-1→L+1 (8%)                                         |
| 3  | 655.446               | 1.892    | 0.797    | H-2→L (12%), H-1→L (65%), H-2→L+1 (3%), H-1→L+1 (7%), H→L (6%), H→L+1 (2%)      |
| 4  | 636.306               | 1.949    | 0.350    | H-2→L+1 (16%), H-1→L+1 (49%), H→L+1 (10%), H-1→L (8%), H-1→L+2 (2%), H→L+2 (9%) |
| 5  | 600.030               | 2.066    | 0.044    | H→L+2 (84%), H-1→L (5%), H-1→L+1 (7%)                                           |
| 6  | 542.719               | 2.285    | 0.190    | H-2→L (77%), H-1→L (14%), H-3→L (4%)                                            |

MO=molecular orbital, H=HOMO, L=LUMO,  $f_{os}$ = oscillator strength, wavelength= $\lambda$  (nm)

**Table S13:** Wavelength, excitation energy and oscillator strength of **ATTD4** in chloroform solvent at M06/6-311G (d,p) level.

| NO | DFT<br>$\lambda$ (nm) | $E$ (eV) | $f_{os}$ | MO contributions |
|----|-----------------------|----------|----------|------------------|
|----|-----------------------|----------|----------|------------------|



|   |         |       |       |                                                       |
|---|---------|-------|-------|-------------------------------------------------------|
| 1 | 799.434 | 1.551 | 1.465 | H→L (88%), H-1→L (8%)                                 |
| 2 | 690.835 | 1.795 | 0.324 | H-1→L+1 (13%), H→L+1 (78%), H-2→L+1 (4%)              |
| 3 | 632.766 | 1.959 | 0.635 | H-2→L (14%), H-1→L (68%), H→L (11%), H→L+1 (3%)       |
| 4 | 570.514 | 2.173 | 0.296 | H-2→L+1 (16%), H-1→L+1 (59%), H→L+1 (17%), H-1→L (3%) |
| 5 | 520.133 | 2.384 | 0.125 | H-2→L (76%), H-1→L (16%), H-3→L (4%)                  |
| 6 | 503.612 | 2.462 | 0.832 | H→L+2 (90%), H→L+3 (3%)                               |

MO=molecular orbital, H=HOMO, L=LUMO,  $f_{os}$ = oscillator strength, wavelength=  $\lambda$  (nm)

**Table S14:** Wavelength, excitation energy and oscillator strength of **ATTD5** in chloroform solvent at M06/6-311G (d,p) level.

| NO | DFT<br>$\lambda$ (nm) | $E$ (eV) | $f_{os}$ | MO contributions                                      |
|----|-----------------------|----------|----------|-------------------------------------------------------|
| 1  | 816.169               | 1.519    | 1.474    | H→L (90%), H-1→L (6%)                                 |
| 2  | 713.825               | 1.737    | 0.262    | H-1→L+1 (11%), H→L+1 (82%), H-2→L+1 (4%)              |
| 3  | 638.337               | 1.942    | 0.640    | H-2→L (15%), H-1→L (70%), H→L (9%), H→L+1 (2%)        |
| 4  | 584.170               | 2.122    | 0.291    | H-2→L+1 (18%), H-1→L+1 (60%), H→L+1 (14%), H-1→L (4%) |
| 5  | 528.627               | 2.345    | 0.159    | H-2→L (75%), H-1→L (17%), H-3→L (4%)                  |
| 6  | 506.079               | 2.450    | 0.812    | H→L+2 (87%), H→L+3 (6%)                               |

MO=molecular orbital, H=HOMO, L=LUMO,  $f_{os}$ = oscillator strength, wavelength=  $\lambda$  (nm)

**Table S15:** Wavelength, excitation energy and oscillator strength of **ATTD6** in chloroform solvent at M06/6-311G (d,p) level.

| NO | DFT<br>$\lambda$ (nm) | $E$ (eV) | $f_{os}$ | MO contributions                                      |
|----|-----------------------|----------|----------|-------------------------------------------------------|
| 1  | 835.698               | 1.484    | 1.368    | H→L (90%), H-1→L (6%)                                 |
| 2  | 749.104               | 1.655    | 0.216    | H→L+1 (85%), H-2→L+1 (3%), H-1→L+1 (9%)               |
| 3  | 651.725               | 1.902    | 0.658    | H-2→L (16%), H-1→L (69%), H→L (8%)                    |
| 4  | 609.349               | 2.035    | 0.387    | H-2→L+1 (19%), H-1→L+1 (61%), H→L+1 (12%), H-1→L (4%) |
| 5  | 539.296               | 2.299    | 0.181    | H-2→L (75%), H-1→L (18%), H-3→L (4%)                  |
| 6  | 509.887               | 2.432    | 0.819    | H→L+2 (53%), H→L+3 (34%), H-1→L+1 (4%), H→L+4 (2%)    |

MO=molecular orbital, H=HOMO, L=LUMO,  $f_{os}$ = oscillator strength, wavelength=  $\lambda$  (nm)

**Table S16:** Wavelength, excitation energy and oscillator strength of **ATTD7** in chloroform solvent at M06/6-311G (d,p) level.

| NO | DFT<br>$\lambda$ (nm) | $E$ (eV) | $f_{os}$ | MO contributions                                      |
|----|-----------------------|----------|----------|-------------------------------------------------------|
| 1  | 836.093               | 1.483    | 1.431    | H→L (90%), H-1→L (6%)                                 |
| 2  | 754.850               | 1.643    | 0.201    | H→L+1 (85%), H-2→L+1 (3%), H-1→L+1 (9%)               |
| 3  | 649.302               | 1.910    | 0.622    | H-2→L (15%), H-1→L (68%), H→L (8%)                    |
| 4  | 610.910               | 2.030    | 0.416    | H-2→L+1 (18%), H-1→L+1 (61%), H→L+1 (11%), H-1→L (6%) |

|   |         |       |       |                                                    |
|---|---------|-------|-------|----------------------------------------------------|
| 5 | 535.916 | 2.314 | 0.169 | H-2→L (75%), H-1→L (18%), H-3→L (4%)               |
| 6 | 512.458 | 2.419 | 0.755 | H→L+2 (46%), H→L+3 (42%), H-1→L+1 (3%), H→L+4 (3%) |

MO=molecular orbital, H=HOMO, L=LUMO,  $f_{os}$  = oscillator strength, wavelength=  $\lambda$  (nm)

**Table S17:** Wavelength, excitation energy and oscillator strength of **ATTD8** in chloroform solvent at M06/6-311G (d,p) level.

| NO | DFT<br>$\lambda$ (nm) | $E$ (eV) | $f_{os}$ | MO contributions                                      |
|----|-----------------------|----------|----------|-------------------------------------------------------|
| 1  | 796.558               | 1.557    | 1.439    | H→L (88%), H-1→L (8%)                                 |
| 2  | 688.419               | 1.801    | 0.308    | H-1→L+1 (13%), H→L+1 (79%), H-2→L+1 (4%)              |
| 3  | 633.445               | 1.957    | 0.657    | H-2→L (15%), H-1→L (68%), H→L (11%), H→L+1 (3%)       |
| 4  | 571.277               | 2.170    | 0.286    | H-2→L+1 (17%), H-1→L+1 (58%), H→L+1 (17%), H-1→L (3%) |
| 5  | 523.339               | 2.369    | 0.147    | H-2→L (75%), H-1→L (17%), H-3→L (4%)                  |
| 6  | 503.407               | 2.463    | 0.842    | H→L+2 (87%), H→L+3 (4%)                               |

MO=molecular orbital, H=HOMO, L=LUMO,  $f_{os}$  = oscillator strength, wavelength=  $\lambda$  (nm)

**Table S18:** Wave length  $\lambda$  (nm), excitation energy ( $E$ ) and oscillator strength ( $f$ ) of **ATTR1** in gaseous phase at M06/6-311G (d,p) level.

| NO | DFT<br>$\lambda$ (nm) | $E$ (eV) | $f_{os}$ | MO contributions           |
|----|-----------------------|----------|----------|----------------------------|
| 1  | 695.057               | 1.784    | 3.007    | H→L (95%), H-1→L+1 (4%)    |
| 2  | 579.041               | 2.141    | 0.001    | H→L+1 (97%)                |
| 3  | 540.095               | 2.296    | 0.003    | H-1→L (95%), H-2→L+1 (3%)  |
| 4  | 489.456               | 2.533    | 0.215    | H-1→L+1 (92%), H→L (4%)    |
| 5  | 479.277               | 2.587    | 0.080    | H-1→L+3 (14%), H→L+2 (81%) |
| 6  | 470.368               | 2.636    | 0.001    | H-1→L+2 (16%), H→L+3 (78%) |

MO=molecular orbital, H=HOMO, L=LUMO,  $f_{os}$  = oscillator strength, wavelength=  $\lambda$  (nm)

**Table S19:** Wave length  $\lambda$  (nm), excitation energy ( $E$ ) and oscillator strength ( $f$ ) of **ATTD2** in gaseous phase at M06/6-311G (d,p) level.

| NO | DFT<br>$\lambda$ (nm) | $E$ (eV) | $f_{os}$ | MO contributions                                                |
|----|-----------------------|----------|----------|-----------------------------------------------------------------|
| 1  | 767.181               | 1.616    | 1.310    | H→L (96%), H-1→L (2%)                                           |
| 2  | 600.204               | 2.066    | 1.118    | H-1→L (85%), H-2→L (6%), H→L (3%), H→L+2 (3%)                   |
| 3  | 526.293               | 2.356    | 0.265    | H→L+1 (76%), H-2→L+1 (2%), H-1→L (3%), H-1→L+1 (9%), H→L+2 (5%) |
| 4  | 511.359               | 2.425    | 0.109    | H-2→L (83%), H-3→L (2%), H-1→L (7%), H→L+1 (4%)                 |
| 5  | 481.548               | 2.575    | 0.501    | H→L+2 (82%), H-2→L (5%), H→L+1 (3%), H→L+3 (2%)                 |
| 6  | 454.338               | 2.729    | 0.027    | H-2→L+1 (16%), H-1→L+1 (63%), H→L+1 (15%)                       |

MO=molecular orbital, H=HOMO, L=LUMO,  $f_{os}$  = oscillator strength, wavelength=  $\lambda$  (nm)

**Table S20:** Wavelength, excitation energy and oscillator strength of **ATTD3** in gaseous phase at M06/6-311G (d,p) level.

| NO | DFT<br>$\lambda$ (nm) | $E$ (eV) | $f_{os}$ | MO contributions                                                           |
|----|-----------------------|----------|----------|----------------------------------------------------------------------------|
| 1  | 832.444               | 1.489    | 1.035    | H→L (97%)                                                                  |
| 2  | 772.295               | 1.605    | 0.045    | H→L+1 (92%), H-2→L+1 (2%), H-1→L+1 (5%)                                    |
| 3  | 634.417               | 1.954    | 0.627    | H-1→L (57%), H-1→L+1 (17%), H-2→L (8%), H-2→L+1 (9%), H→L (2%), H→L+1 (3%) |
| 4  | 616.960               | 2.010    | 0.679    | H-2→L+1 (14%), H-1→L (27%), H-1→L+1 (46%), H→L+1 (5%), H→L+2 (2%)          |
| 5  | 555.410               | 2.232    | 0.164    | H→L+2 (86%), H-2→L (3%), H-1→L (5%)                                        |
| 6  | 534.968               | 2.318    | 0.308    | H-2→L (75%), H-1→L (8%), H-1→L+1 (4%), H→L+2 (6%)                          |

MO=molecular orbital, H=HOMO, L=LUMO,  $f_{os}$ = oscillator strength, wavelength=  $\lambda$  (nm)

**Table S21:** Wavelength, excitation energy and oscillator strength of **ATTD4** in gaseous phase at M06/6-311G (d,p) level.

| NO | DFT<br>$\lambda$ (nm) | $E$ (eV) | $f_{os}$ | MO contributions                                                  |
|----|-----------------------|----------|----------|-------------------------------------------------------------------|
| 1  | 765.098               | 1.621    | 1.215    | H→L (94%), H-1→L (3%)                                             |
| 2  | 670.402               | 1.849    | 0.216    | H-1→L+1 (11%), H→L+1 (81%), H-2→L+1 (3%)                          |
| 3  | 603.711               | 2.054    | 0.827    | H-2→L (10%), H-1→L (72%), H→L (5%), H→L+1 (5%), H→L+2 (3%)        |
| 4  | 555.087               | 2.234    | 0.436    | H-2→L+1 (15%), H-1→L+1 (58%), H→L+1 (13%), H-1→L (8%), H→L+2 (2%) |
| 5  | 507.010               | 2.445    | 0.317    | H-2→L (73%), H-1→L (13%), H-3→L (2%), H→L+2 (9%)                  |
| 6  | 484.749               | 2.558    | 0.488    | H-2→L (10%), H→L+2 (79%), H-1→L+1 (4%), H→L+3 (3%)                |

MO=molecular orbital, H=HOMO, L=LUMO,  $f_{os}$ = oscillator strength, wavelength=  $\lambda$  (nm)

**Table S22:** Wavelength, excitation energy and oscillator strength of **ATTD5** in gaseous phase at M06/6-311G (d,p) level.

| NO | DFT<br>$\lambda$ (nm) | $E$ (eV) | $f_{os}$ | MO contributions                                                                       |
|----|-----------------------|----------|----------|----------------------------------------------------------------------------------------|
| 1  | 790.212               | 1.569    | 1.169    | H→L (96%), H-1→L (2%)                                                                  |
| 2  | 702.102               | 1.766    | 0.170    | H→L+1 (86%), H-2→L+1 (3%), H-1→L+1 (8%)                                                |
| 3  | 613.297               | 2.022    | 0.801    | H-2→L (11%), H-1→L (72%), H-2→L+1 (3%), H-1→L+1 (3%), H→L (4%), H→L+1 (3%), H→L+2 (2%) |
| 4  | 573.178               | 2.163    | 0.432    | H-2→L+1 (17%), H-1→L (10%), H-1→L+1 (57%), H→L+1 (10%)                                 |
| 5  | 519.654               | 2.386    | 0.381    | H-2→L (73%), H-1→L (13%), H→L+2 (8%)                                                   |
| 6  | 488.608               | 2.538    | 0.487    | H→L+2 (72%), H-2→L (8%), H-2→L+1 (3%), H-1→L+1 (8%), H→L+3 (4%)                        |

MO=molecular orbital, H=HOMO, L=LUMO,  $f_{os}$ = oscillator strength, wavelength=  $\lambda$  (nm)

**Table S23:** Wavelength, excitation energy and oscillator strength of **ATTD6** in gaseous phase at M06/6-311G (d,p) level.

| NO | DFT<br>$\lambda$ (nm) | $E$ (eV) | $f_{os}$ | MO contributions                                                           |
|----|-----------------------|----------|----------|----------------------------------------------------------------------------|
| 1  | 822.122               | 1.508    | 1.041    | H→L (97%), H-1→L (2%)                                                      |
| 2  | 746.713               | 1.660    | 0.121    | H→L+1 (90%), H-2→L+1 (2%), H-1→L+1 (6%)                                    |
| 3  | 630.161               | 1.968    | 0.735    | H-2→L (10%), H-1→L (68%), H-2→L+1 (5%), H-1→L+1 (6%), H→L (3%), H→L+1 (3%) |
| 4  | 600.902               | 2.063    | 0.552    | H-2→L+1 (17%), H-1→L (15%), H-1→L+1 (56%), H→L+1 (7%)                      |
| 5  | 533.908               | 2.322    | 0.462    | H-2→L (74%), H-1→L (13%), H→L+2 (5%), H→L+3 (2%)                           |
| 6  | 505.418               | 2.453    | 0.169    | H-2→L+1 (55%), H-1→L+1 (29%), H-3→L+1 (3%), H→L+2 (8%), H→L+3 (3%)         |

MO=molecular orbital, H=HOMO, L=LUMO,  $f_{os}$ = oscillator strength, wavelength=  $\lambda$  (nm)

**Table S24:** Wavelength, excitation energy and oscillator strength of **ATTD7** in gaseous phase at M06/6-311G (d,p) level.

| NO | DFT<br>$\lambda$ (nm) | $E$ (eV) | $f_{os}$ | MO contributions                                                           |
|----|-----------------------|----------|----------|----------------------------------------------------------------------------|
| 1  | 822.940               | 1.507    | 1.073    | H→L (97%)                                                                  |
| 2  | 753.245               | 1.646    | 0.134    | H→L+1 (90%), H-2→L+1 (2%), H-1→L+1 (6%)                                    |
| 3  | 629.553               | 1.969    | 0.629    | H-2→L (10%), H-1→L (63%), H-2→L+1 (7%), H-1→L+1 (9%), H→L (3%), H→L+1 (3%) |
| 4  | 601.252               | 2.062    | 0.676    | H-2→L+1 (15%), H-1→L (20%), H-1→L+1 (54%), H→L+1 (6%)                      |
| 5  | 531.573               | 2.332    | 0.424    | H-2→L (74%), H-1→L (13%), H-3→L (2%), H→L+2 (5%), H→L+3 (3%)               |
| 6  | 504.760               | 2.456    | 0.184    | H-2→L+1 (52%), H-1→L+1 (28%), H→L+2 (10%), H-3→L+1 (3%), H→L+3 (4%)        |

MO=molecular orbital, H=HOMO, L=LUMO,  $f_{os}$ = oscillator strength, wavelength=  $\lambda$  (nm)

**Table S25:** Wavelength, excitation energy and oscillator strength of **ATTD8** in gaseous phase at M06/6-311G (d,p) level.

| NO | DFT<br>$\lambda$ (nm) | $E$ (eV) | $f_{os}$ | MO contributions                                           |
|----|-----------------------|----------|----------|------------------------------------------------------------|
| 1  | 757.850               | 1.636    | 1.234    | H→L (94%), H-1→L (4%)                                      |
| 2  | 659.420               | 1.880    | 0.191    | H-1→L+1 (12%), H→L+1 (80%), H-2→L+1 (4%)                   |
| 3  | 601.427               | 2.062    | 0.892    | H-2→L (10%), H-1→L (72%), H→L (5%), H→L+1 (5%), H→L+2 (3%) |
| 4  | 550.747               | 2.251    | 0.360    | H-2→L+1 (16%), H-1→L+1 (56%), H→L+1 (15%), H-1→L (7%)      |
| 5  | 507.861               | 2.441    | 0.347    | H-2→L (72%), H-1→L (13%), H-3→L (2%), H→L+2 (9%)           |
| 6  | 484.389               | 2.560    | 0.497    | H-2→L (10%), H→L+2 (78%), H-1→L+1 (4%), H→L+3 (3%)         |

**Table S26:** Natural bond orbitals analysis for the reference compound (**ATTR1**) with its representative values

| Donor( <i>i</i> ) | Type     | Acceptor( <i>j</i> ) | Type       | <i>E</i> (2)<br>[kcal/mol] | <i>E</i> ( <i>j</i> )- <i>E</i> ( <i>i</i> )<br>[a.u.] | <i>F</i> ( <i>i</i> , <i>j</i> )<br>[a.u.] |
|-------------------|----------|----------------------|------------|----------------------------|--------------------------------------------------------|--------------------------------------------|
| C23-C31           | $\pi$    | C33-C54              | $\pi^*$    | 33.74                      | 0.3                                                    | 0.091                                      |
| C33-C54           | $\pi$    | C56-C57              | $\pi^*$    | 29.03                      | 0.29                                                   | 0.083                                      |
| C34-C35           | $\pi$    | C47-O52              | $\pi^*$    | 24.88                      | 0.3                                                    | 0.08                                       |
| C43-C44           | $\pi$    | C41-C42              | $\pi^*$    | 21.8                       | 0.3                                                    | 0.073                                      |
| C9-C10            | $\pi$    | C11-C20              | $\pi^*$    | 20.07                      | 0.3                                                    | 0.071                                      |
| C60-C61           | $\pi$    | C55-O58              | $\pi^*$    | 19.2                       | 0.3                                                    | 0.07                                       |
| C11-C20           | $\pi$    | C9-C10               | $\pi^*$    | 18.5                       | 0.32                                                   | 0.071                                      |
| C23-C31           | $\pi$    | C24-C25              | $\pi^*$    | 15.05                      | 0.27                                                   | 0.059                                      |
| C24-C25           | $\pi$    | C11-C20              | $\pi^*$    | 13.26                      | 0.31                                                   | 0.059                                      |
| C33-C54           | $\pi$    | C23-C31              | $\pi^*$    | 11.96                      | 0.29                                                   | 0.055                                      |
| C27-C28           | $\pi$    | C90-C92              | $\pi^*$    | 11.64                      | 0.31                                                   | 0.055                                      |
| C56-C57           | $\pi$    | C59-C64              | $\pi^*$    | 8.83                       | 0.33                                                   | 0.05                                       |
| C37-C38           | $\pi$    | C34-C35              | $\pi^*$    | 8.06                       | 0.33                                                   | 0.047                                      |
| C55-O58           | $\pi$    | C60-C61              | $\pi^*$    | 4.05                       | 0.44                                                   | 0.041                                      |
| C47-O52           | $\pi$    | C34-C35              | $\pi^*$    | 3.59                       | 0.42                                                   | 0.038                                      |
| C48-N49           | $\pi$    | C50-N51              | $\pi^*$    | 0.83                       | 0.47                                                   | 0.018                                      |
| C67-N68           | $\pi$    | C69-N70              | $\pi^*$    | 0.78                       | 0.48                                                   | 0.017                                      |
| C33-H53           | $\sigma$ | S26-C31              | $\sigma^*$ | 10.71                      | 0.72                                                   | 0.078                                      |
| C25-S26           | $\sigma$ | C24-S101             | $\sigma^*$ | 8.72                       | 0.86                                                   | 0.077                                      |
| C69-N70           | $\sigma$ | C57-C69              | $\sigma^*$ | 8.08                       | 1.57                                                   | 0.101                                      |
| C67-N68           | $\sigma$ | C57-C67              | $\sigma^*$ | 7.97                       | 1.58                                                   | 0.101                                      |
| C97-H100          | $\sigma$ | C89-S101             | $\sigma^*$ | 7.49                       | 0.71                                                   | 0.065                                      |
| C11-C20           | $\sigma$ | C10-C21              | $\sigma^*$ | 6.76                       | 1.18                                                   | 0.08                                       |
| C23-C24           | $\sigma$ | C24-C25              | $\sigma^*$ | 5.96                       | 1.27                                                   | 0.078                                      |
| C40-C41           | $\sigma$ | C37-C42              | $\sigma^*$ | 5.77                       | 1.19                                                   | 0.074                                      |
| C2-C3             | $\sigma$ | C3-C4                | $\sigma^*$ | 5.18                       | 1.25                                                   | 0.072                                      |
| C10-C11           | $\sigma$ | C20-C25              | $\sigma^*$ | 4.94                       | 1.24                                                   | 0.07                                       |
| C1-H7             | $\sigma$ | C5-C6                | $\sigma^*$ | 4.67                       | 1.08                                                   | 0.064                                      |
| C93-H94           | $\sigma$ | C90-C92              | $\sigma^*$ | 4.3                        | 0.54                                                   | 0.046                                      |
| C63-H105          | $\sigma$ | C61-C62              | $\sigma^*$ | 4.09                       | 1.1                                                    | 0.06                                       |
| C64-H66           | $\sigma$ | C62-C63              | $\sigma^*$ | 3.92                       | 1.11                                                   | 0.059                                      |
| C28-C29           | $\sigma$ | C27-C34              | $\sigma^*$ | 3.66                       | 1.27                                                   | 0.061                                      |
| C11-H12           | $\sigma$ | C9-C10               | $\sigma^*$ | 3.08                       | 1.11                                                   | 0.052                                      |
| C56-C57           | $\sigma$ | C59-C60              | $\sigma^*$ | 1.03                       | 1.33                                                   | 0.033                                      |
| C89-C97           | $\sigma$ | C97-H100             | $\sigma^*$ | 0.57                       | 1.08                                                   | 0.022                                      |
| S17-C20           | $\sigma$ | C11-C20              | $\sigma^*$ | 0.53                       | 1.22                                                   | 0.023                                      |
| C67-N68           | $\sigma$ | C56-C57              | $\sigma^*$ | 0.5                        | 1.65                                                   | 0.026                                      |
| S26               | LP(2)    | C24-C25              | $\pi^*$    | 28.61                      | 0.25                                                   | 0.078                                      |
| S18               | LP(2)    | C14-C15              | $\pi^*$    | 22.8                       | 0.27                                                   | 0.071                                      |
| S30               | LP(2)    | C27-C28              | $\pi^*$    | 19.08                      | 0.27                                                   | 0.066                                      |
| O52               | LP(2)    | C43-C47              | $\sigma^*$ | 20.79                      | 0.76                                                   | 0.114                                      |
| O52               | LP(2)    | C35-C47              | $\sigma^*$ | 18.06                      | 0.76                                                   | 0.106                                      |
| S30               | LP(1)    | C27-C34              | $\sigma^*$ | 0.52                       | 1.23                                                   | 0.023                                      |

| Donor( <i>i</i> ) | Type     | Acceptor( <i>j</i> ) | Type       | <i>E</i> (2)<br>[kcal/mol] | <i>E</i> ( <i>j</i> )- <i>E</i> ( <i>i</i> )<br>[a.u.] | <i>F</i> ( <i>i</i> , <i>j</i> )<br>[a.u.] |
|-------------------|----------|----------------------|------------|----------------------------|--------------------------------------------------------|--------------------------------------------|
| C27-C28           | $\pi$    | C33-C34              | $\pi^*$    | 34.84                      | 0.3                                                    | 0.092                                      |
| C33-C34           | $\pi$    | C36-C37              | $\pi^*$    | 29.88                      | 0.29                                                   | 0.084                                      |
| C89-C93           | $\pi$    | C86-C87              | $\pi^*$    | 25.67                      | 0.3                                                    | 0.079                                      |
| C39-C40           | $\pi$    | C41-C42              | $\pi^*$    | 23.5                       | 0.3                                                    | 0.075                                      |
| C107-C108         | $\pi$    | C109-C112            | $\pi^*$    | 22.55                      | 0.31                                                   | 0.074                                      |
| C86-C87           | $\pi$    | C89-C93              | $\pi^*$    | 20.98                      | 0.29                                                   | 0.07                                       |
| C11-C20           | $\pi$    | C9-C10               | $\pi^*$    | 19.65                      | 0.32                                                   | 0.074                                      |
| C5-C6             | $\pi$    | C1-C2                | $\pi^*$    | 18.84                      | 0.3                                                    | 0.069                                      |
| C23-C31           | $\pi$    | C24-C25              | $\pi^*$    | 17.02                      | 0.29                                                   | 0.067                                      |
| C29-C32           | $\pi$    | C14-C15              | $\pi^*$    | 13.21                      | 0.31                                                   | 0.059                                      |
| C23-C31           | $\pi$    | C86-C87              | $\pi^*$    | 10.52                      | 0.32                                                   | 0.054                                      |
| C36-C37           | $\pi$    | C41-C42              | $\pi^*$    | 8.12                       | 0.33                                                   | 0.048                                      |
| C46-O51           | $\pi$    | C41-C42              | $\pi^*$    | 4.03                       | 0.43                                                   | 0.041                                      |
| C46-O51           | $\pi$    | C33-C34              | $\pi^*$    | 3.56                       | 0.42                                                   | 0.038                                      |
| C47-N48           | $\pi$    | C49-N50              | $\pi^*$    | 0.84                       | 0.47                                                   | 0.018                                      |
| C49-N50           | $\pi$    | C47-N48              | $\pi^*$    | 0.79                       | 0.48                                                   | 0.017                                      |
| C107-C108         | $\pi$    | C97-C99              | $\pi^*$    | 0.76                       | 0.3                                                    | 0.014                                      |
| C33-H35           | $\sigma$ | C27-S30              | $\sigma^*$ | 10.85                      | 0.72                                                   | 0.079                                      |
| C25-S26           | $\sigma$ | C24-S82              | $\sigma^*$ | 9.2                        | 0.86                                                   | 0.079                                      |
| S30-C32           | $\sigma$ | C29-S83              | $\sigma^*$ | 8.7                        | 0.86                                                   | 0.077                                      |
| C2-C3             | $\sigma$ | S18-C19              | $\sigma^*$ | 7.85                       | 0.89                                                   | 0.075                                      |
| C68-H69           | $\sigma$ | C70-S82              | $\sigma^*$ | 6.9                        | 0.72                                                   | 0.063                                      |
| C23-C24           | $\sigma$ | C20-C25              | $\sigma^*$ | 6.11                       | 1.21                                                   | 0.077                                      |
| C14-C15           | $\sigma$ | C15-C32              | $\sigma^*$ | 5.84                       | 1.27                                                   | 0.077                                      |
| S30-C32           | $\sigma$ | C15-S18              | $\sigma^*$ | 5.74                       | 0.85                                                   | 0.062                                      |
| C68-C70           | $\sigma$ | C23-C31              | $\sigma^*$ | 5.19                       | 1.35                                                   | 0.075                                      |
| C70-S82           | $\sigma$ | C24-C25              | $\sigma^*$ | 4.98                       | 1.24                                                   | 0.07                                       |
| C99-H103          | $\sigma$ | C97-C98              | $\sigma^*$ | 4.84                       | 1.1                                                    | 0.065                                      |
| C109-H113         | $\sigma$ | C107-C108            | $\sigma^*$ | 4.64                       | 1.11                                                   | 0.064                                      |
| C97-C98           | $\sigma$ | C98-C100             | $\sigma^*$ | 3.96                       | 1.31                                                   | 0.065                                      |
| C38-H85           | $\sigma$ | C42-C43              | $\sigma^*$ | 3.79                       | 1.13                                                   | 0.058                                      |
| C24-S82           | $\sigma$ | C70-C78              | $\sigma^*$ | 2.98                       | 1.12                                                   | 0.052                                      |
| C24-C25           | $\sigma$ | C11-C20              | $\sigma^*$ | 2.37                       | 1.33                                                   | 0.05                                       |
| C34-C46           | $\sigma$ | C46-O51              | $\sigma^*$ | 1.99                       | 1.25                                                   | 0.045                                      |
| C5-C21            | $\sigma$ | C9-S17               | $\sigma^*$ | 0.61                       | 0.83                                                   | 0.02                                       |
| C123-H126         | $\sigma$ | C104-O118            | $\sigma^*$ | 0.54                       | 0.91                                                   | 0.02                                       |
| C73-S83           | $\sigma$ | C28-C29              | $\sigma^*$ | 0.51                       | 1.2                                                    | 0.022                                      |
| O118              | LP(2)    | C102-C104            | $\pi^*$    | 32.47                      | 0.36                                                   | 0.103                                      |
| S83               | LP(2)    | C71-C73              | $\pi^*$    | 24.45                      | 0.29                                                   | 0.076                                      |
| S30               | LP(2)    | C33-C34              | $\pi^*$    | 0.52                       | 0.28                                                   | 0.011                                      |
| O51               | LP(2)    | C42-C46              | $\sigma^*$ | 20.86                      | 0.76                                                   | 0.114                                      |
| N50               | LP(1)    | C37-C49              | $\sigma^*$ | 12.49                      | 1.05                                                   | 0.102                                      |
| S83               | LP(1)    | S18-C19              | $\sigma^*$ | 0.52                       | 0.89                                                   | 0.019                                      |

**Table S27:** Natural bond orbitals analysis for ATTD2 with its representative values

**Table S28:** Natural bond orbitals analysis for **ATTD3** with its representative values

| Donor( <i>i</i> ) | Type     | Acceptor( <i>j</i> ) | Type       | <i>E</i> (2)<br>[kcal/mol] | <i>E</i> ( <i>j</i> )- <i>E</i> ( <i>i</i> )<br>[a.u.] | <i>F</i> ( <i>i,j</i> )<br>[a.u.] |
|-------------------|----------|----------------------|------------|----------------------------|--------------------------------------------------------|-----------------------------------|
| C27-C28           | $\pi$    | C33-C34              | $\pi^*$    | 36.23                      | 0.3                                                    | 0.093                             |
| C33-C34           | $\pi$    | C36-C37              | $\pi^*$    | 28.21                      | 0.29                                                   | 0.081                             |
| C83-C87           | $\pi$    | C80-C81              | $\pi^*$    | 25.61                      | 0.3                                                    | 0.079                             |
| C80-C81           | $\pi$    | C82-C85              | $\pi^*$    | 22.59                      | 0.3                                                    | 0.074                             |
| C123-C125         | $\pi$    | C121-C126            | $\pi^*$    | 20.37                      | 0.31                                                   | 0.072                             |
| C92-C94           | $\pi$    | C91-C93              | $\pi^*$    | 19.33                      | 0.3                                                    | 0.07                              |
| C40-C41           | $\pi$    | C36-C37              | $\pi^*$    | 18.95                      | 0.32                                                   | 0.071                             |
| C14-C15           | $\pi$    | C13-C19              | $\pi^*$    | 17.99                      | 0.32                                                   | 0.07                              |
| C11-C20           | $\pi$    | C24-C25              | $\pi^*$    | 15.62                      | 0.29                                                   | 0.065                             |
| C29-C32           | $\pi$    | C14-C15              | $\pi^*$    | 12.96                      | 0.31                                                   | 0.058                             |
| C23-C31           | $\pi$    | C80-C81              | $\pi^*$    | 10.72                      | 0.32                                                   | 0.054                             |
| C36-C37           | $\pi$    | C33-C34              | $\pi^*$    | 7.76                       | 0.33                                                   | 0.047                             |
| N131-O132         | $\pi$    | C121-C126            | $\pi^*$    | 2.92                       | 0.52                                                   | 0.038                             |
| C36-C37           | $\pi$    | C43-N44              | $\pi^*$    | 1.16                       | 0.41                                                   | 0.02                              |
| C43-N44           | $\pi$    | C45-N46              | $\pi^*$    | 0.85                       | 0.47                                                   | 0.018                             |
| C45-N46           | $\pi$    | C43-N44              | $\pi^*$    | 0.79                       | 0.47                                                   | 0.017                             |
| C101-C102         | $\pi$    | C91-C93              | $\pi^*$    | 0.76                       | 0.3                                                    | 0.014                             |
| C33-H35           | $\sigma$ | C27-S30              | $\sigma^*$ | 10.77                      | 0.72                                                   | 0.079                             |
| C25-S26           | $\sigma$ | C24-S78              | $\sigma^*$ | 9.19                       | 0.86                                                   | 0.079                             |
| S30-C32           | $\sigma$ | C29-S79              | $\sigma^*$ | 8.64                       | 0.86                                                   | 0.077                             |
| C2-C3             | $\sigma$ | S18-C19              | $\sigma^*$ | 7.86                       | 0.89                                                   | 0.075                             |
| C15-C32           | $\sigma$ | C29-C32              | $\sigma^*$ | 6.87                       | 1.31                                                   | 0.085                             |
| C23-C24           | $\sigma$ | C20-C25              | $\sigma^*$ | 6.08                       | 1.21                                                   | 0.077                             |
| C34-C42           | $\sigma$ | C41-S127             | $\sigma^*$ | 5.88                       | 0.89                                                   | 0.065                             |
| C28-C29           | $\sigma$ | C15-C32              | $\sigma^*$ | 5.62                       | 1.25                                                   | 0.075                             |
| C13-C19           | $\sigma$ | C3-C4                | $\sigma^*$ | 5.05                       | 1.29                                                   | 0.072                             |
| C66-S78           | $\sigma$ | C24-C25              | $\sigma^*$ | 4.97                       | 1.24                                                   | 0.07                              |
| C66-S78           | $\sigma$ | C64-H65              | $\sigma^*$ | 4.53                       | 1.06                                                   | 0.062                             |
| C92-H95           | $\sigma$ | C94-C98              | $\sigma^*$ | 4.07                       | 1.09                                                   | 0.06                              |
| C38-C121          | $\sigma$ | C126-N131            | $\sigma^*$ | 3.98                       | 1.03                                                   | 0.058                             |
| C29-S79           | $\sigma$ | C69-C70              | $\sigma^*$ | 3.18                       | 1.13                                                   | 0.054                             |
| C67-H68           | $\sigma$ | C28-C29              | $\sigma^*$ | 2.86                       | 1.07                                                   | 0.049                             |
| C104-C108         | $\sigma$ | C102-H105            | $\sigma^*$ | 2.28                       | 1.14                                                   | 0.046                             |
| C21-C60           | $\sigma$ | C5-C21               | $\sigma^*$ | 1.99                       | 1.05                                                   | 0.041                             |
| C22-C48           | $\sigma$ | C48-H50              | $\sigma^*$ | 0.6                        | 1.01                                                   | 0.022                             |
| C117-H120         | $\sigma$ | C98-O112             | $\sigma^*$ | 0.53                       | 0.91                                                   | 0.02                              |
| C69-S79           | $\sigma$ | C28-C29              | $\sigma^*$ | 0.51                       | 1.2                                                    | 0.022                             |
| O112              | LP(2)    | C96-C98              | $\pi^*$    | 32.44                      | 0.36                                                   | 0.103                             |
| S26               | LP(2)    | C24-C25              | $\pi^*$    | 22.66                      | 0.27                                                   | 0.071                             |
| S30               | LP(2)    | C33-C34              | $\pi^*$    | 0.54                       | 0.28                                                   | 0.011                             |
| O47               | LP(2)    | C41-C42              | $\sigma^*$ | 22.65                      | 0.74                                                   | 0.117                             |
| N46               | LP(1)    | C37-C45              | $\sigma^*$ | 12.59                      | 1.04                                                   | 0.102                             |
| O129              | LP(2)    | C125-C126            | $\sigma^*$ | 0.5                        | 0.84                                                   | 0.019                             |

**Table S29:** Natural bond orbitals analysis for ATTD4 with its representative values.



| Donor( <i>i</i> ) | Type     | Acceptor( <i>j</i> ) | Type       | <i>E</i> (2)<br>[kcal/mol] | <i>E</i> ( <i>j</i> )- <i>E</i> ( <i>i</i> )<br>[a.u] | <i>F</i> ( <i>i</i> , <i>j</i> )<br>[a.u] |
|-------------------|----------|----------------------|------------|----------------------------|-------------------------------------------------------|-------------------------------------------|
| C27-C28           | $\pi$    | C33-C34              | $\pi^*$    | 34.1                       | 0.3                                                   | 0.091                                     |
| C83-C87           | $\pi$    | C80-C81              | $\pi^*$    | 25.81                      | 0.3                                                   | 0.079                                     |
| C3-C4             | $\pi$    | C5-C6                | $\pi^*$    | 24.76                      | 0.3                                                   | 0.077                                     |
| C80-C81           | $\pi$    | C82-C85              | $\pi^*$    | 22.7                       | 0.3                                                   | 0.074                                     |
| C40-C41           | $\pi$    | C42-O47              | $\pi^*$    | 21.28                      | 0.33                                                  | 0.075                                     |
| C39-C123          | $\pi$    | C40-C41              | $\pi^*$    | 19.5                       | 0.28                                                  | 0.067                                     |
| C104-C108         | $\pi$    | C103-C106            | $\pi^*$    | 18.41                      | 0.31                                                  | 0.068                                     |
| C82-C85           | $\pi$    | C80-C81              | $\pi^*$    | 18.07                      | 0.3                                                   | 0.068                                     |
| C5-C6             | $\pi$    | C9-C10               | $\pi^*$    | 16.18                      | 0.29                                                  | 0.062                                     |
| C9-C10            | $\pi$    | C5-C6                | $\pi^*$    | 15.75                      | 0.32                                                  | 0.066                                     |
| C24-C25           | $\pi$    | C11-C20              | $\pi^*$    | 14.57                      | 0.32                                                  | 0.064                                     |
| C27-C28           | $\pi$    | C67-C69              | $\pi^*$    | 11.57                      | 0.31                                                  | 0.055                                     |
| C36-C37           | $\pi$    | C33-C34              | $\pi^*$    | 7.79                       | 0.33                                                  | 0.047                                     |
| C42-O47           | $\pi$    | C40-C41              | $\pi^*$    | 4.24                       | 0.41                                                  | 0.041                                     |
| C36-C37           | $\pi$    | C43-N44              | $\pi^*$    | 1.17                       | 0.41                                                  | 0.021                                     |
| C43-N44           | $\pi$    | C45-N46              | $\pi^*$    | 0.84                       | 0.47                                                  | 0.018                                     |
| C45-N46           | $\pi$    | C43-N44              | $\pi^*$    | 0.77                       | 0.48                                                  | 0.017                                     |
| C33-H35           | $\sigma$ | C27-S30              | $\sigma^*$ | 10.58                      | 0.72                                                  | 0.078                                     |
| C25-S26           | $\sigma$ | C24-S78              | $\sigma^*$ | 9.21                       | 0.86                                                  | 0.079                                     |
| C37-C45           | $\sigma$ | C45-N46              | $\sigma^*$ | 8.16                       | 1.61                                                  | 0.103                                     |
| C20-C25           | $\sigma$ | C24-C25              | $\sigma^*$ | 7.76                       | 1.33                                                  | 0.091                                     |
| C27-C33           | $\sigma$ | C33-C34              | $\sigma^*$ | 6.89                       | 1.34                                                  | 0.086                                     |
| C23-C24           | $\sigma$ | C20-C25              | $\sigma^*$ | 6.08                       | 1.21                                                  | 0.077                                     |
| C28-C29           | $\sigma$ | C15-C32              | $\sigma^*$ | 5.68                       | 1.24                                                  | 0.075                                     |
| C64-C66           | $\sigma$ | C23-C31              | $\sigma^*$ | 5.19                       | 1.35                                                  | 0.075                                     |
| C66-S78           | $\sigma$ | C24-C25              | $\sigma^*$ | 4.97                       | 1.24                                                  | 0.07                                      |
| C82-H86           | $\sigma$ | C80-C81              | $\sigma^*$ | 4.35                       | 1.09                                                  | 0.062                                     |
| C96-H100          | $\sigma$ | C94-C98              | $\sigma^*$ | 4.04                       | 1.1                                                   | 0.06                                      |
| S18-C19           | $\sigma$ | C13-C22              | $\sigma^*$ | 3.69                       | 1.15                                                  | 0.059                                     |
| C14-H16           | $\sigma$ | C13-C19              | $\sigma^*$ | 3.09                       | 1.11                                                  | 0.052                                     |
| C125-C126         | $\sigma$ | C123-H124            | $\sigma^*$ | 2.02                       | 1.17                                                  | 0.044                                     |
| C10-C21           | $\sigma$ | C60-H63              | $\sigma^*$ | 1.49                       | 1.01                                                  | 0.035                                     |
| C33-C34           | $\sigma$ | C41-C42              | $\sigma^*$ | 1.06                       | 1.19                                                  | 0.032                                     |
| C23-C24           | $\sigma$ | C25-S26              | $\sigma^*$ | 0.56                       | 0.88                                                  | 0.02                                      |
| C117-H120         | $\sigma$ | C98-O112             | $\sigma^*$ | 0.54                       | 0.91                                                  | 0.02                                      |
| S17-C20           | $\sigma$ | C10-C21              | $\sigma^*$ | 0.51                       | 1.11                                                  | 0.021                                     |
| O111              | LP(2)    | C104-C108            | $\pi^*$    | 32.59                      | 0.36                                                  | 0.103                                     |
| S78               | LP(2)    | C64-C66              | $\pi^*$    | 22.01                      | 0.29                                                  | 0.072                                     |
| S30               | LP(2)    | C33-C34              | $\pi^*$    | 0.5                        | 0.28                                                  | 0.011                                     |
| O47               | LP(2)    | C41-C42              | $\sigma^*$ | 22.21                      | 0.74                                                  | 0.116                                     |
| O112              | LP(2)    | C117-H119            | $\sigma^*$ | 6.08                       | 0.69                                                  | 0.06                                      |
| C1128             | LP(2)    | C38-C121             | $\sigma^*$ | 0.5                        | 0.9                                                   | 0.019                                     |

**Table S30:** Natural bond orbitals analysis for **ATTD5** with its representative values

| Donor( <i>i</i> ) | Type     | Acceptor( <i>j</i> ) | Type       | <i>E</i> (2)<br>[kcal/mol] | <i>E</i> ( <i>j</i> )- <i>E</i> ( <i>i</i> )<br>[a.u.] | <i>F</i> ( <i>i,j</i> )<br>[a.u.] |
|-------------------|----------|----------------------|------------|----------------------------|--------------------------------------------------------|-----------------------------------|
| C27-C28           | $\pi$    | C33-C34              | $\pi^*$    | 35.22                      | 0.3                                                    | 0.093                             |
| C33-C34           | $\pi$    | C36-C37              | $\pi^*$    | 27.35                      | 0.29                                                   | 0.08                              |
| C85-C87           | $\pi$    | C80-C82              | $\pi^*$    | 25.89                      | 0.3                                                    | 0.079                             |
| C96-C98           | $\pi$    | C91-C93              | $\pi^*$    | 24.45                      | 0.3                                                    | 0.078                             |
| C29-C32           | $\pi$    | C27-C28              | $\pi^*$    | 23.12                      | 0.31                                                   | 0.08                              |
| C80-C82           | $\pi$    | C81-C83              | $\pi^*$    | 22.85                      | 0.3                                                    | 0.074                             |
| C92-C94           | $\pi$    | C96-C98              | $\pi^*$    | 22.72                      | 0.29                                                   | 0.075                             |
| C101-C102         | $\pi$    | C103-C106            | $\pi^*$    | 22.61                      | 0.31                                                   | 0.074                             |
| C103-C106         | $\pi$    | C104-C108            | $\pi^*$    | 22.29                      | 0.3                                                    | 0.075                             |
| C81-C83           | $\pi$    | C85-C87              | $\pi^*$    | 21.72                      | 0.3                                                    | 0.074                             |
| C38-C39           | $\pi$    | C123-C125            | $\pi^*$    | 19.41                      | 0.31                                                   | 0.071                             |
| C64-C66           | $\pi$    | C23-C31              | $\pi^*$    | 18.23                      | 0.32                                                   | 0.074                             |
| C23-C31           | $\pi$    | C24-C25              | $\pi^*$    | 17.07                      | 0.29                                                   | 0.067                             |
| C36-C37           | $\pi$    | C40-C41              | $\pi^*$    | 9.09                       | 0.31                                                   | 0.049                             |
| C42-O47           | $\pi$    | C40-C41              | $\pi^*$    | 4.28                       | 0.41                                                   | 0.041                             |
| C101-C102         | $\pi$    | C91-C93              | $\pi^*$    | 0.84                       | 0.3                                                    | 0.014                             |
| C45-N46           | $\pi$    | C43-N44              | $\pi^*$    | 0.78                       | 0.48                                                   | 0.017                             |
| C33-H35           | $\sigma$ | C27-S30              | $\sigma^*$ | 10.72                      | 0.72                                                   | 0.078                             |
| C37-C43           | $\sigma$ | C43-N44              | $\sigma^*$ | 8.41                       | 1.61                                                   | 0.104                             |
| C20-C25           | $\sigma$ | C24-C25              | $\sigma^*$ | 7.76                       | 1.33                                                   | 0.091                             |
| C29-C32           | $\sigma$ | C15-C32              | $\sigma^*$ | 6.83                       | 1.3                                                    | 0.084                             |
| C123-C125         | $\sigma$ | C125-C126            | $\sigma^*$ | 6.19                       | 1.27                                                   | 0.079                             |
| C3-C4             | $\sigma$ | C2-C3                | $\sigma^*$ | 5.77                       | 1.27                                                   | 0.076                             |
| C2-C22            | $\sigma$ | C13-C14              | $\sigma^*$ | 5.53                       | 1.19                                                   | 0.073                             |
| C1-C6             | $\sigma$ | C5-C6                | $\sigma^*$ | 5.51                       | 1.27                                                   | 0.075                             |
| C4-H8             | $\sigma$ | C5-C6                | $\sigma^*$ | 5.15                       | 1.08                                                   | 0.067                             |
| C5-C6             | $\sigma$ | C1-C6                | $\sigma^*$ | 5.04                       | 1.25                                                   | 0.071                             |
| C93-H97           | $\sigma$ | C91-C92              | $\sigma^*$ | 4.84                       | 1.1                                                    | 0.065                             |
| C91-C92           | $\sigma$ | C91-C93              | $\sigma^*$ | 4.76                       | 1.3                                                    | 0.07                              |
| C93-C96           | $\sigma$ | N90-C91              | $\sigma^*$ | 4.63                       | 1.13                                                   | 0.065                             |
| C94-C98           | $\sigma$ | C96-C98              | $\sigma^*$ | 4.8                        | 1.28                                                   | 0.07                              |
| C103-C106         | $\sigma$ | N90-C101             | $\sigma^*$ | 4.5                        | 1.14                                                   | 0.064                             |
| O111-C113         | $\sigma$ | C106-C108            | $\sigma^*$ | 3.08                       | 1.42                                                   | 0.059                             |
| N90-C91           | $\sigma$ | C87-N90              | $\sigma^*$ | 2.58                       | 1.21                                                   | 0.05                              |
| C21-C60           | $\sigma$ | C60-H63              | $\sigma^*$ | 0.61                       | 1.01                                                   | 0.022                             |
| C117-H120         | $\sigma$ | C98-O112             | $\sigma^*$ | 0.54                       | 0.91                                                   | 0.02                              |
| C45-N46           | $\sigma$ | C36-C37              | $\sigma^*$ | 0.5                        | 1.64                                                   | 0.026                             |
| O112              | LP(2)    | C96-C98              | $\pi^*$    | 32.51                      | 0.36                                                   | 0.103                             |
| S17               | LP(2)    | C11-C20              | $\pi^*$    | 23.61                      | 0.28                                                   | 0.073                             |
| F134              | LP(2)    | C123-C125            | $\pi^*$    | 0.52                       | 0.48                                                   | 0.015                             |
| O47               | LP(2)    | C41-C42              | $\sigma^*$ | 22.37                      | 0.74                                                   | 0.117                             |
| O47               | LP(1)    | S30-C32              | $\sigma^*$ | 1.21                       | 0.93                                                   | 0.03                              |
| F130              | LP(2)    | C125-C126            | $\sigma^*$ | 0.51                       | 1                                                      | 0.02                              |

**Table S31:** Natural bond orbitals analysis for ATTD6 with its representative values.

| Donor( <i>i</i> ) | Type     | Acceptor( <i>j</i> ) | Type       | <i>E</i> (2)<br>[kcal/mol] | <i>E</i> ( <i>j</i> )- <i>E</i> ( <i>i</i> )<br>[a.u] | <i>F</i> ( <i>i,j</i> )<br>[a.u] |
|-------------------|----------|----------------------|------------|----------------------------|-------------------------------------------------------|----------------------------------|
| C27-C28           | $\pi$    | C33-C34              | $\pi^*$    | 36.16                      | 0.3                                                   | 0.093                            |
| C33-C34           | $\pi$    | C36-C37              | $\pi^*$    | 28.25                      | 0.29                                                  | 0.081                            |
| C33-C34           | $\pi$    | C42-O47              | $\pi^*$    | 26.76                      | 0.3                                                   | 0.081                            |
| C104-C108         | $\pi$    | C101-C102            | $\pi^*$    | 24.11                      | 0.3                                                   | 0.077                            |
| C91-C93           | $\pi$    | C92-C94              | $\pi^*$    | 22.59                      | 0.31                                                  | 0.074                            |
| C81-C83           | $\pi$    | C85-C87              | $\pi^*$    | 21.69                      | 0.3                                                   | 0.074                            |
| C40-C41           | $\pi$    | C42-O47              | $\pi^*$    | 19.97                      | 0.33                                                  | 0.073                            |
| C85-C87           | $\pi$    | C81-C83              | $\pi^*$    | 18.89                      | 0.3                                                   | 0.068                            |
| C24-C25           | $\pi$    | C11-C20              | $\pi^*$    | 14.33                      | 0.32                                                  | 0.063                            |
| C29-C32           | $\pi$    | C14-C15              | $\pi^*$    | 12.97                      | 0.31                                                  | 0.058                            |
| C23-C31           | $\pi$    | C80-C82              | $\pi^*$    | 10.12                      | 0.32                                                  | 0.053                            |
| C36-C37           | $\pi$    | C40-C41              | $\pi^*$    | 9.14                       | 0.31                                                  | 0.049                            |
| C36-C37           | $\pi$    | C33-C34              | $\pi^*$    | 7.75                       | 0.33                                                  | 0.047                            |
| C42-O47           | $\pi$    | C40-C41              | $\pi^*$    | 4.3                        | 0.41                                                  | 0.041                            |
| C36-C37           | $\pi$    | C43-N44              | $\pi^*$    | 1.19                       | 0.41                                                  | 0.021                            |
| C43-N44           | $\pi$    | C45-N46              | $\pi^*$    | 0.82                       | 0.47                                                  | 0.018                            |
| C101-C102         | $\pi$    | C91-C93              | $\pi^*$    | 0.77                       | 0.3                                                   | 0.014                            |
| C33-H35           | $\sigma$ | C27-S30              | $\sigma^*$ | 10.74                      | 0.72                                                  | 0.079                            |
| C25-S26           | $\sigma$ | C24-S78              | $\sigma^*$ | 9.2                        | 0.86                                                  | 0.079                            |
| S30-C32           | $\sigma$ | C29-S79              | $\sigma^*$ | 8.63                       | 0.86                                                  | 0.077                            |
| C24-C25           | $\sigma$ | C20-C25              | $\sigma^*$ | 7.68                       | 1.29                                                  | 0.089                            |
| C27-C33           | $\sigma$ | C33-C34              | $\sigma^*$ | 6.85                       | 1.34                                                  | 0.085                            |
| C23-C24           | $\sigma$ | C20-C25              | $\sigma^*$ | 6.07                       | 1.21                                                  | 0.077                            |
| C34-C42           | $\sigma$ | C41-S127             | $\sigma^*$ | 5.91                       | 0.88                                                  | 0.065                            |
| C67-C69           | $\sigma$ | C27-C28              | $\sigma^*$ | 5.71                       | 1.29                                                  | 0.077                            |
| C121-H122         | $\sigma$ | C38-C39              | $\sigma^*$ | 4.99                       | 1.06                                                  | 0.065                            |
| C102-H105         | $\sigma$ | C101-C103            | $\sigma^*$ | 4.81                       | 1.1                                                   | 0.065                            |
| C28-C67           | $\sigma$ | C67-C69              | $\sigma^*$ | 4.22                       | 1.3                                                   | 0.066                            |
| C36-C40           | $\sigma$ | C33-C34              | $\sigma^*$ | 3.97                       | 1.28                                                  | 0.064                            |
| C52-H53           | $\sigma$ | C13-C22              | $\sigma^*$ | 3.73                       | 0.95                                                  | 0.053                            |
| C24-S78           | $\sigma$ | C66-C74              | $\sigma^*$ | 2.98                       | 1.12                                                  | 0.052                            |
| C96-C98           | $\sigma$ | C94-H99              | $\sigma^*$ | 1.99                       | 1.14                                                  | 0.043                            |
| N90-C91           | $\sigma$ | C93-C96              | $\sigma^*$ | 1.49                       | 1.36                                                  | 0.04                             |
| S18-C19           | $\sigma$ | C13-C19              | $\sigma^*$ | 1.02                       | 1.28                                                  | 0.032                            |
| C23-C24           | $\sigma$ | C25-S26              | $\sigma^*$ | 0.56                       | 0.88                                                  | 0.02                             |
| S17-C20           | $\sigma$ | C10-C21              | $\sigma^*$ | 0.51                       | 1.11                                                  | 0.021                            |
| C45-N46           | $\sigma$ | C36-C37              | $\sigma^*$ | 0.5                        | 1.64                                                  | 0.026                            |
| O112              | LP(2)    | C96-C98              | $\pi^*$    | 32.44                      | 0.36                                                  | 0.103                            |
| S79               | LP(2)    | C67-C69              | $\pi^*$    | 24.62                      | 0.29                                                  | 0.076                            |
| S30               | LP(2)    | C33-C34              | $\pi^*$    | 0.53                       | 0.28                                                  | 0.011                            |
| O131              | LP(1)    | S128-O129            | $\sigma^*$ | 2.68                       | 1.02                                                  | 0.048                            |
| O129              | LP(1)    | S128-O130            | $\sigma^*$ | 1.61                       | 1.17                                                  | 0.04                             |
| O136              | LP(2)    | C123-C125            | $\sigma^*$ | 0.5                        | 0.97                                                  | 0.02                             |

**Table S32:** Natural bond orbitals analysis for ATTD7 with its representative values.

| Donor( <i>i</i> ) | Type     | Acceptor( <i>j</i> ) | Type       | <i>E</i> (2)<br>[kcal/mol] | <i>E</i> ( <i>j</i> )- <i>E</i> ( <i>i</i> )<br>[a.u.] | <i>F</i> ( <i>i</i> , <i>j</i> )<br>[a.u.] |
|-------------------|----------|----------------------|------------|----------------------------|--------------------------------------------------------|--------------------------------------------|
| C27-C28           | $\pi$    | C33-C34              | $\pi^*$    | 35.93                      | 0.3                                                    | 0.093                                      |
| C33-C34           | $\pi$    | C36-C37              | $\pi^*$    | 27.92                      | 0.29                                                   | 0.081                                      |
| C33-C34           | $\pi$    | C42-O47              | $\pi^*$    | 26.79                      | 0.3                                                    | 0.081                                      |
| C39-C123          | $\pi$    | C125-C126            | $\pi^*$    | 24.52                      | 0.27                                                   | 0.075                                      |
| C29-C32           | $\pi$    | C27-C28              | $\pi^*$    | 23.38                      | 0.31                                                   | 0.081                                      |
| C92-C94           | $\pi$    | C96-C98              | $\pi^*$    | 22.6                       | 0.29                                                   | 0.075                                      |
| C3-C4             | $\pi$    | C1-C2                | $\pi^*$    | 21.08                      | 0.3                                                    | 0.073                                      |
| C92-C94           | $\pi$    | C91-C93              | $\pi^*$    | 19.33                      | 0.3                                                    | 0.07                                       |
| C23-C31           | $\pi$    | C80-C81              | $\pi^*$    | 10.39                      | 0.32                                                   | 0.054                                      |
| C36-C37           | $\pi$    | C40-C41              | $\pi^*$    | 9.03                       | 0.31                                                   | 0.049                                      |
| C36-C37           | $\pi$    | C33-C34              | $\pi^*$    | 7.77                       | 0.33                                                   | 0.047                                      |
| C42-O47           | $\pi$    | C40-C41              | $\pi^*$    | 4.32                       | 0.41                                                   | 0.041                                      |
| C42-O47           | $\pi$    | C33-C34              | $\pi^*$    | 3.47                       | 0.43                                                   | 0.038                                      |
| C36-C37           | $\pi$    | C43-N44              | $\pi^*$    | 1.09                       | 0.41                                                   | 0.02                                       |
| C67-C69           | $\pi$    | C67-C69              | $\pi^*$    | 0.91                       | 0.32                                                   | 0.016                                      |
| C43-N44           | $\pi$    | C45-N46              | $\pi^*$    | 0.82                       | 0.47                                                   | 0.018                                      |
| C45-N46           | $\pi$    | C43-N44              | $\pi^*$    | 0.76                       | 0.47                                                   | 0.017                                      |
| C33-H35           | $\sigma$ | C27-S30              | $\sigma^*$ | 10.72                      | 0.72                                                   | 0.078                                      |
| C25-S26           | $\sigma$ | C24-S78              | $\sigma^*$ | 9.2                        | 0.86                                                   | 0.079                                      |
| C126-C130         | $\sigma$ | C130-N131            | $\sigma^*$ | 8.93                       | 1.62                                                   | 0.108                                      |
| C2-C3             | $\sigma$ | S18-C19              | $\sigma^*$ | 7.87                       | 0.89                                                   | 0.075                                      |
| C15-C32           | $\sigma$ | C29-C32              | $\sigma^*$ | 6.9                        | 1.32                                                   | 0.085                                      |
| C38-C39           | $\sigma$ | C36-C40              | $\sigma^*$ | 6.39                       | 1.18                                                   | 0.078                                      |
| C36-C37           | $\sigma$ | C37-C45              | $\sigma^*$ | 6.01                       | 1.27                                                   | 0.078                                      |
| S30-C32           | $\sigma$ | C15-S18              | $\sigma^*$ | 5.72                       | 0.85                                                   | 0.062                                      |
| C9-C10            | $\sigma$ | C1-C6                | $\sigma^*$ | 5.08                       | 1.29                                                   | 0.072                                      |
| C66-S78           | $\sigma$ | C24-C25              | $\sigma^*$ | 4.97                       | 1.24                                                   | 0.07                                       |
| S17-C20           | $\sigma$ | C11-H12              | $\sigma^*$ | 3.89                       | 1.06                                                   | 0.058                                      |
| C85-C87           | $\sigma$ | N90-C91              | $\sigma^*$ | 3.56                       | 1.13                                                   | 0.057                                      |
| C29-S79           | $\sigma$ | S30-C32              | $\sigma^*$ | 3.08                       | 0.89                                                   | 0.047                                      |
| C125-C128         | $\sigma$ | C39-C123             | $\sigma^*$ | 2.99                       | 1.3                                                    | 0.056                                      |
| C5-C21            | $\sigma$ | C3-C4                | $\sigma^*$ | 2.06                       | 1.19                                                   | 0.044                                      |
| C10-C21           | $\sigma$ | C21-C60              | $\sigma^*$ | 1.73                       | 1.01                                                   | 0.038                                      |
| C102-H105         | $\sigma$ | N90-C101             | $\sigma^*$ | 1.01                       | 0.94                                                   | 0.028                                      |
| C66-S78           | $\sigma$ | C23-C24              | $\sigma^*$ | 0.58                       | 1.17                                                   | 0.023                                      |
| C117-H120         | $\sigma$ | C98-O112             | $\sigma^*$ | 0.54                       | 0.91                                                   | 0.02                                       |
| C69-S79           | $\sigma$ | C28-C29              | $\sigma^*$ | 0.51                       | 1.2                                                    | 0.022                                      |
| N90               | LP(1)    | C83-C87              | $\pi^*$    | 32.73                      | 0.29                                                   | 0.091                                      |
| S127              | LP(2)    | C38-C121             | $\pi^*$    | 23.85                      | 0.27                                                   | 0.072                                      |
| S30               | LP(2)    | C33-C34              | $\pi^*$    | 0.53                       | 0.28                                                   | 0.011                                      |
| O47               | LP(2)    | C41-C42              | $\sigma^*$ | 22.62                      | 0.74                                                   | 0.117                                      |
| N90               | LP(1)    | C91-C93              | $\sigma^*$ | 3.88                       | 0.85                                                   | 0.055                                      |

---

|     |       |         |            |      |      |       |
|-----|-------|---------|------------|------|------|-------|
| S30 | LP(1) | C27-C33 | $\sigma^*$ | 0.51 | 1.24 | 0.022 |
|-----|-------|---------|------------|------|------|-------|

**Table S33:** Natural bond orbitals analysis for ATTD8 with its representative values.

| Donor( <i>i</i> ) | Type     | Acceptor( <i>j</i> ) | Type       | <i>E</i> (2)<br>[kcal/mol] | <i>E</i> ( <i>j</i> )- <i>E</i> ( <i>i</i> )<br>[a.u.] | <i>F</i> ( <i>i</i> , <i>j</i> )<br>[a.u.] |
|-------------------|----------|----------------------|------------|----------------------------|--------------------------------------------------------|--------------------------------------------|
| C27-C28           | $\pi$    | C33-C34              | $\pi^*$    | 34.19                      | 0.3                                                    | 0.092                                      |
| C33-C34           | $\pi$    | C36-C37              | $\pi^*$    | 26.56                      | 0.29                                                   | 0.079                                      |
| C83-C87           | $\pi$    | C80-C81              | $\pi^*$    | 25.51                      | 0.3                                                    | 0.079                                      |
| C125-C126         | $\pi$    | C38-C121             | $\pi^*$    | 24.92                      | 0.28                                                   | 0.074                                      |
| C5-C6             | $\pi$    | C3-C4                | $\pi^*$    | 23.89                      | 0.29                                                   | 0.074                                      |
| C1-C2             | $\pi$    | C5-C6                | $\pi^*$    | 22.77                      | 0.3                                                    | 0.076                                      |
| C80-C81           | $\pi$    | C83-C87              | $\pi^*$    | 21.04                      | 0.29                                                   | 0.07                                       |
| C13-C19           | $\pi$    | C14-C15              | $\pi^*$    | 20.6                       | 0.29                                                   | 0.072                                      |
| C1-C2             | $\pi$    | C3-C4                | $\pi^*$    | 19.34                      | 0.3                                                    | 0.07                                       |
| C96-C98           | $\pi$    | C92-C94              | $\pi^*$    | 18.63                      | 0.31                                                   | 0.068                                      |
| C23-C31           | $\pi$    | C24-C25              | $\pi^*$    | 17.04                      | 0.29                                                   | 0.067                                      |
| C40-C41           | $\pi$    | C39-C123             | $\pi^*$    | 16.6                       | 0.33                                                   | 0.069                                      |
| C24-C25           | $\pi$    | C23-C31              | $\pi^*$    | 15.34                      | 0.33                                                   | 0.067                                      |
| C36-C37           | $\pi$    | C33-C34              | $\pi^*$    | 7.82                       | 0.33                                                   | 0.047                                      |
| C131-O132         | $\pi$    | C125-C126            | $\pi^*$    | 1.32                       | 0.44                                                   | 0.024                                      |
| C36-C37           | $\pi$    | C43-N44              | $\pi^*$    | 0.98                       | 0.41                                                   | 0.019                                      |
| C101-C102         | $\pi$    | C91-C93              | $\pi^*$    | 0.72                       | 0.3                                                    | 0.013                                      |
| C33-H35           | $\sigma$ | C27-S30              | $\sigma^*$ | 10.61                      | 0.72                                                   | 0.078                                      |
| C25-S26           | $\sigma$ | C24-S78              | $\sigma^*$ | 9.2                        | 0.86                                                   | 0.079                                      |
| S30-C32           | $\sigma$ | C29-S79              | $\sigma^*$ | 8.73                       | 0.86                                                   | 0.077                                      |
| C2-C3             | $\sigma$ | S18-C19              | $\sigma^*$ | 7.84                       | 0.9                                                    | 0.075                                      |
| C15-C32           | $\sigma$ | C29-C32              | $\sigma^*$ | 6.91                       | 1.32                                                   | 0.085                                      |
| C27-S30           | $\sigma$ | C28-C67              | $\sigma^*$ | 5.73                       | 1.2                                                    | 0.074                                      |
| C64-C66           | $\sigma$ | C23-C31              | $\sigma^*$ | 5.19                       | 1.35                                                   | 0.075                                      |
| C121-H122         | $\sigma$ | C38-C39              | $\sigma^*$ | 4.98                       | 1.05                                                   | 0.065                                      |
| C93-H97           | $\sigma$ | C91-C92              | $\sigma^*$ | 4.81                       | 1.1                                                    | 0.065                                      |
| C37-C43           | $\sigma$ | C34-C36              | $\sigma^*$ | 3.95                       | 1.24                                                   | 0.063                                      |
| C9-C10            | $\sigma$ | C11-H12              | $\sigma^*$ | 3.69                       | 1.11                                                   | 0.057                                      |
| C80-C82           | $\sigma$ | S26-C31              | $\sigma^*$ | 3.34                       | 0.91                                                   | 0.049                                      |
| C38-C121          | $\sigma$ | C126-C131            | $\sigma^*$ | 2.98                       | 1.18                                                   | 0.054                                      |
| C80-C82           | $\sigma$ | C85-H89              | $\sigma^*$ | 2.33                       | 1.12                                                   | 0.046                                      |
| C96-C98           | $\sigma$ | C94-H99              | $\sigma^*$ | 2.01                       | 1.14                                                   | 0.043                                      |
| C20-C25           | $\sigma$ | C23-C24              | $\sigma^*$ | 1.77                       | 1.25                                                   | 0.042                                      |
| C36-C40           | $\sigma$ | C38-C39              | $\sigma^*$ | 1.01                       | 1.2                                                    | 0.031                                      |
| C23-C24           | $\sigma$ | C25-S26              | $\sigma^*$ | 0.56                       | 0.88                                                   | 0.02                                       |
| C117-H120         | $\sigma$ | C98-O112             | $\sigma^*$ | 0.54                       | 0.91                                                   | 0.02                                       |
| C123-H124         | $\sigma$ | C125-C128            | $\sigma^*$ | 0.5                        | 0.96                                                   | 0.02                                       |
| O130              | LP(2)    | C128-O129            | $\pi^*$    | 50.66                      | 0.37                                                   | 0.124                                      |
| S17               | LP(2)    | C9-C10               | $\pi^*$    | 23.76                      | 0.29                                                   | 0.075                                      |
| S30               | LP(2)    | C33-C34              | $\pi^*$    | 0.5                        | 0.28                                                   | 0.011                                      |
| O132              | LP(2)    | C131-O133            | $\sigma^*$ | 33.13                      | 0.68                                                   | 0.135                                      |
| O133              | LP(2)    | C138-H139            | $\sigma^*$ | 5.28                       | 0.71                                                   | 0.058                                      |

|     |       |         |            |      |      |       |
|-----|-------|---------|------------|------|------|-------|
| S79 | LP(1) | S18-C19 | $\sigma^*$ | 0.51 | 0.89 | 0.019 |
|-----|-------|---------|------------|------|------|-------|

**Table S34:** Dipole moment ( $u$ ) and major contributing tensors ( $D$ ) of the studied compounds.

| <b>Compounds</b> | $u_x$ | $u_y$ | $u_z$ | $u_{total}$ |
|------------------|-------|-------|-------|-------------|
|------------------|-------|-------|-------|-------------|

|              |          |         |         |       |
|--------------|----------|---------|---------|-------|
| <b>ATTR1</b> | -0.0005  | -0.0001 | 0.4618  | 0.46  |
| <b>ATTD2</b> | -18.1919 | 1.1142  | 2.3406  | 18.38 |
| <b>ATTD3</b> | 27.2462  | 0.6546  | 0.7476  | 27.26 |
| <b>ATTD4</b> | 19.2814  | -1.3926 | 0.2677  | 19.33 |
| <b>ATTD5</b> | 22.8245  | -0.2264 | 0.2871  | 22.83 |
| <b>ATTD6</b> | -24.6976 | 0.6917  | 1.9786  | 24.79 |
| <b>ATTD7</b> | -28.0619 | 1.3336  | -1.5738 | 28.14 |
| <b>ATTD8</b> | -16.4007 | 1.2622  | -1.2087 | 16.49 |

**Table S35:** Linear polarizabilities and major contributing tensors (*esu*) of the compounds (**ATTR1** and **ATTD2-ATTD8**).

| <b>Compounds</b> | $\alpha_{xx} \times 10^{-22}$ | $\alpha_{yy} \times 10^{-22}$ | $\alpha_{zz} \times 10^{-22}$ | $\langle\alpha\rangle \times 10^{-22}$ |
|------------------|-------------------------------|-------------------------------|-------------------------------|----------------------------------------|
| <b>ATTR1</b>     | 6.30                          | 2.19                          | 0.65                          | 3.05                                   |
| <b>ATTD2</b>     | 5.84                          | 2.21                          | 0.87                          | 2.97                                   |
| <b>ATTD3</b>     | 6.24                          | 2.35                          | 0.99                          | 3.19                                   |
| <b>ATTD4</b>     | 5.98                          | 2.37                          | 0.91                          | 3.09                                   |
| <b>ATTD5</b>     | 6.05                          | 2.36                          | 0.92                          | 3.11                                   |
| <b>ATTD6</b>     | 6.23                          | 2.39                          | 1.02                          | 3.21                                   |
| <b>ATTD7</b>     | 6.30                          | 2.39                          | 0.92                          | 3.20                                   |
| <b>ATTD8</b>     | 5.98                          | 2.41                          | 0.99                          | 3.13                                   |

**Table S36:** The calculated first hyperpolarizability ( $\beta_{tot}$ ) along its major contributing tensors (*esu*) of **ATTR1** and **ATTD2-ATTD8**.

| <b>Systems</b>                | <b>ATTR1</b> | <b>ATTD2</b> | <b>ATTD3</b> | <b>ATTD4</b> | <b>ATTD5</b> | <b>ATTD6</b> | <b>ATTD7</b> | <b>ATTD8</b> |
|-------------------------------|--------------|--------------|--------------|--------------|--------------|--------------|--------------|--------------|
| $\beta_{xxx} \times 10^{-27}$ | -0.0001      | -6.97        | 8.06         | 5.98         | 6.70         | -7.45        | -7.74        | -5.86        |
| $\beta_{xxy} \times 10^{-28}$ | -0.0003      | 4.36         | -7.50        | -6.91        | -8.97        | -9.74        | -7.41        | -7.16        |
| $\beta_{xyy} \times 10^{-29}$ | 0.0003       | -0.69        | 12.4         | 1.10         | 8.80         | -12.0        | -7.24        | -3.83        |
| $\beta_{yyy} \times 10^{-30}$ | 0.001        | -9.90        | 29.8         | -16.4        | -3.27        | 5.04         | 15.9         | -8.46        |
| $\beta_{xxz} \times 10^{-29}$ | 5.00         | -1.36        | -17.0        | -5.74        | -15.8        | 14.5         | 6.51         | 13.6         |
| $\beta_{yyz} \times 10^{-30}$ | 3.60         | -4.25        | -11.3        | -4.92        | -1.47        | 9.83         | 5.61         | 3.97         |
| $\beta_{xzz} \times 10^{-30}$ | 0.001        | 4.31         | 6.97         | -3.37        | 2.56         | -4.96        | 2.92         | -9.69        |
| $\beta_{yzz} \times 10^{-31}$ | 0.003        | -1.84        | 8.08         | 3.41         | -5.90        | 2.95         | 4.71         | -0.099       |
| $\beta_{zzz} \times 10^{-30}$ | -0.31        | -1.40        | -1.07        | -1.15        | -1.30        | 0.614        | 1.12         | 0.956        |
| $\beta_{tot} \times 10^{-27}$ | 0.05         | 6.98         | 8.23         | 6.03         | 6.86         | 7.64         | 7.84         | 5.96         |

**Table S37:** Second hyper-polarizabilities and major contributing tensors (*esu*) of the studied compounds.

| <b>Compounds</b> | $\gamma_x \times 10^{-31}$ | $\gamma_y \times 10^{-33}$ | $\gamma_z \times 10^{-35}$ | $\langle\gamma\rangle \times 10^{-31}$ |
|------------------|----------------------------|----------------------------|----------------------------|----------------------------------------|
| <b>ATTR1</b>     | 0.72                       | 0.10                       | 0.43                       | 0.72                                   |
| <b>ATTD2</b>     | 1.28                       | 0.83                       | 0.96                       | 1.29                                   |
| <b>ATTD3</b>     | 1.63                       | 2.88                       | 12.7                       | 1.66                                   |
| <b>ATTD4</b>     | 1.08                       | 1.69                       | 0.98                       | 1.10                                   |
| <b>ATTD5</b>     | 1.21                       | 2.48                       | 6.69                       | 1.24                                   |
| <b>ATTD6</b>     | 1.42                       | 3.01                       | 9.51                       | 1.45                                   |
| <b>ATTD7</b>     | 1.47                       | 2.21                       | 1.10                       | 1.49                                   |
| <b>ATTD8</b>     | 1.06                       | 1.89                       | 10.2                       | 1.08                                   |

**Table S38:** The IUPAC names and abbreviations of investigated compounds



| Compound | IUPAC name                                                                                                                                                                                                                                                                                                                                         |
|----------|----------------------------------------------------------------------------------------------------------------------------------------------------------------------------------------------------------------------------------------------------------------------------------------------------------------------------------------------------|
| ATTD2    | (Z)-2-(2-((6-(7-(4-(4-(bis(4-methoxyphenyl)amino)phenyl)-2-methylthieno[3,4-b]thiophen-6-yl)-4,4,9,9-tetramethyl-4,9-dihydro-s-indaceno[1,2-b:5,6-b']dithiophen-2-yl)-2-methylthieno[3,4-b]thiophen-4-yl)methylene)-3-oxo-2,3-dihydro-1 <i>H</i> -inden-1-ylidene)malononitrile                                                                    |
| ATTD3    | (Z)-2-(2-((6-(7-(4-(4-(bis(4-methoxyphenyl)amino)phenyl)-2-methylthieno[3,4-b]thiophen-6-yl)-4,4,9,9-tetramethyl-4,9-dihydro-s-indaceno[1,2-b:5,6-b']dithiophen-2-yl)-2-methylthieno[3,4-b]thiophen-4-yl)methylene)-6,7-dinitro-3-oxo-2,3-dihydro-1 <i>H</i> -benzo[ <i>b</i> ]cyclopenta[ <i>d</i> ]thiophen-1-ylidene)malononitrile              |
| ATTD4    | (Z)-2-(2-((6-(7-(4-(4-(bis(4-methoxyphenyl)amino)phenyl)-2-methylthieno[3,4-b]thiophen-6-yl)-4,4,9,9-tetramethyl-4,9-dihydro-s-indaceno[1,2-b:5,6-b']dithiophen-2-yl)-2-methylthieno[3,4-b]thiophen-4-yl)methylene)-6,7-dichloro-3-oxo-2,3-dihydro-1 <i>H</i> -benzo[ <i>b</i> ]cyclopenta[ <i>d</i> ]thiophen-1-ylidene)malononitrile             |
| ATTD5    | (Z)-2-(2-((6-(7-(4-(4-(bis(4-methoxyphenyl)amino)phenyl)-2-methylthieno[3,4-b]thiophen-6-yl)-4,4,9,9-tetramethyl-4,9-dihydro-s-indaceno[1,2-b:5,6-b']dithiophen-2-yl)-2-methylthieno[3,4-b]thiophen-4-yl)methylene)-3-oxo-6,7-bis(trifluoromethyl)-2,3-dihydro-1 <i>H</i> -benzo[ <i>b</i> ]cyclopenta[ <i>d</i> ]thiophen-1-ylidene)malononitrile |
| ATTD6    | (Z)-2-((6-(7-(4-(4-(bis(4-methoxyphenyl)amino)phenyl)-2-methylthieno[3,4-b]thiophen-6-yl)-4,4,9,9-tetramethyl-4,9-dihydro-s-indaceno[1,2-b:5,6-b']dithiophen-2-yl)-2-methylthieno[3,4-b]thiophen-4-yl)methylene)-1-(dicyanomethylene)-3-oxo-2,3-dihydro-1 <i>H</i> -benzo[ <i>b</i> ]cyclopenta[ <i>d</i> ]thiophene-6,7-disulfonic acid           |
| ATTD7    | Z)-2-((6-(7-(4-(4-(bis(4-methoxyphenyl)amino)phenyl)-2-methylthieno[3,4-b]thiophen-6-yl)-4,4,9,9-tetramethyl-4,9-dihydro-s-indaceno[1,2-b:5,6-b']dithiophen-2-yl)-2-methylthieno[3,4-b]thiophen-4-yl)methylene)-1-(dicyanomethylene)-3-oxo-2,3-dihydro-1 <i>H</i> -benzo[ <i>b</i> ]cyclopenta[ <i>d</i> ]thiophene-6,7-dicarbonitrile             |
| ATTD8    | dimethyl(Z)-2-((6-(7-(4-(4-(bis(4-methoxyphenyl)amino)phenyl)-2-methylthieno[3,4-b]thiophen-6-yl)-4,4,9,9-tetramethyl-4,9-dihydro-s-indaceno[1,2-b:5,6-b']dithiophen-2-yl)-2-methylthieno[3,4-b]thiophen-4-yl)methylene)-1-(dicyanomethylene)-3-oxo-2,3-dihydro-1 <i>H</i> -benzo[ <i>b</i> ]cyclopenta[ <i>d</i> ]thiophene-6,7-dicarboxylate     |

**Table S39:** Representative values of NBOs study for the entitled compounds (ATTR1 and ATTD2-ATTD8).

| Compounds | Donor( <i>i</i> ) | Type     | Acceptor( <i>j</i> ) | Type       | <i>E</i> (2)<br>[kcal/mol] | <i>E</i> ( <i>j</i> )- <i>E</i> ( <i>i</i> )<br>[a.u.] | <i>F</i> ( <i>i,j</i> )<br>[a.u.] |
|-----------|-------------------|----------|----------------------|------------|----------------------------|--------------------------------------------------------|-----------------------------------|
| ATTR1     | C23-C31           | $\pi$    | C33-C54              | $\pi^*$    | 33.74                      | 0.3                                                    | 0.091                             |
|           | C67-N68           | $\pi$    | C69-N70              | $\pi^*$    | 0.78                       | 0.48                                                   | 0.017                             |
|           | C33-H53           | $\sigma$ | S26-C31              | $\sigma^*$ | 10.71                      | 0.72                                                   | 0.078                             |
|           | C67-N68           | $\sigma$ | C56-C57              | $\sigma^*$ | 0.5                        | 1.65                                                   | 0.026                             |
|           | S26               | LP(2)    | C24-C25              | $\pi^*$    | 28.61                      | 0.25                                                   | 0.078                             |

|              |              |          |           |            |         |       |       |
|--------------|--------------|----------|-----------|------------|---------|-------|-------|
|              | O52          | LP(2)    | C43-C47   | $\sigma^*$ | 20.79   | 0.76  | 0.114 |
| <b>ATTD2</b> | C27-C28      | $\pi$    | C33-C34   | $\pi^*$    | 34.84   | 0.3   | 0.092 |
|              | C107-C108    | $\pi$    | C97-C99   | $\pi^*$    | 0.76    | 0.3   | 0.014 |
|              | C33-H35      | $\sigma$ | C27-S30   | $\sigma^*$ | 10.85   | 0.72  | 0.079 |
|              | C73-S83      | $\sigma$ | C28-C29   | $\sigma^*$ | 0.51    | 1.2   | 0.022 |
|              | O118         | LP(2)    | C102-C104 | $\pi^*$    | 32.47   | 0.36  | 0.103 |
|              | O51          | LP(2)    | C42-C46   | $\sigma^*$ | 20.86   | 0.76  | 0.114 |
|              | <b>ATTD3</b> | C27-C28  | $\pi$     | C33-C34    | $\pi^*$ | 36.23 | 0.3   |
| C101-C102    |              | $\pi$    | C91-C93   | $\pi^*$    | 0.76    | 0.3   | 0.014 |
| C33-H35      |              | $\sigma$ | C27-S30   | $\sigma^*$ | 10.77   | 0.72  | 0.079 |
| C69-S79      |              | $\sigma$ | C28-C29   | $\sigma^*$ | 0.51    | 1.2   | 0.022 |
| O112         |              | LP(2)    | C96-C98   | $\pi^*$    | 32.44   | 0.36  | 0.103 |
| O47          |              | LP(2)    | C41-C42   | $\sigma^*$ | 22.65   | 0.74  | 0.117 |
| <b>ATTD4</b> |              | C27-C28  | $\pi$     | C33-C34    | $\pi^*$ | 34.1  | 0.3   |
|              | C45-N46      | $\pi$    | C43-N44   | $\pi^*$    | 0.77    | 0.48  | 0.017 |
|              | C33-H35      | $\sigma$ | C27-S30   | $\sigma^*$ | 10.58   | 0.72  | 0.078 |
|              | S17-C20      | $\sigma$ | C10-C21   | $\sigma^*$ | 0.51    | 1.11  | 0.021 |
|              | O111         | LP(2)    | C104-C108 | $\pi^*$    | 32.59   | 0.36  | 0.103 |
|              | O47          | LP(2)    | C41-C42   | $\sigma^*$ | 22.21   | 0.74  | 0.116 |
|              | <b>ATTD5</b> | C27-C28  | $\pi$     | C33-C34    | $\pi^*$ | 35.22 | 0.3   |
| C45-N46      |              | $\pi$    | C43-N44   | $\pi^*$    | 0.78    | 0.48  | 0.017 |
| C33-H35      |              | $\sigma$ | C27-S30   | $\sigma^*$ | 10.72   | 0.72  | 0.078 |
| C45-N46      |              | $\sigma$ | C36-C37   | $\sigma^*$ | 0.5     | 1.64  | 0.026 |
| O112         |              | LP(2)    | C96-C98   | $\pi^*$    | 32.51   | 0.36  | 0.103 |
| O47          |              | LP(2)    | C41-C42   | $\sigma^*$ | 22.37   | 0.74  | 0.117 |
| <b>ATTD6</b> |              | C27-C28  | $\pi$     | C33-C34    | $\pi^*$ | 36.16 | 0.3   |
|              | C101-C102    | $\pi$    | C91-C93   | $\pi^*$    | 0.77    | 0.3   | 0.014 |
|              | C33-H35      | $\sigma$ | C27-S30   | $\sigma^*$ | 10.74   | 0.72  | 0.079 |
|              | C45-N46      | $\sigma$ | C36-C37   | $\sigma^*$ | 0.5     | 1.64  | 0.026 |
|              | O112         | LP(2)    | C96-C98   | $\pi^*$    | 32.44   | 0.36  | 0.103 |
|              | O131         | LP(1)    | S128-O129 | $\sigma^*$ | 2.68    | 1.02  | 0.048 |
|              | <b>ATTD7</b> | C27-C28  | $\pi$     | C33-C34    | $\pi^*$ | 35.93 | 0.3   |
| C45-N46      |              | $\pi$    | C43-N44   | $\pi^*$    | 0.76    | 0.47  | 0.017 |
| C33-H35      |              | $\sigma$ | C27-S30   | $\sigma^*$ | 10.72   | 0.72  | 0.078 |
| C69-S79      |              | $\sigma$ | C28-C29   | $\sigma^*$ | 0.51    | 1.2   | 0.022 |
| N90          |              | LP(1)    | C83-C87   | $\pi^*$    | 32.73   | 0.29  | 0.091 |
| O47          |              | LP(2)    | C41-C42   | $\sigma^*$ | 22.62   | 0.74  | 0.117 |
| <b>ATTD8</b> |              | C27-C28  | $\pi$     | C33-C34    | $\pi^*$ | 34.19 | 0.3   |
|              | C101-C102    | $\pi$    | C91-C93   | $\pi^*$    | 0.72    | 0.3   | 0.013 |
|              | C33-H35      | $\sigma$ | C27-S30   | $\sigma^*$ | 10.61   | 0.72  | 0.078 |
|              | C123-H124    | $\sigma$ | 125-C128  | $\sigma^*$ | 0.5     | 0.96  | 0.02  |
|              | O130         | LP(2)    | C128-O129 | $\pi^*$    | 50.66   | 0.37  | 0.124 |
|              | O132         | LP(2)    | C131-O133 | $\sigma^*$ | 33.13   | 0.68  | 0.135 |

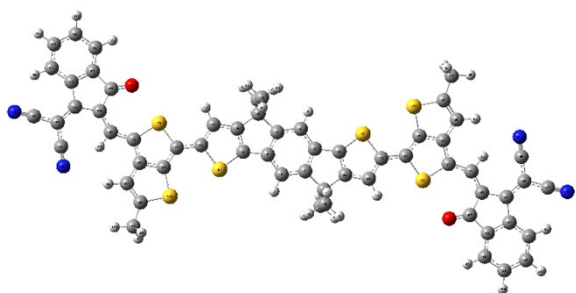

**ATTR1**

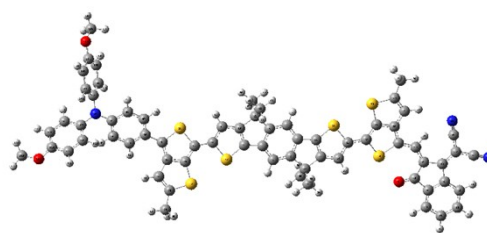

**ATTD2**

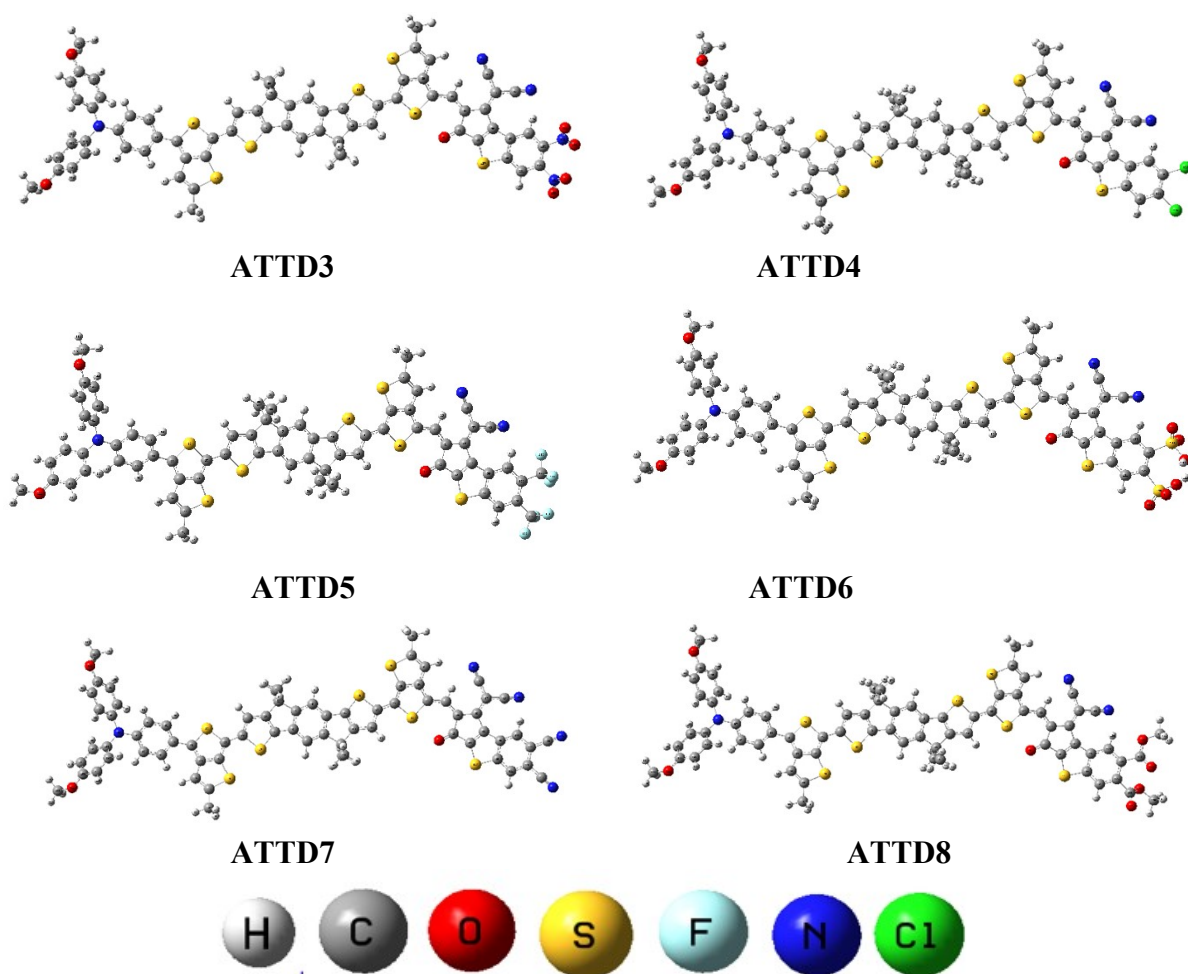

**Figure S1:** Optimized structures of reference compound (ATTR1) and designed derivatives (ATTD2-ATTD8).

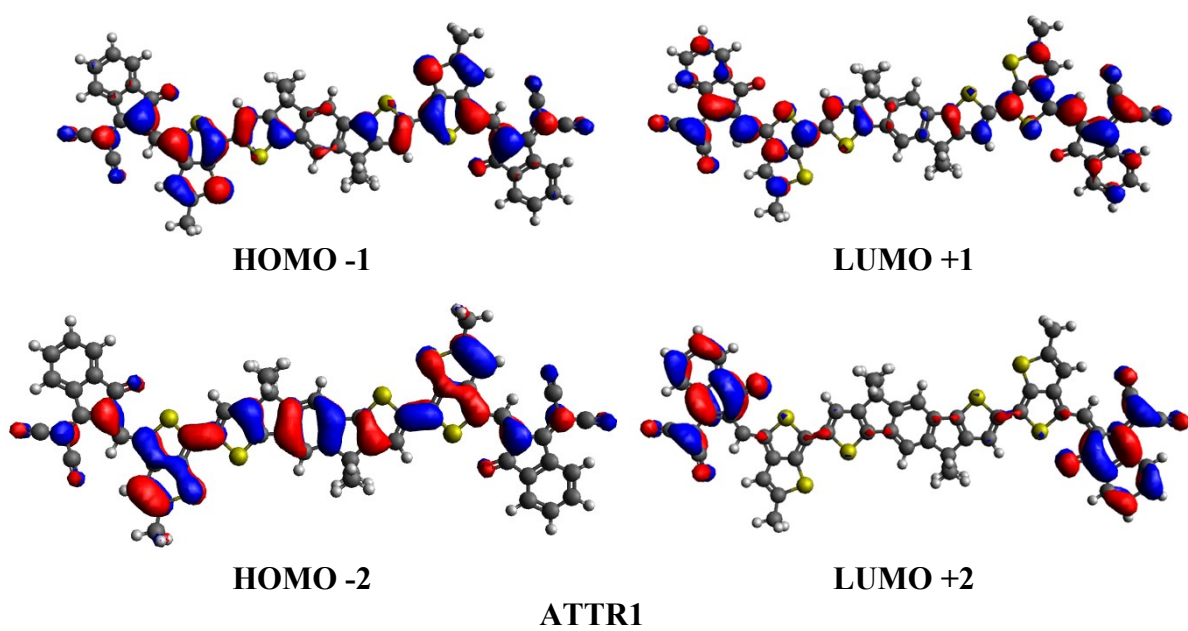

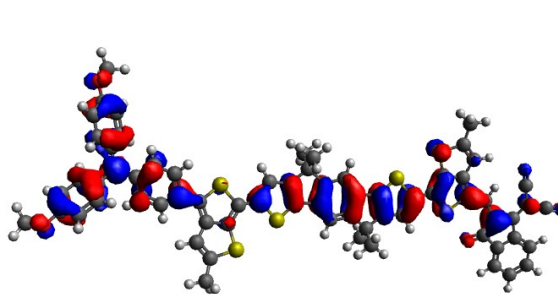

**HOMO -1**

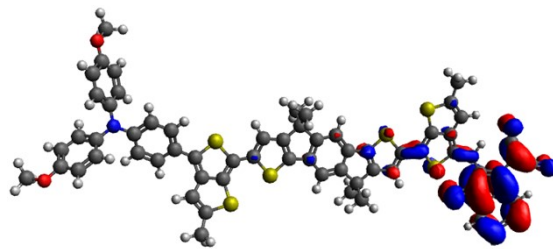

**LUMO +1**

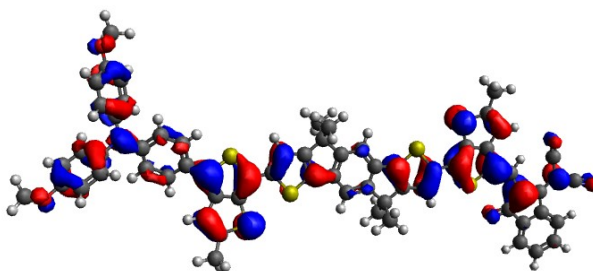

**HOMO -2**

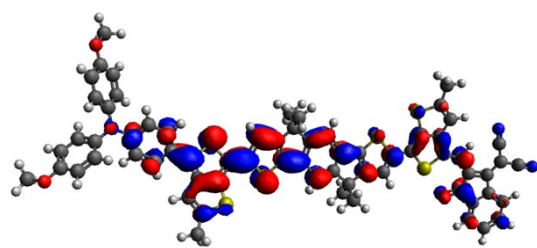

**LUMO +2**

**ATTD2**

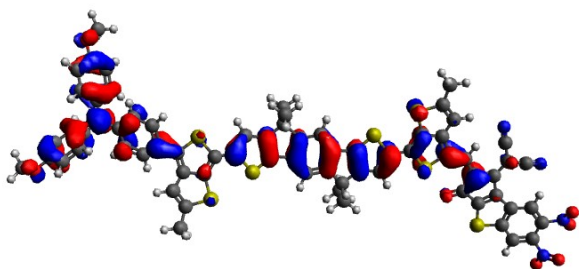

**HOMO -1**

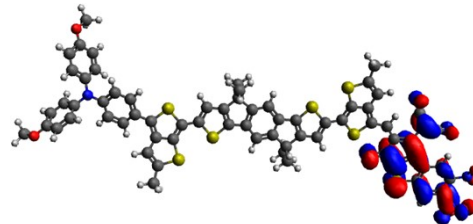

**LUMO +1**

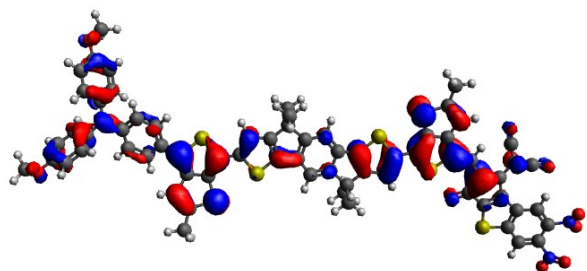

**HOMO -2**

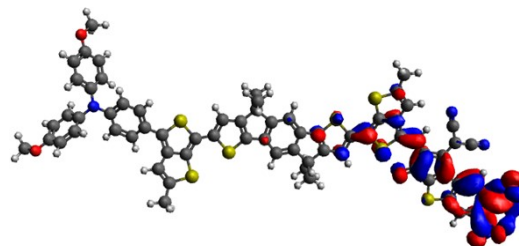

**LUMO +2**

**ATTD3**

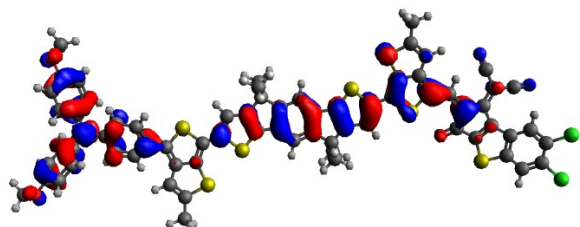

**HOMO -1**

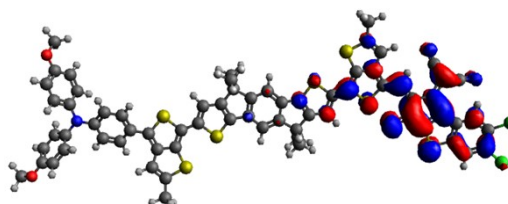

**LUMO +1**

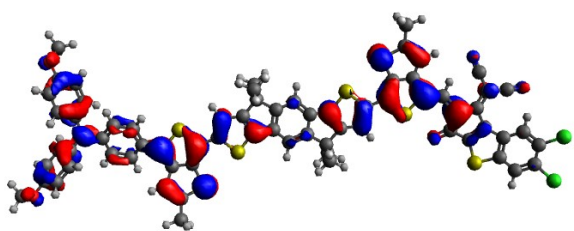

**HOMO -2**

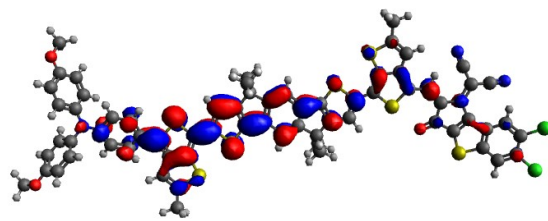

**LUMO +2**

**ATTD4**

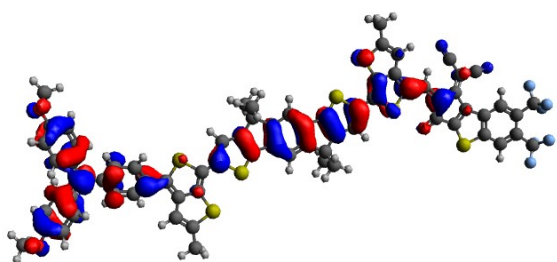

**HOMO -1**

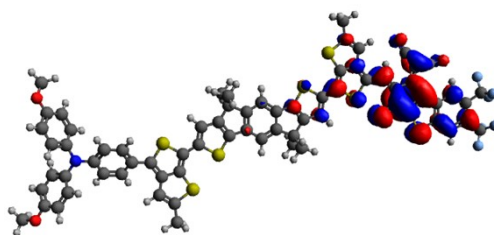

**LUMO +1**

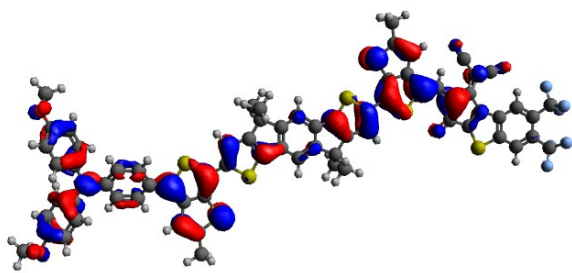

**HOMO -2**

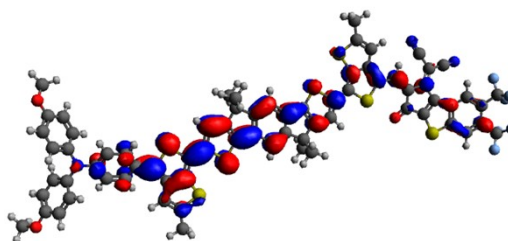

**LUMO +2**

**ATTD5**

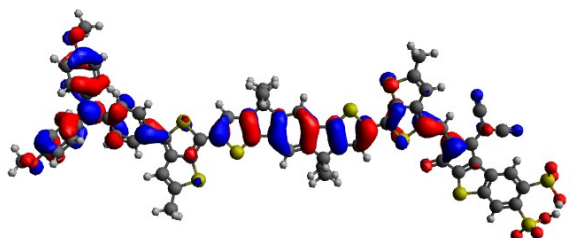

**HOMO -1**

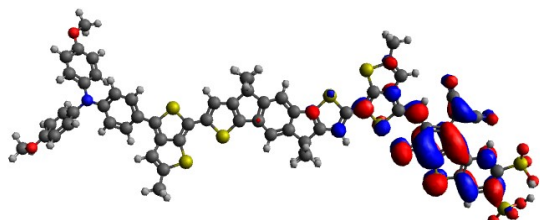

**LUMO +1**

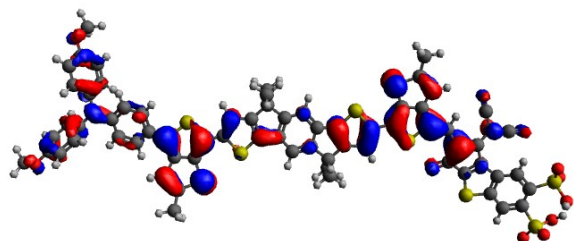

**HOMO -2**

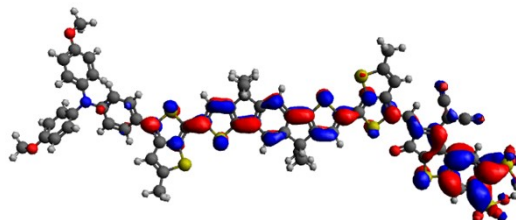

**LUMO +2**

**ATTD6**

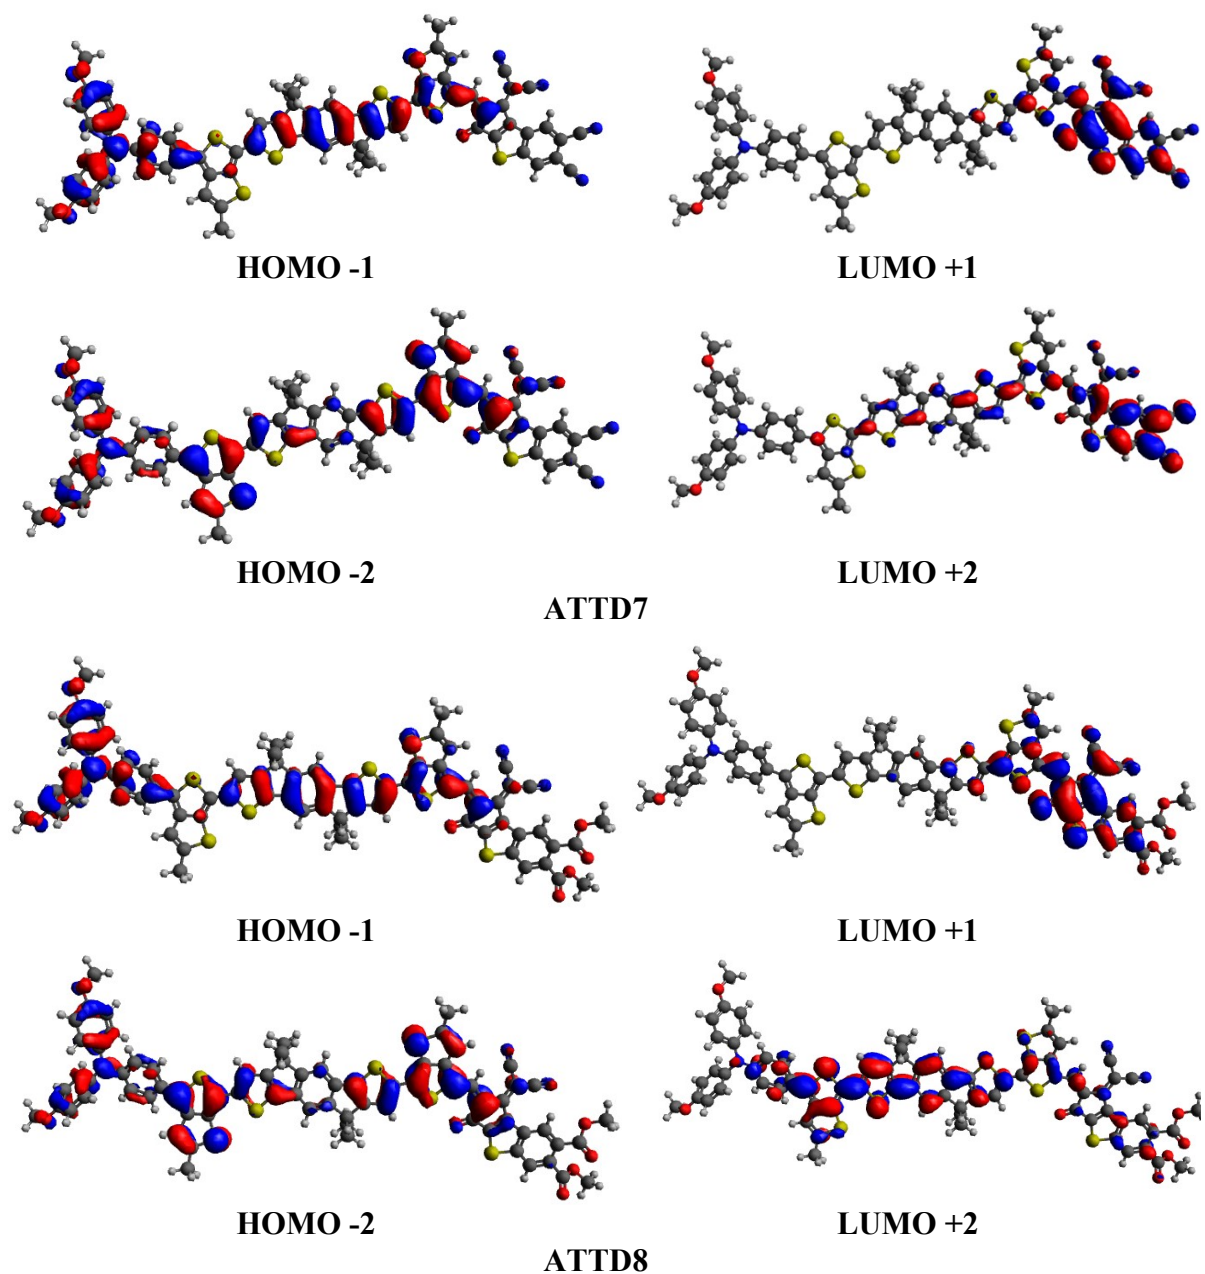

**Figure S2:** The pictograph of HOMO-1, LUMO+1, HOMO-2 and LUMO+2 of tailored compounds (ATTR1 and ATTD2-ATTD8).

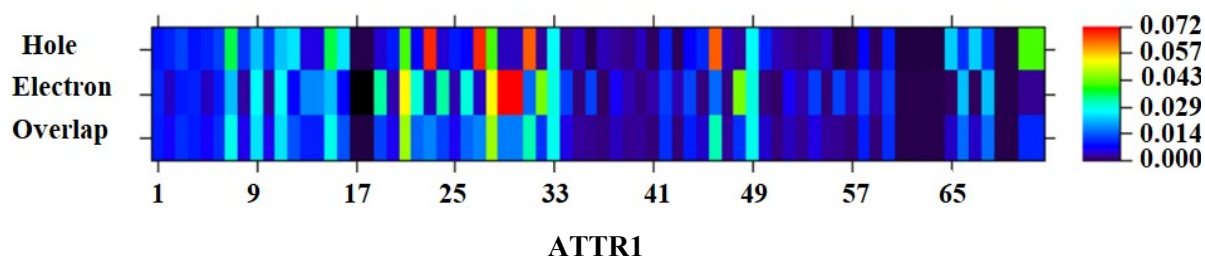

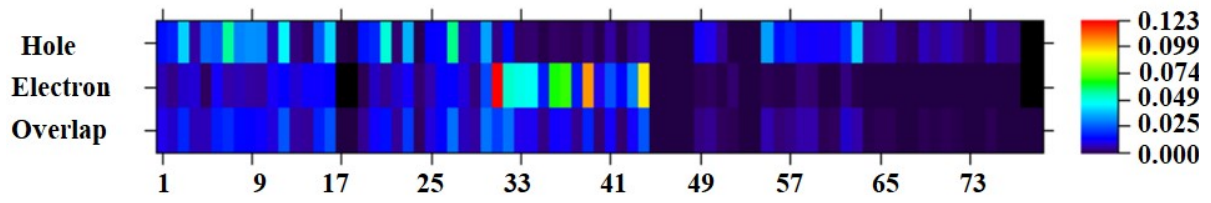

ATTD2

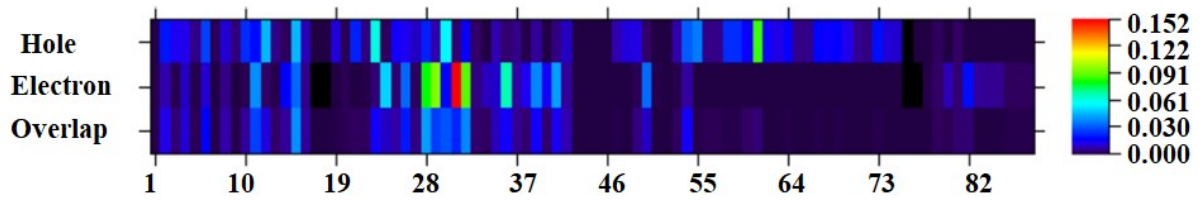

ATTD3

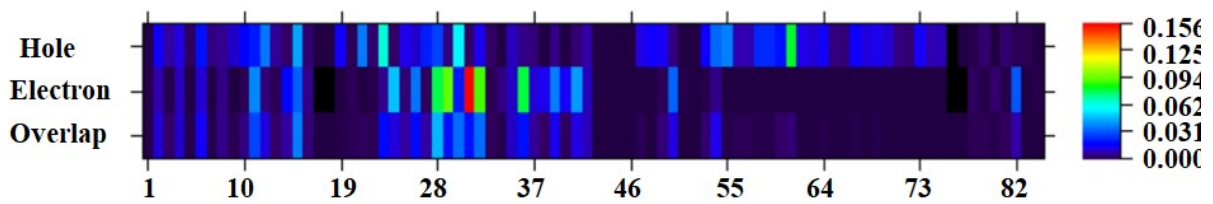

ATTD4

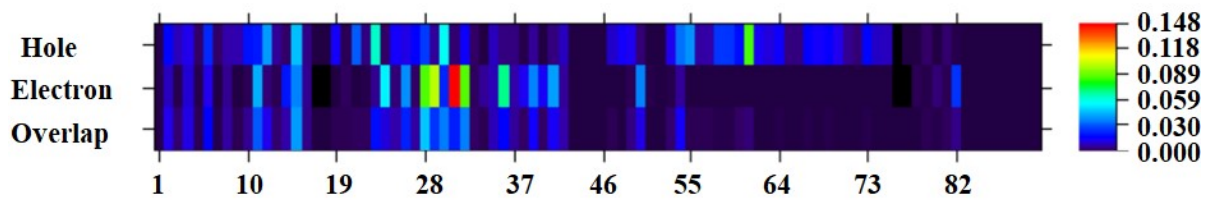

ATTD5

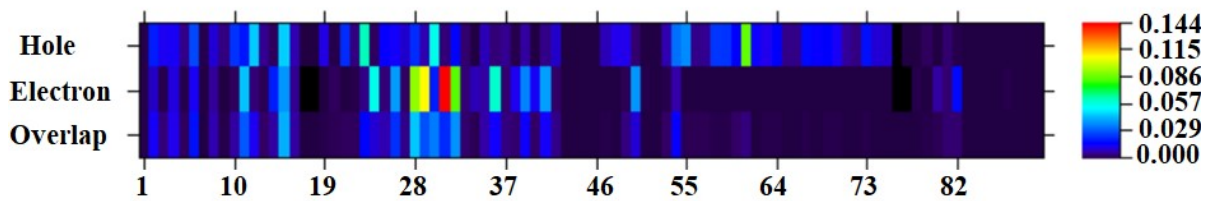

ATTD6

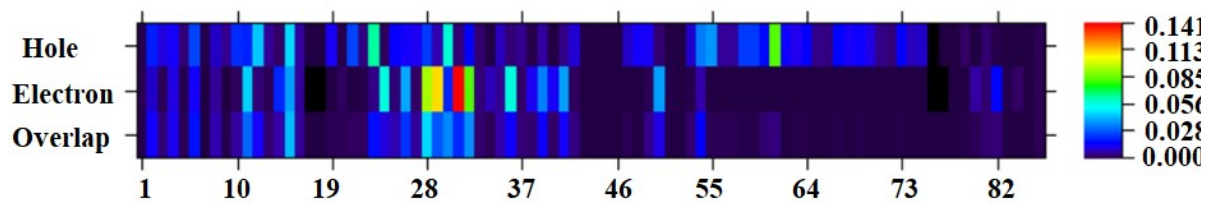

ATTD7

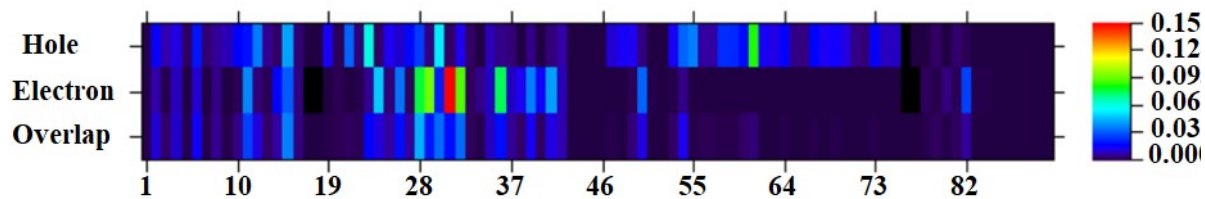

ATTD8

Figure S3. Pictorial representation of hole-electron transport investigation.

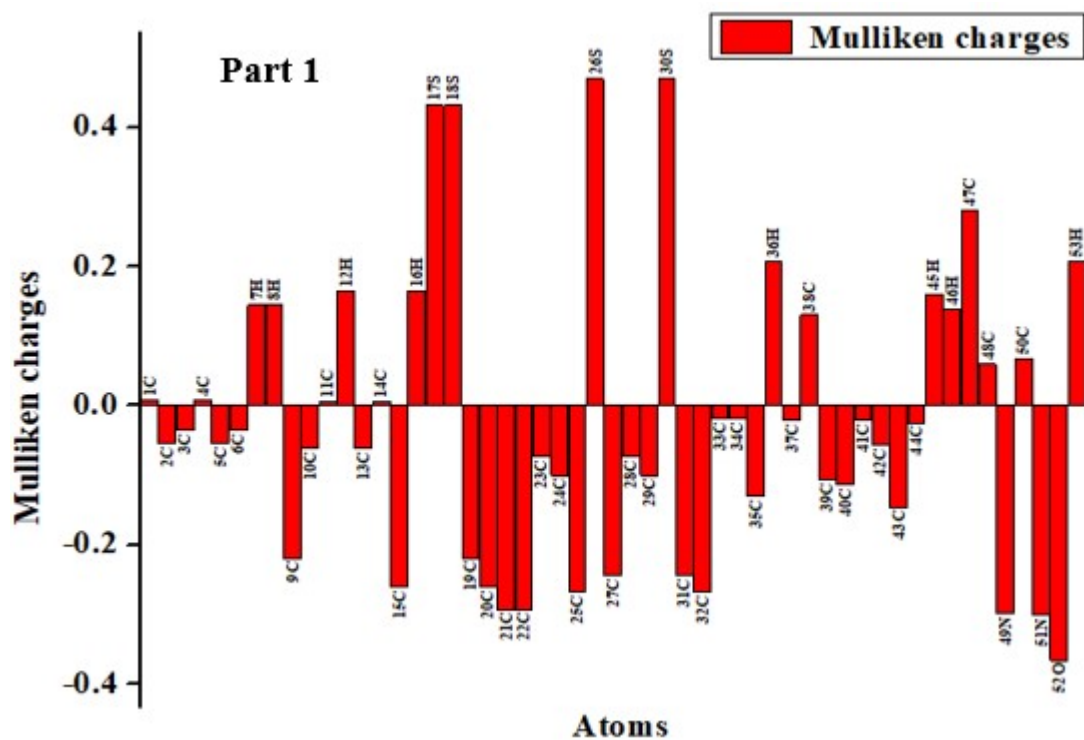



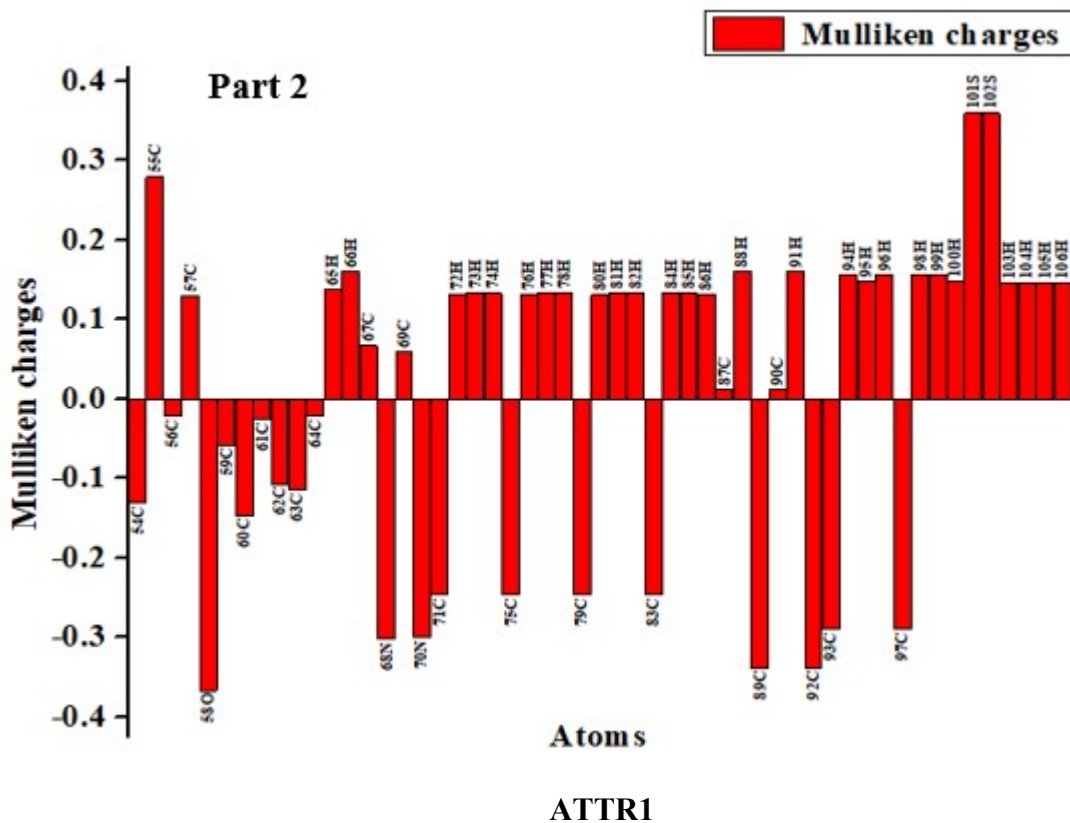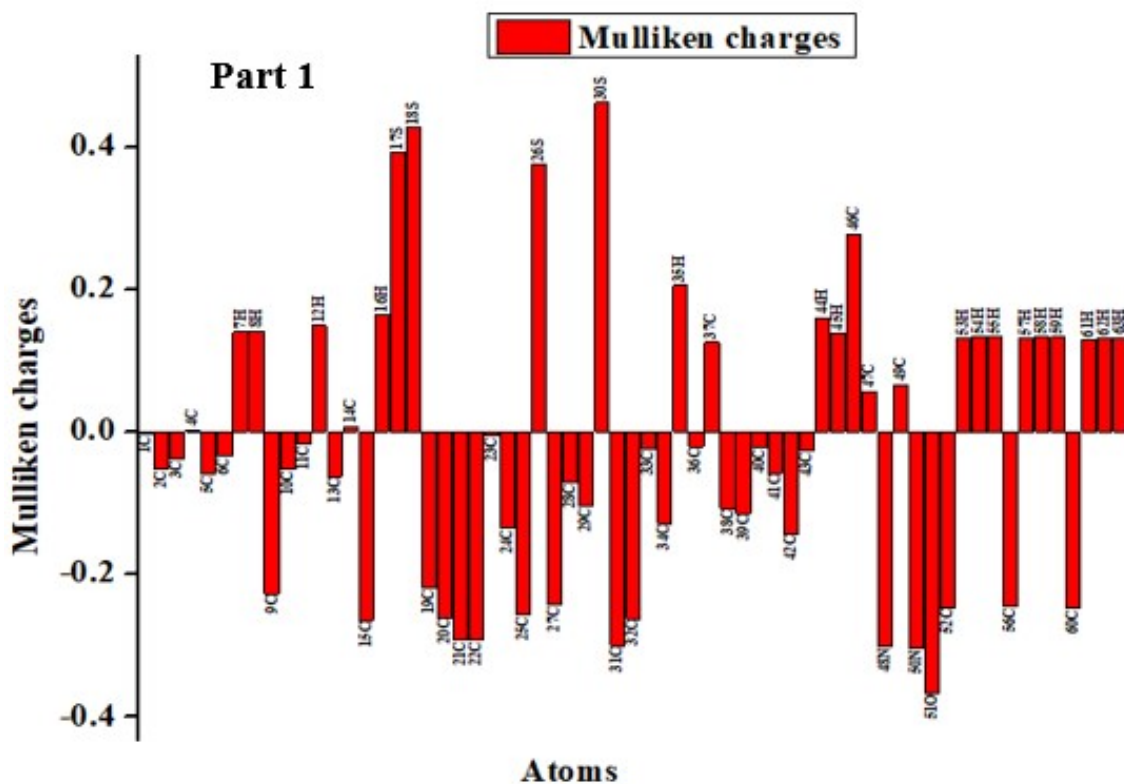

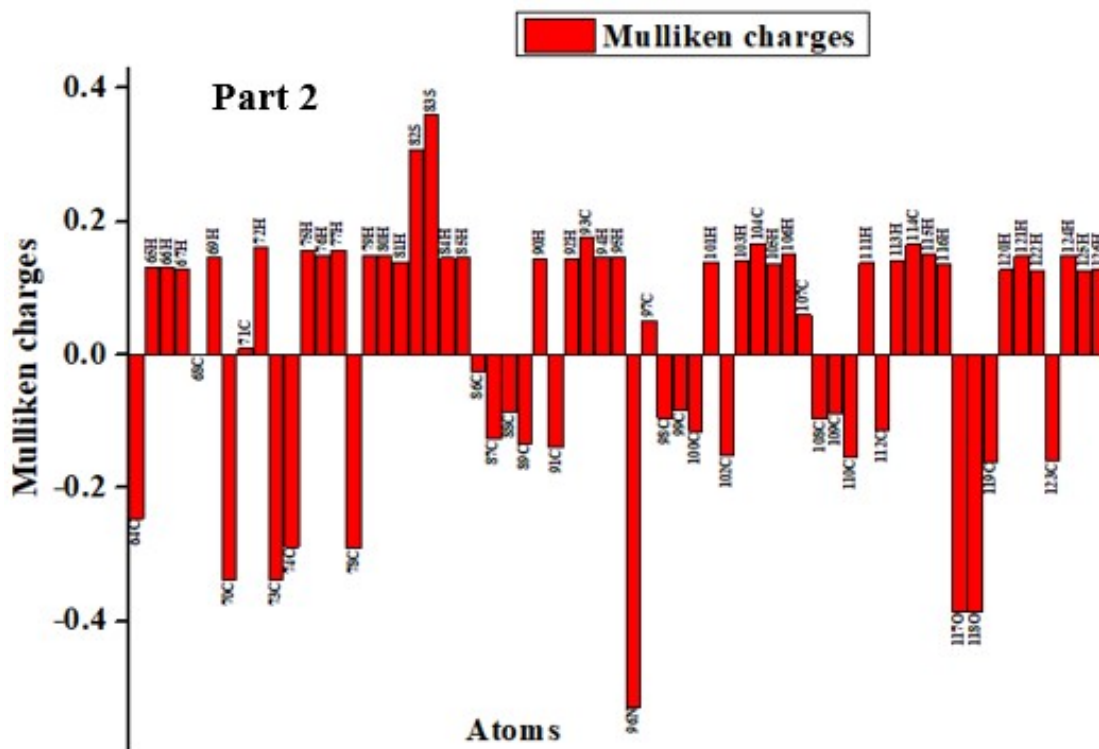

ATTD2

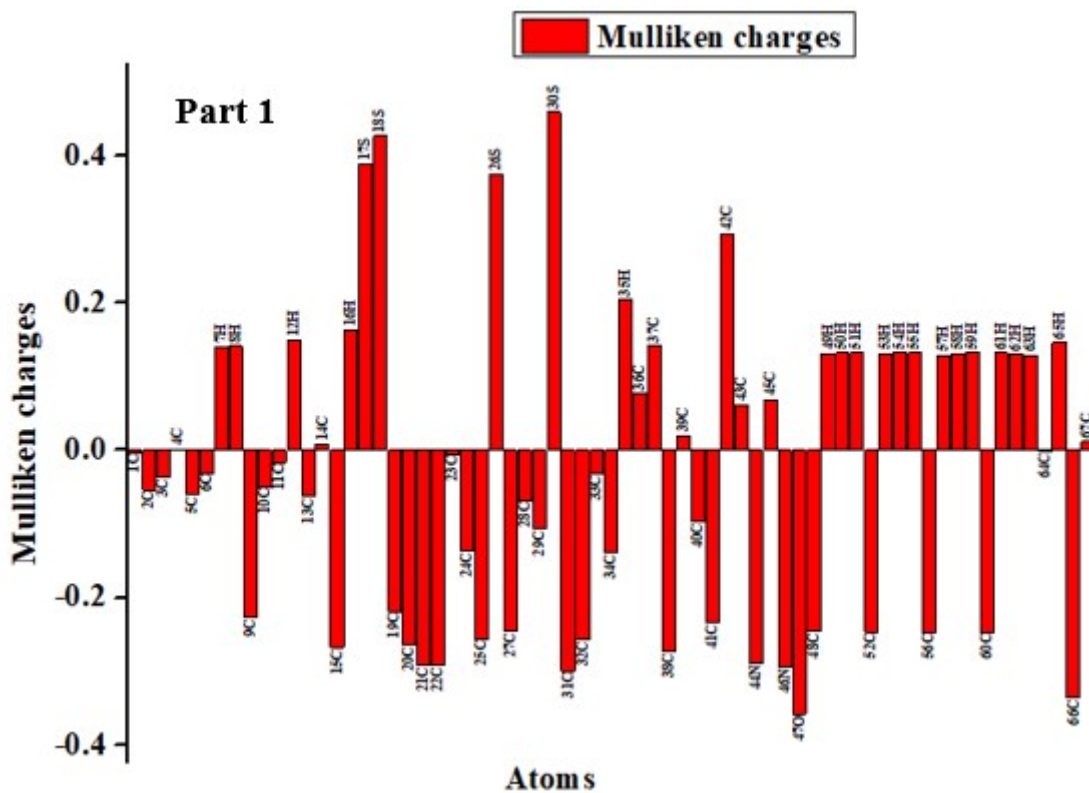

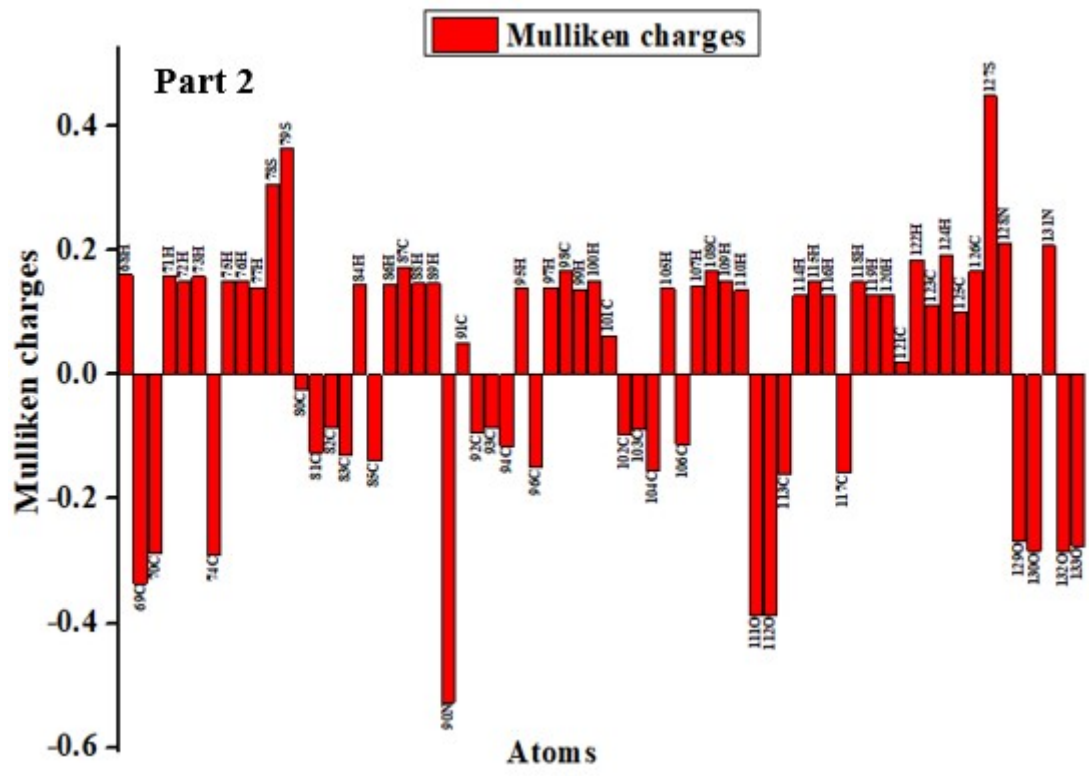

ATTD3

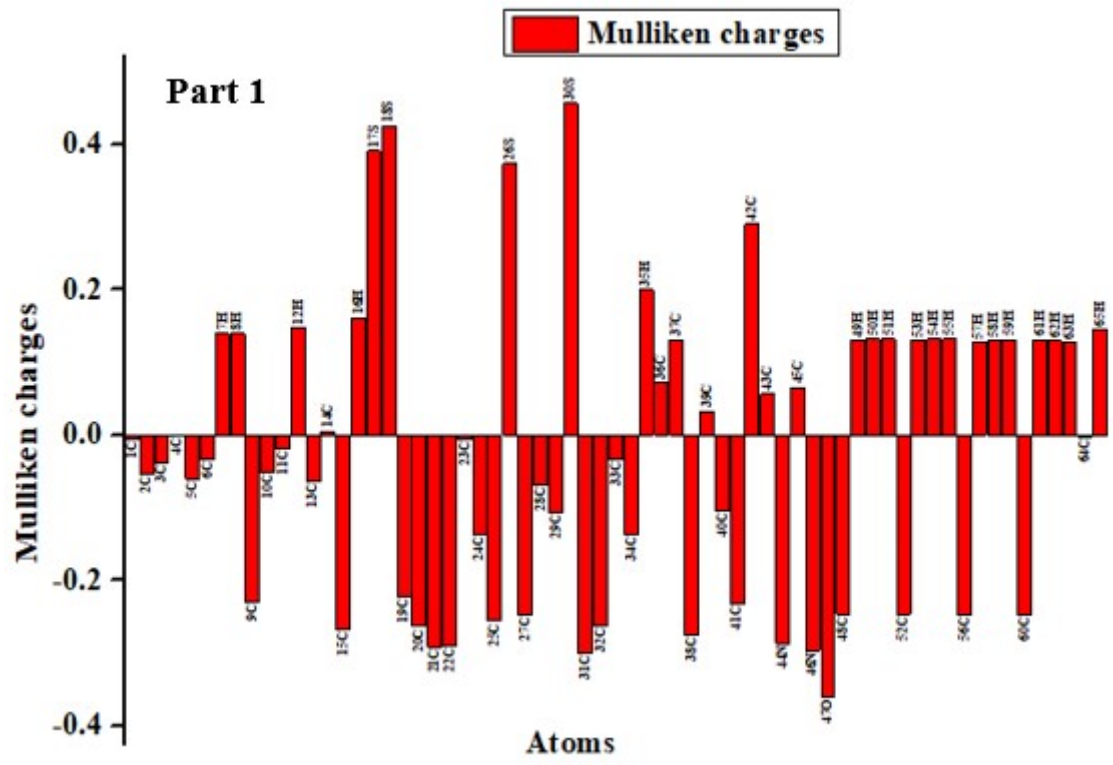

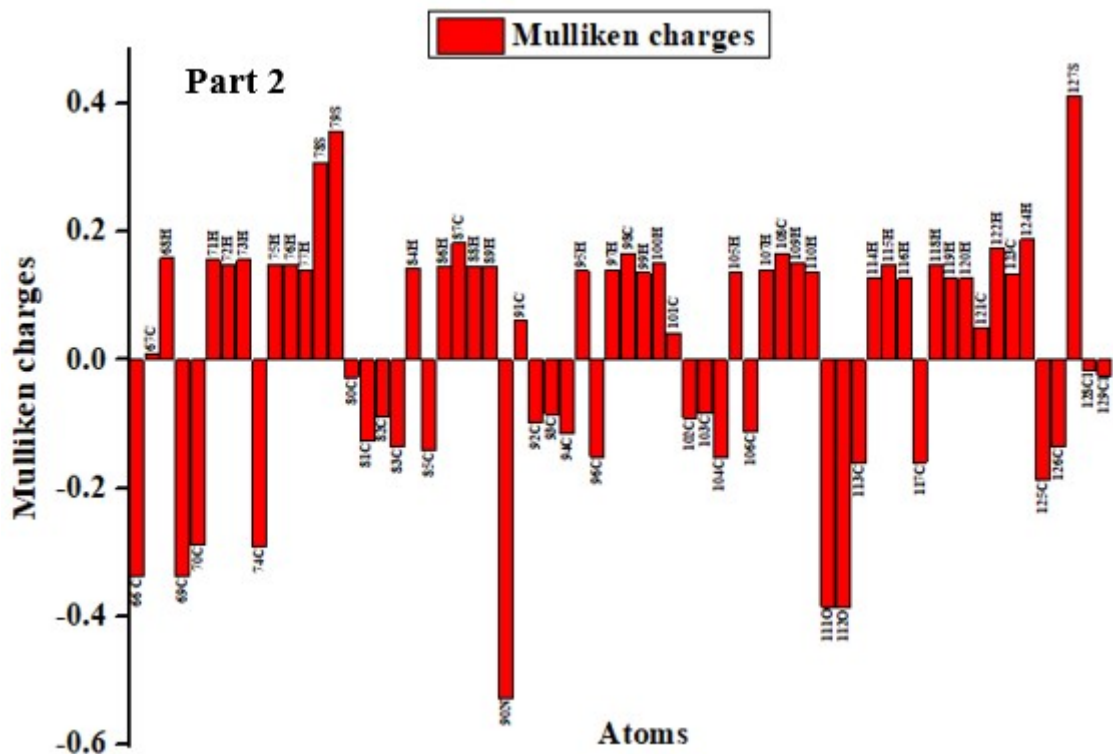

ATTD4

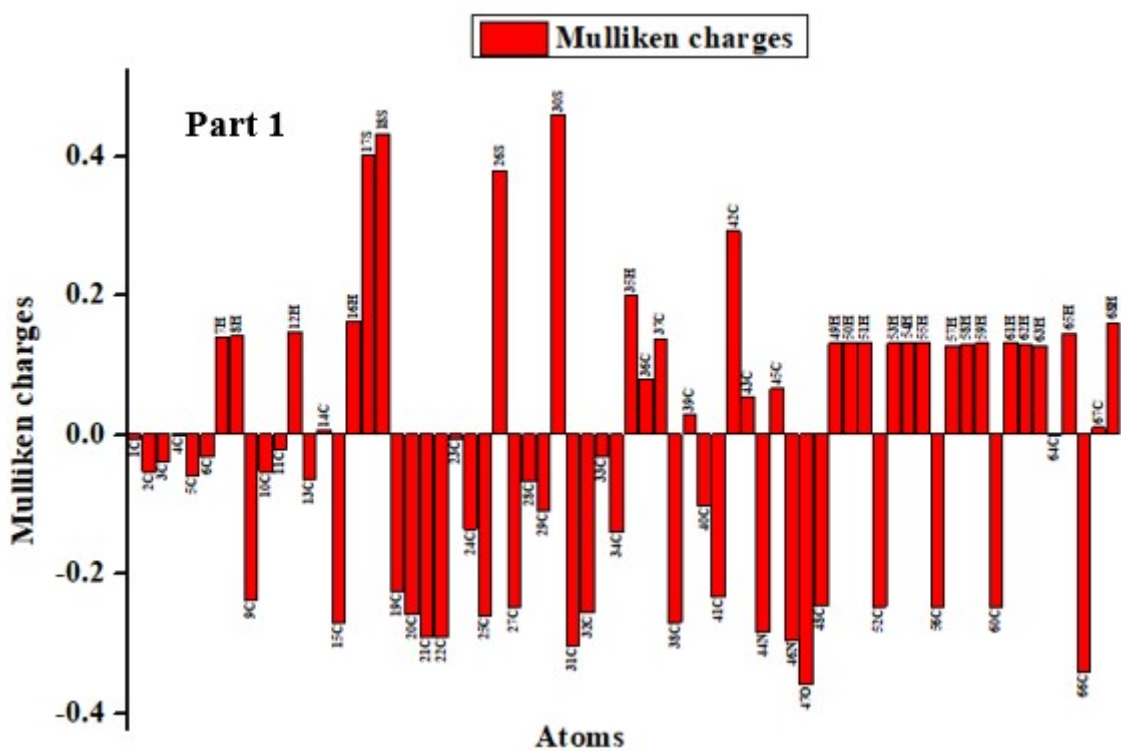

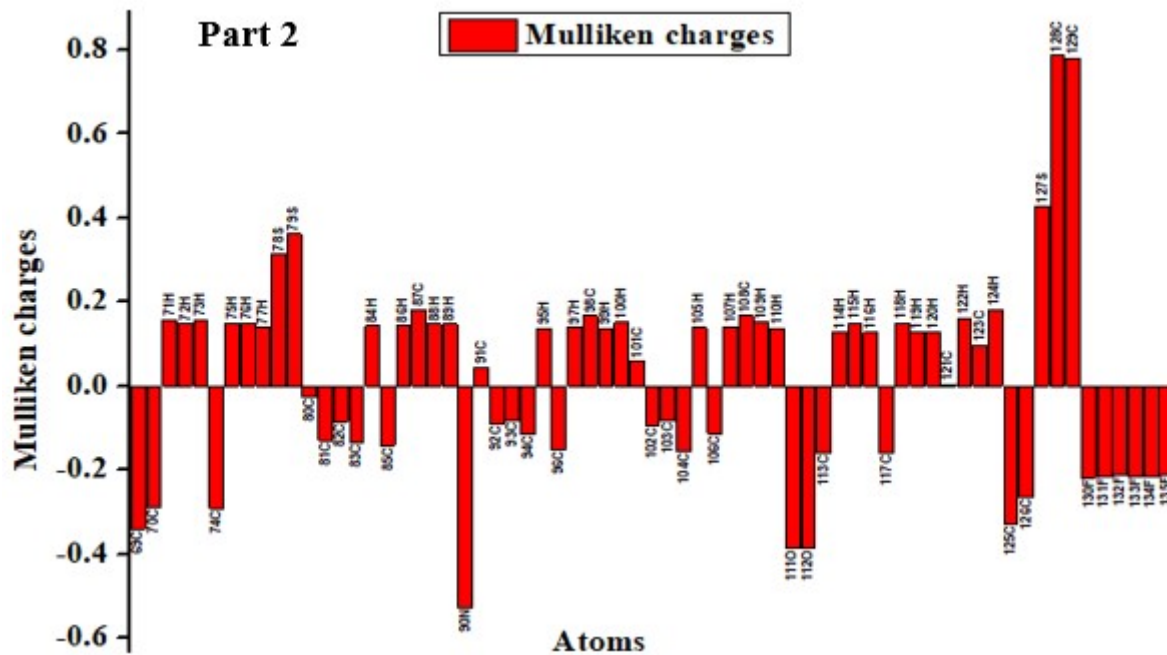

ATTD5

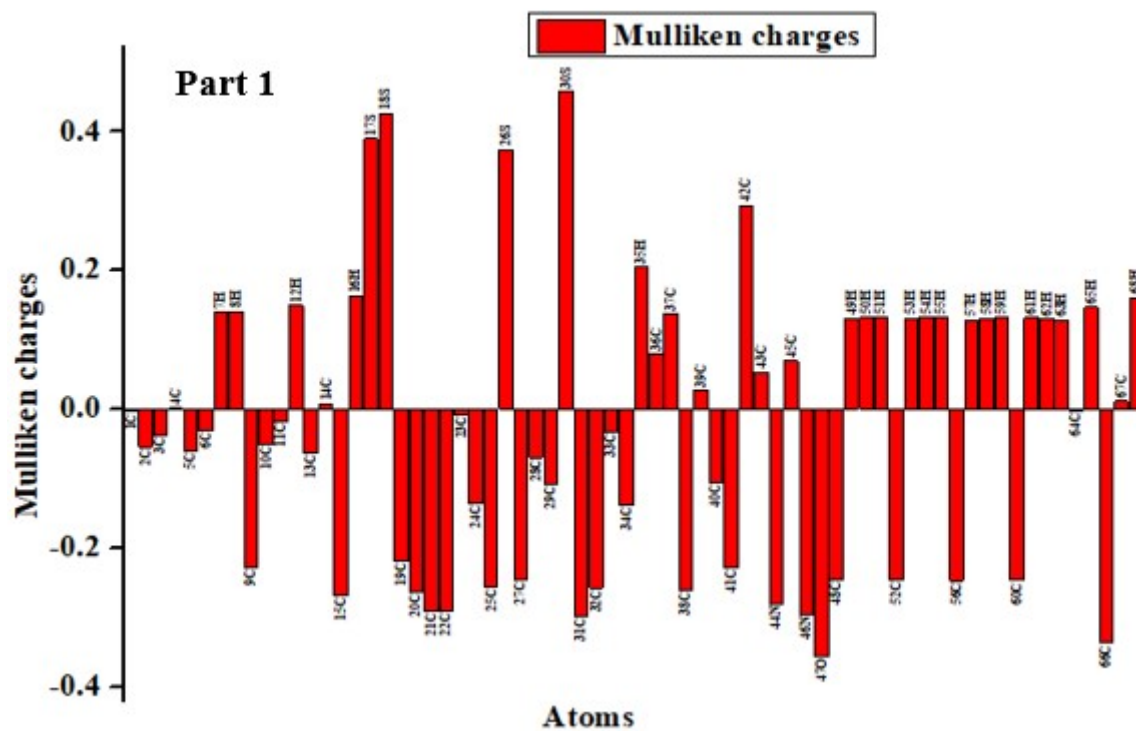

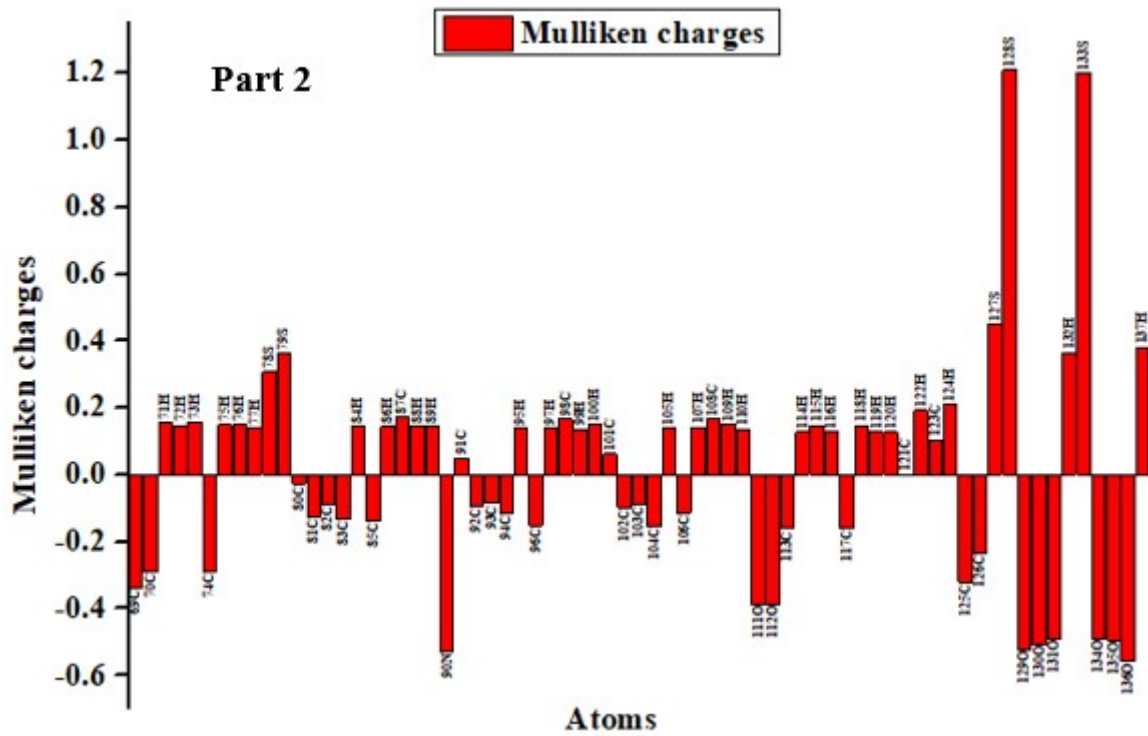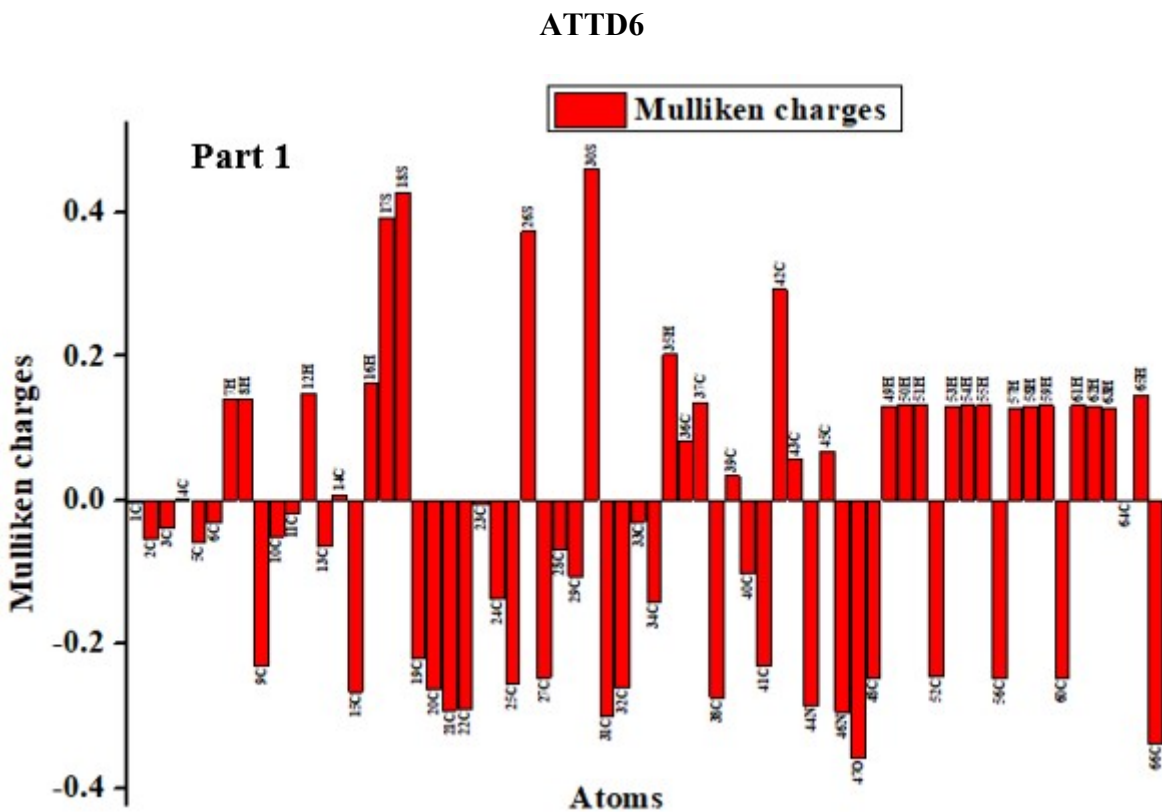

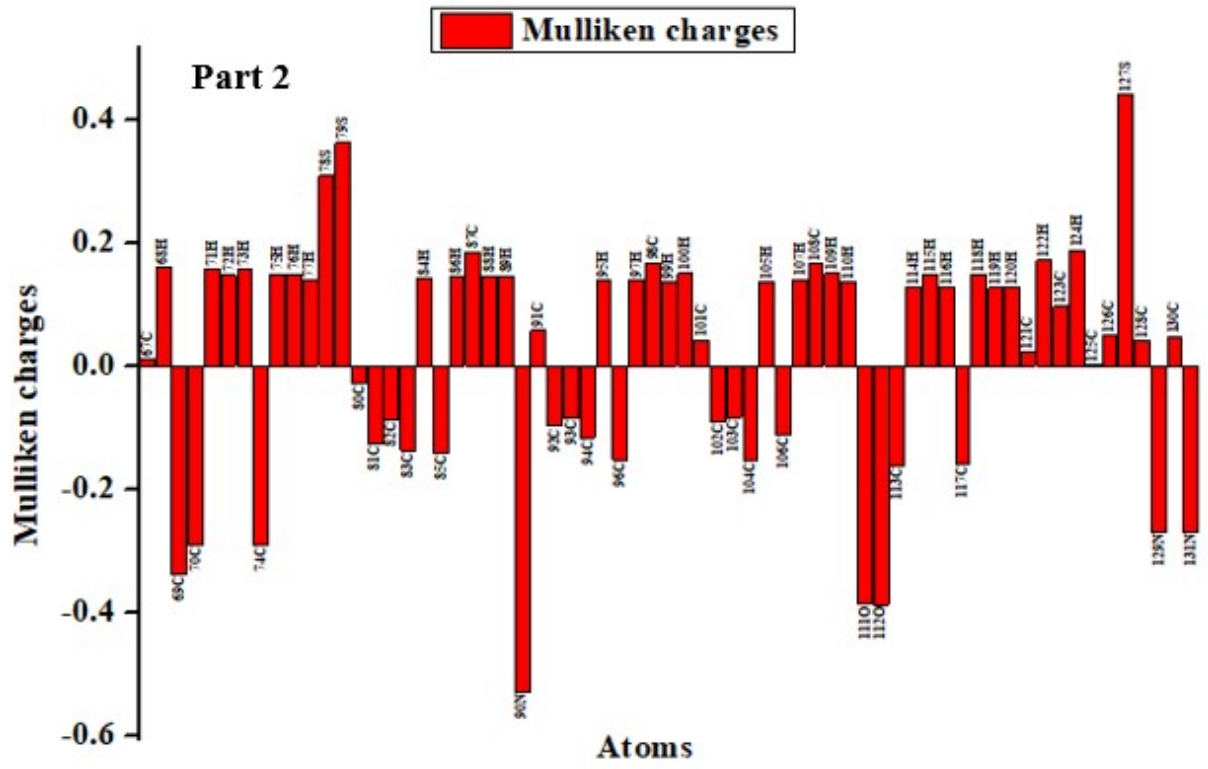

ATTD7

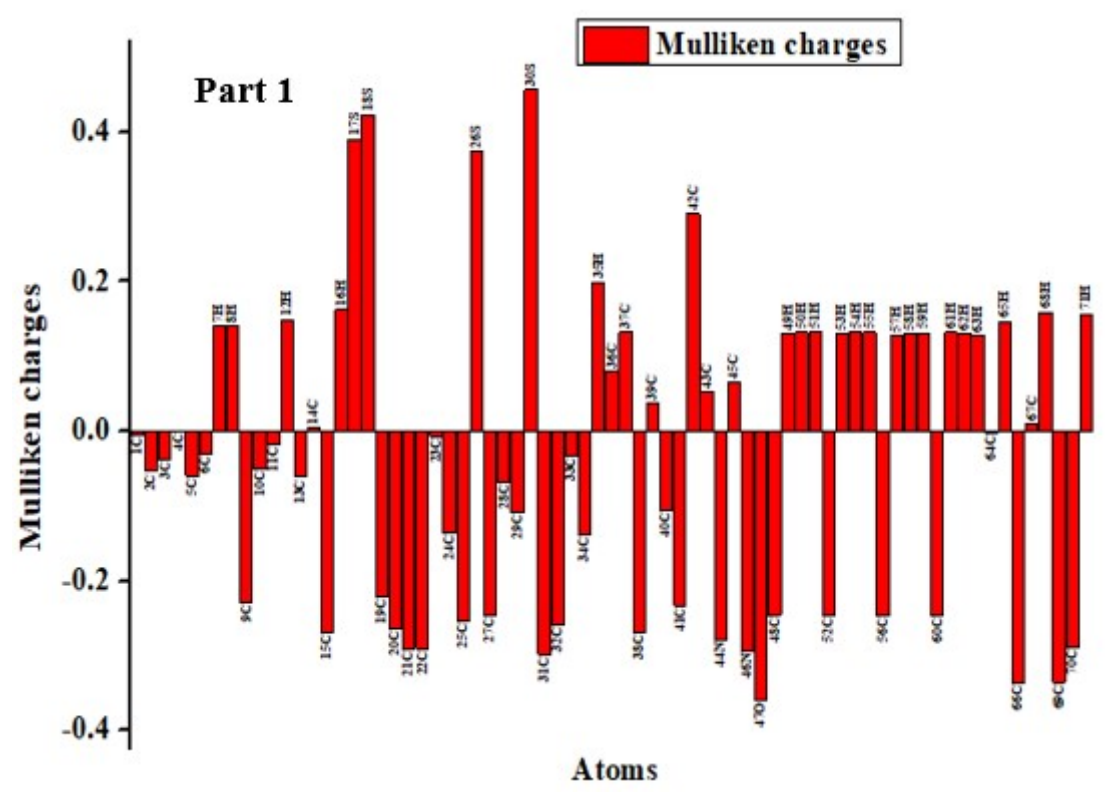

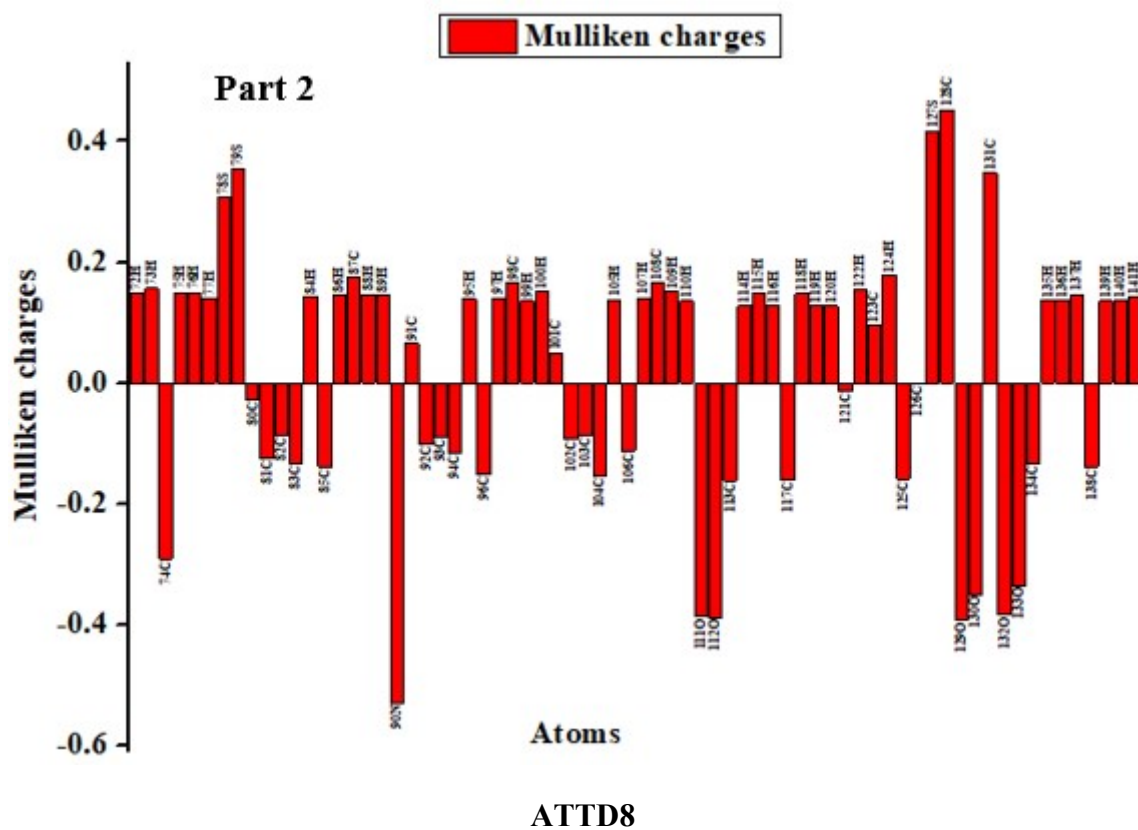

**Figure S4:** The graphs of Natural population analysis of ATTR and ATTD2-ATTD8.

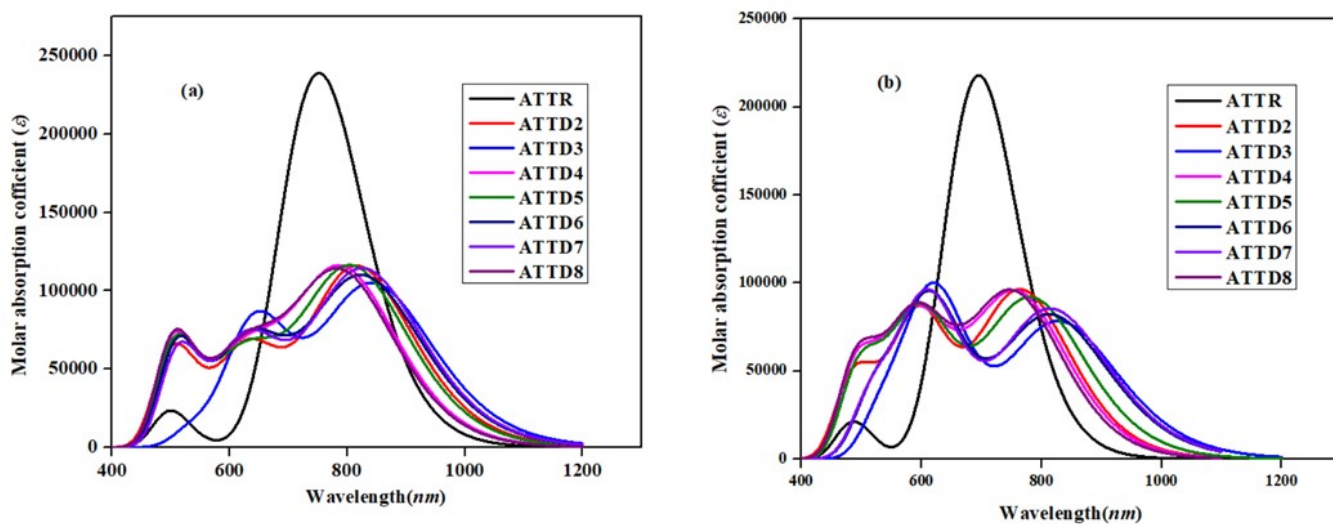

**Figure S5:** Absorption spectra of ATTR and ATTD2-ATTD8 (a) in chloroform and (b) in gaseous phase.  
CH<sub>3</sub>
